# Supplementary material
Source: PubMed Central journal article supplement (PMC4898783)

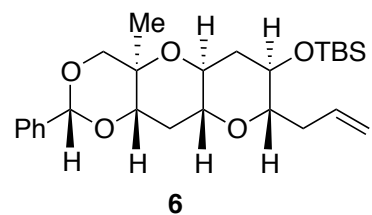

$^1\text{H}$  NMR, 500 MHz,  $\text{C}_6\text{D}_6$

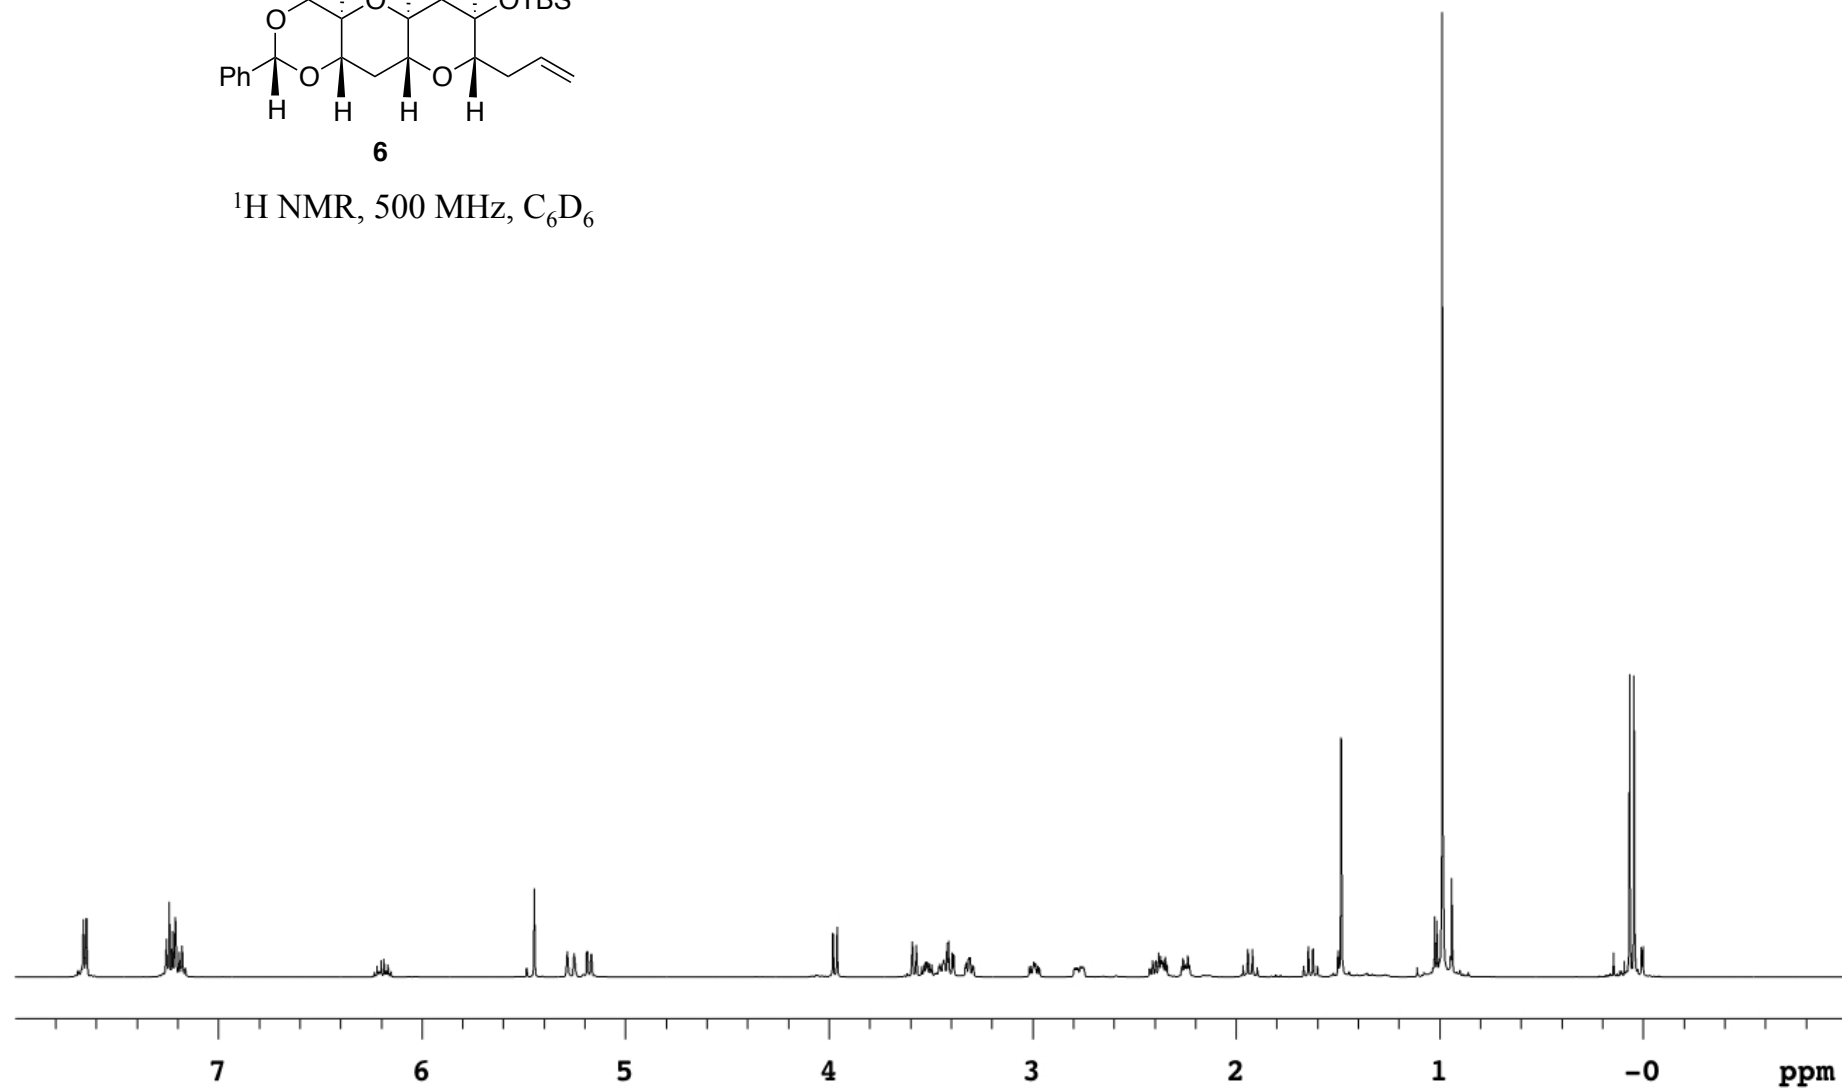

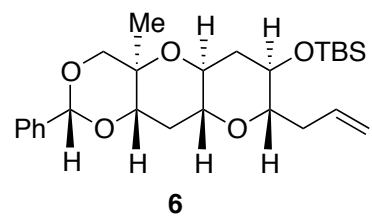

$^{13}\text{C}$  NMR, 125 MHz,  $\text{C}_6\text{D}_6$

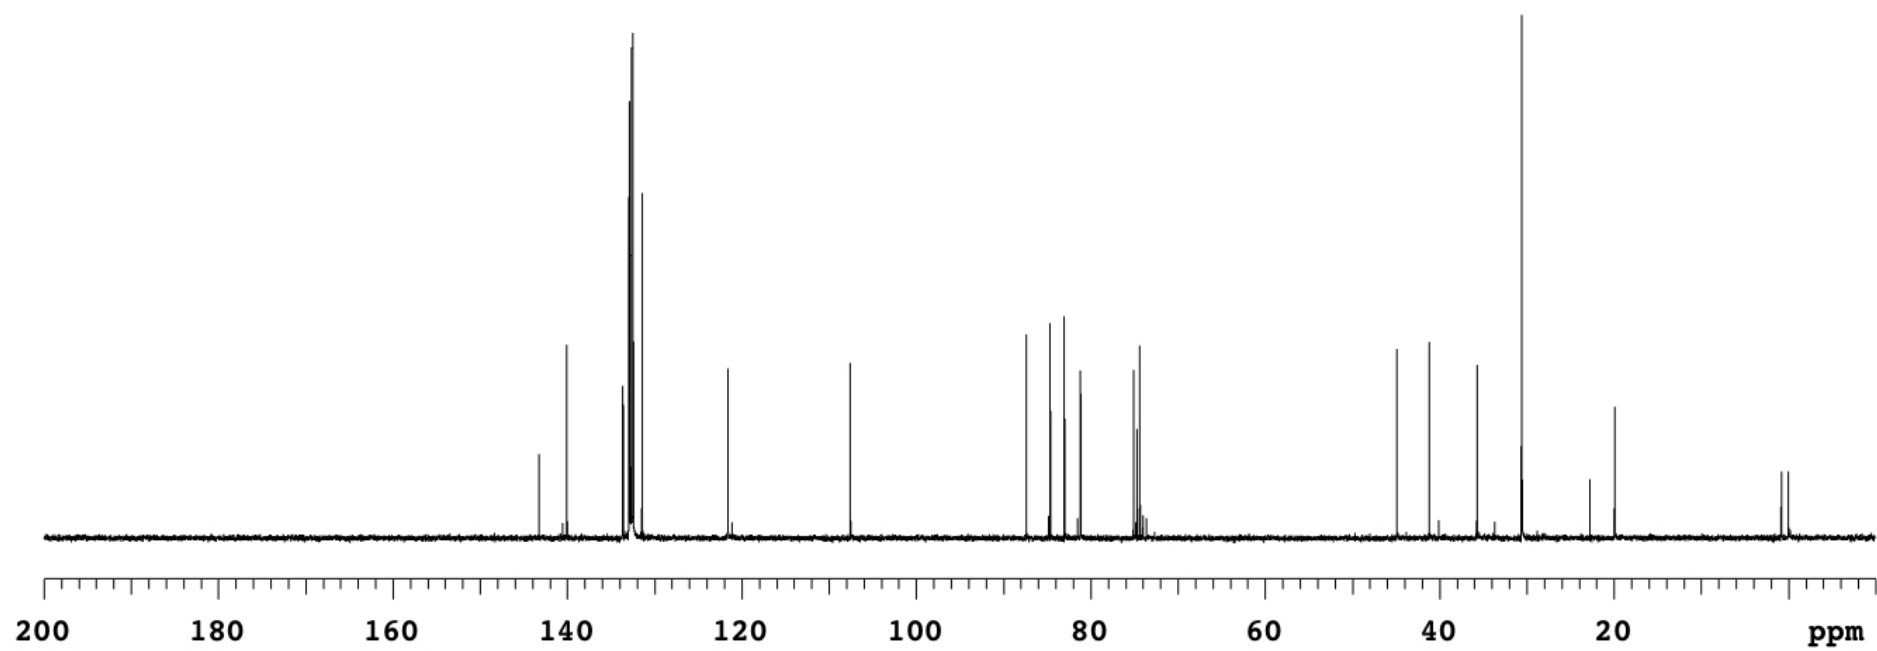

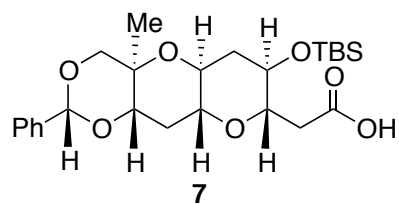

$^1\text{H}$  NMR, 500 MHz,  $\text{CD}_2\text{Cl}_2$

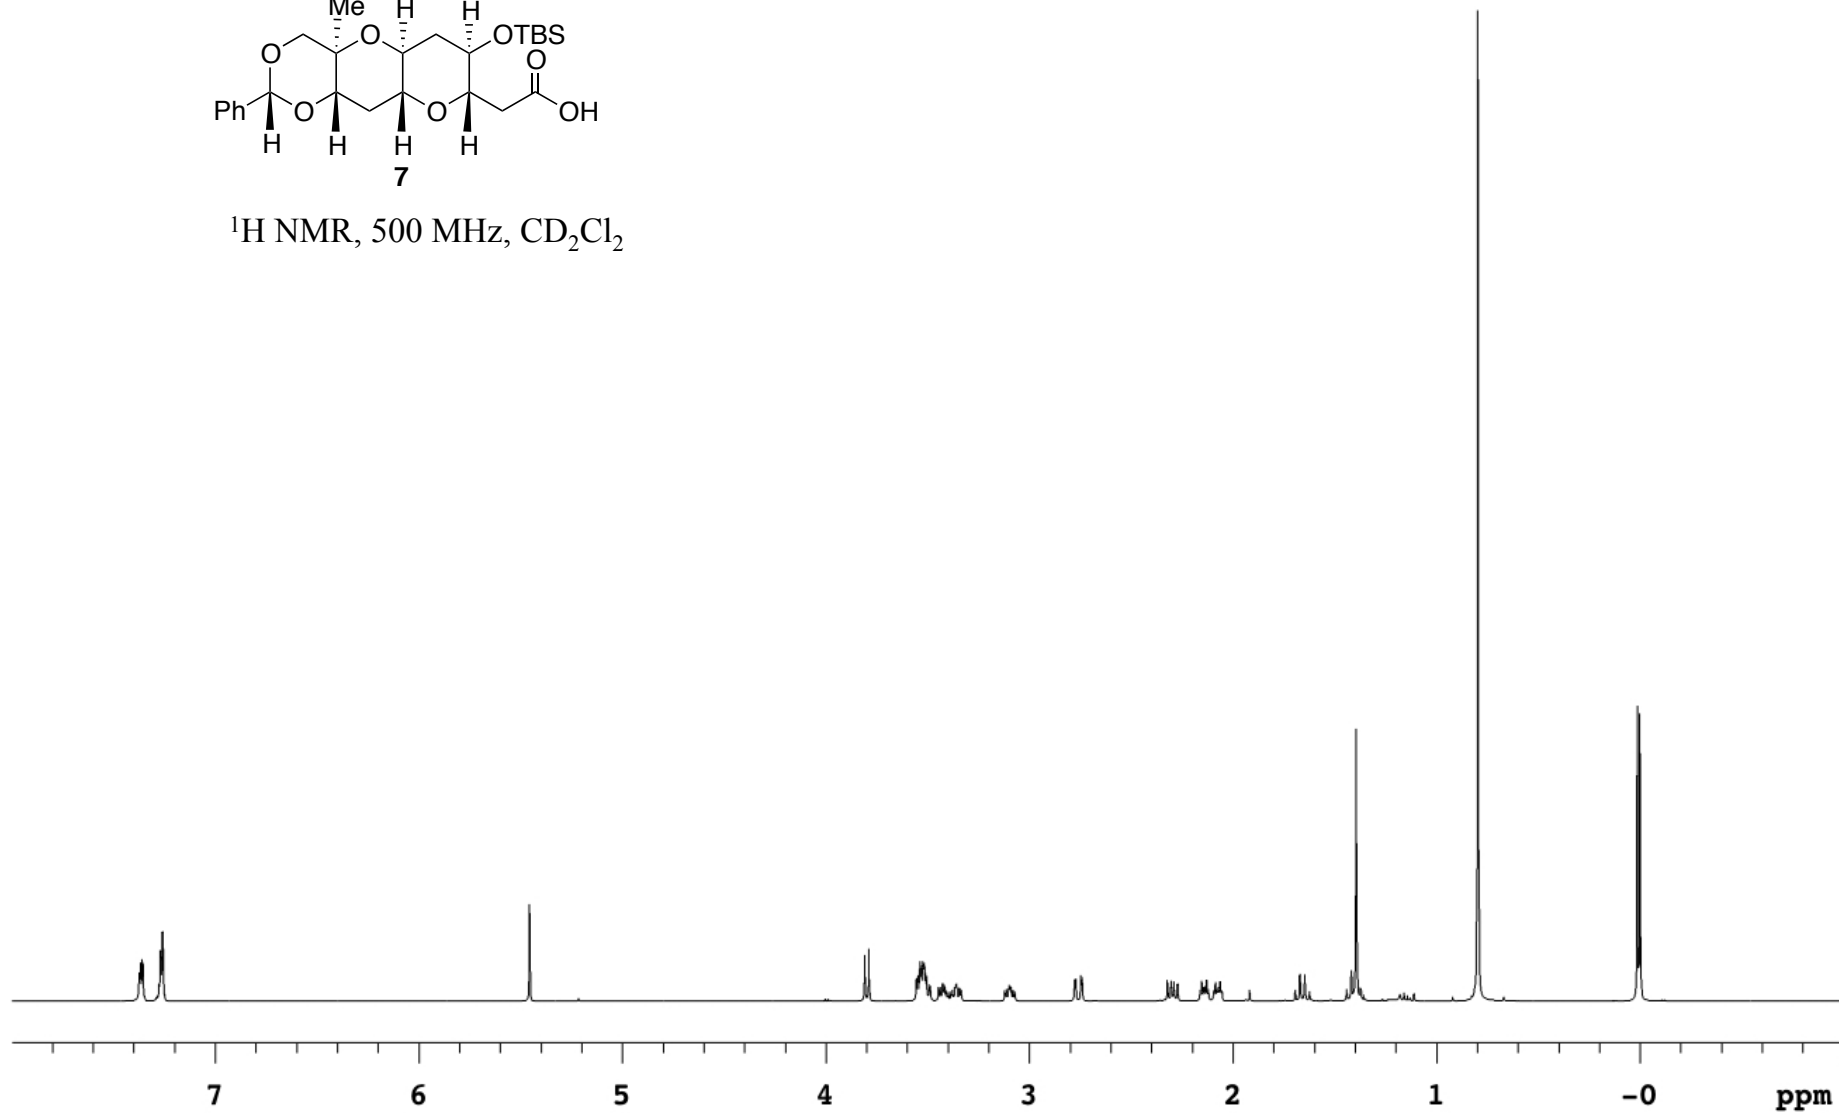

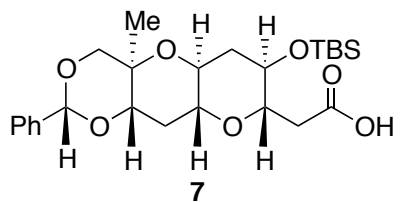

$^{13}\text{C}$  NMR, 125 MHz,  $\text{CD}_2\text{Cl}_2$

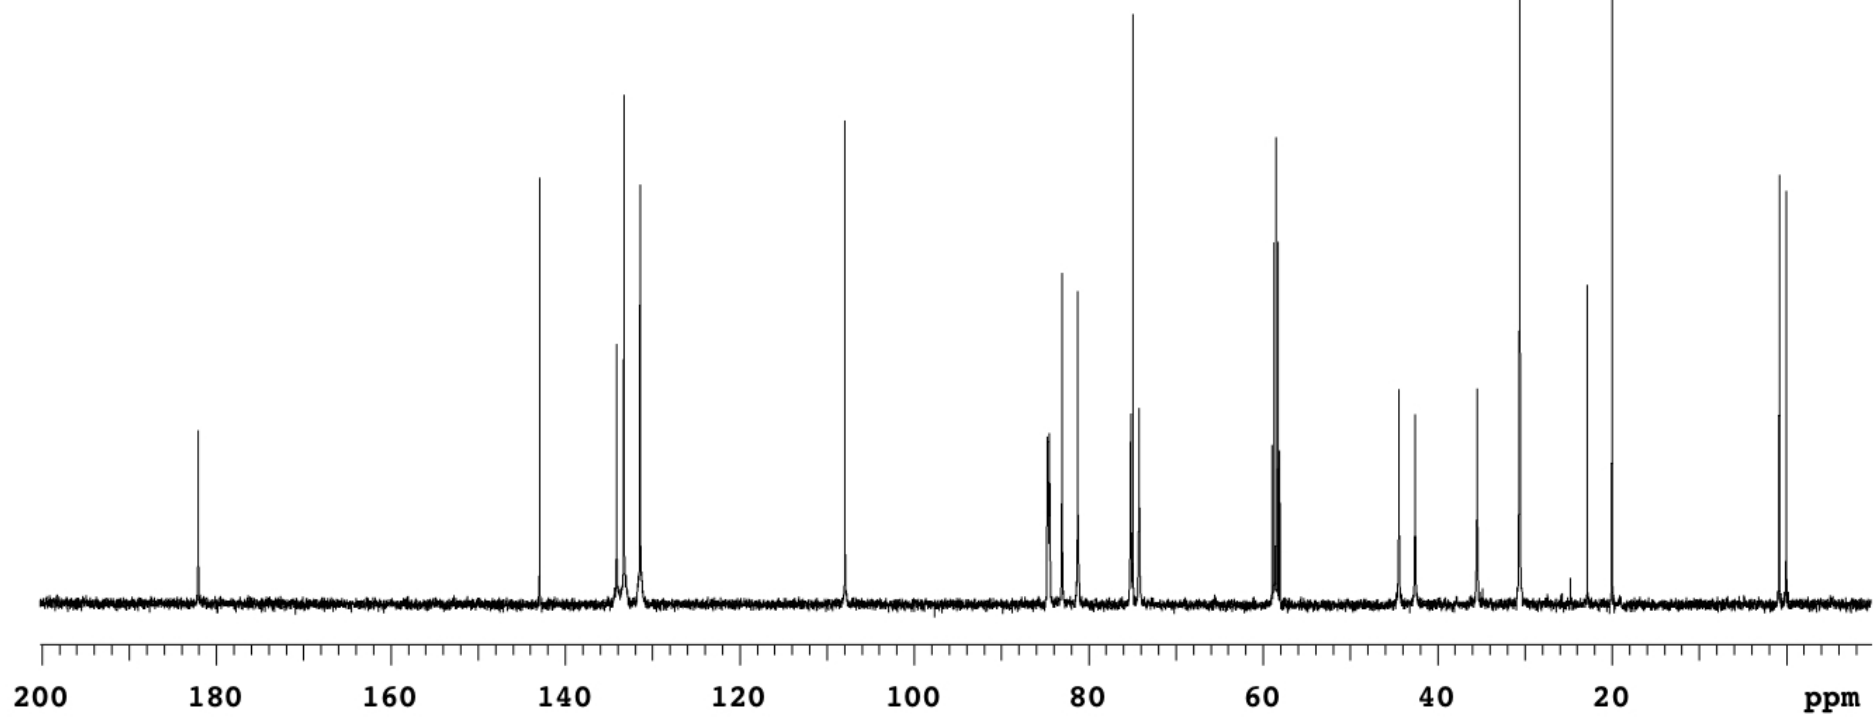

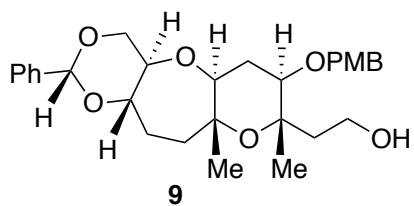

$^1\text{H}$  NMR, 500 MHz,  $\text{CD}_2\text{Cl}_2$

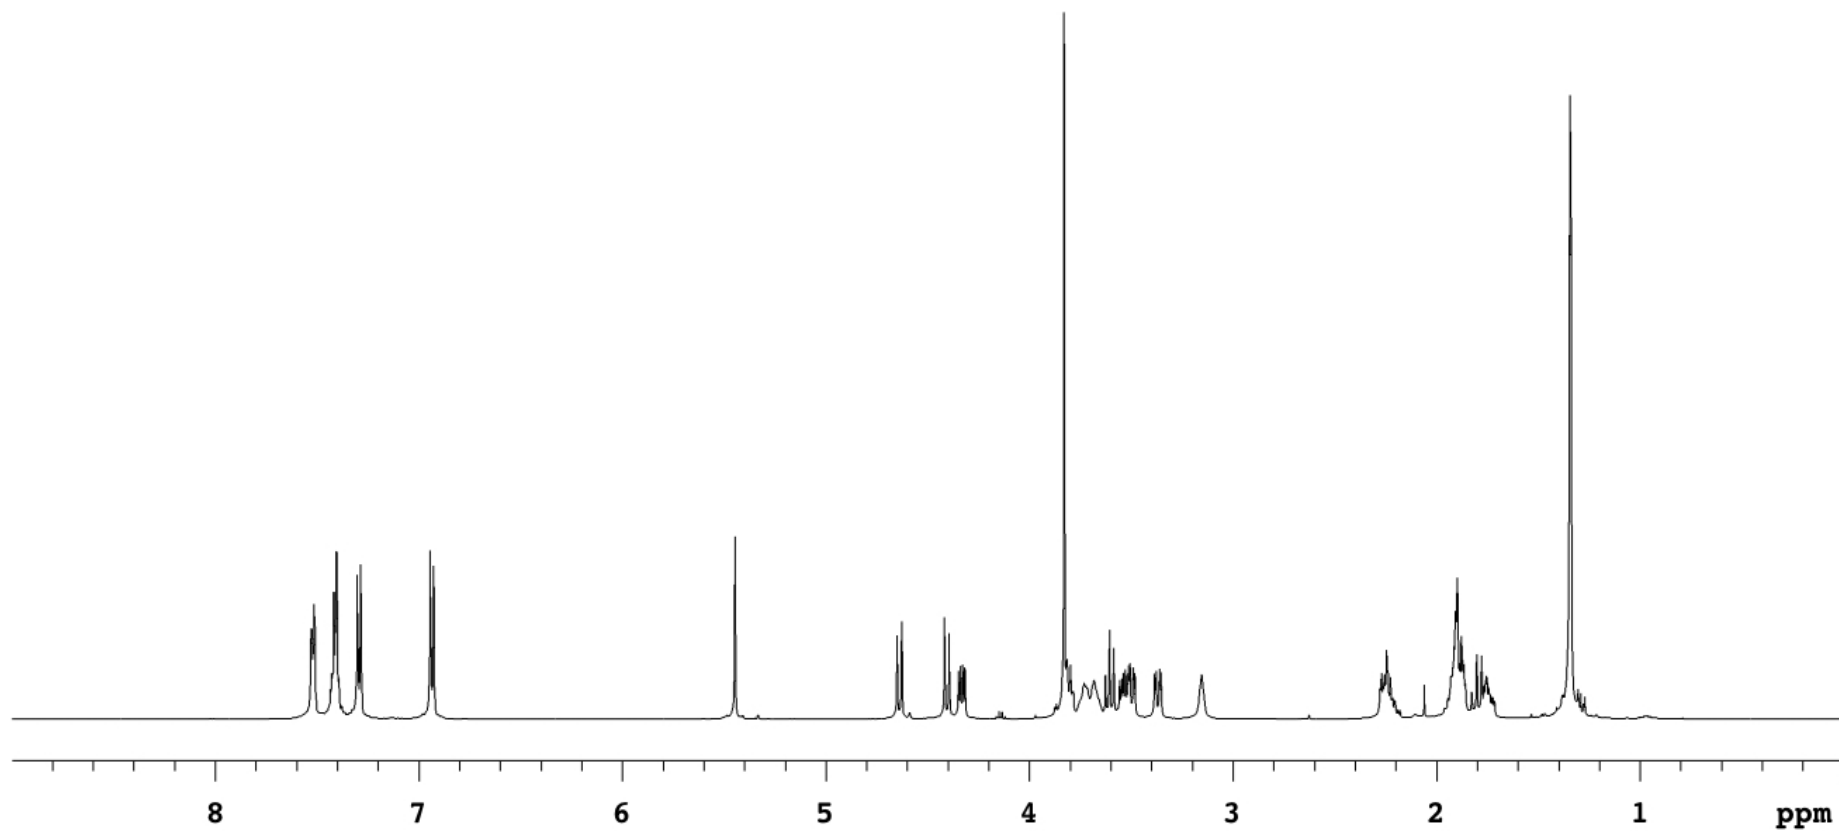

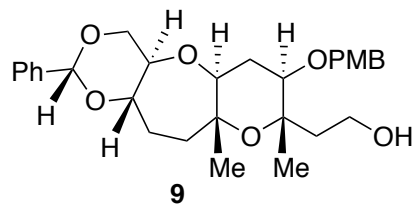

$^{13}\text{C}$  NMR, 125 MHz,  $\text{CD}_2\text{Cl}_2$

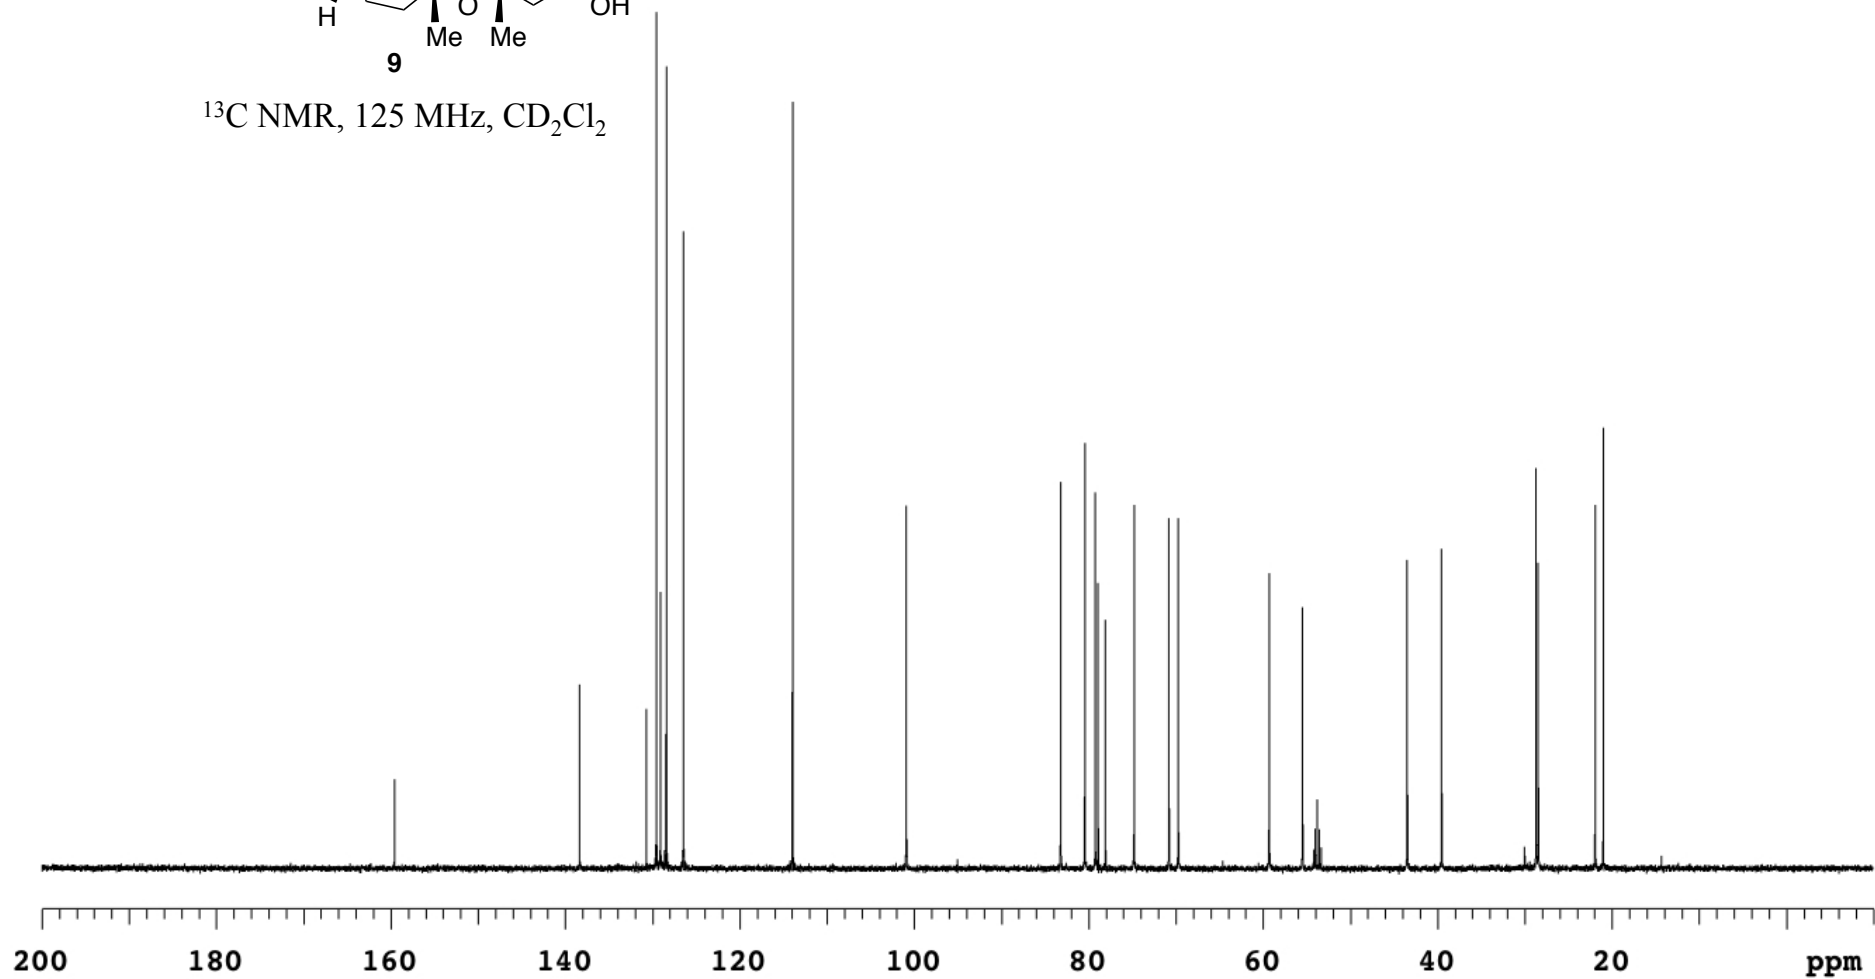

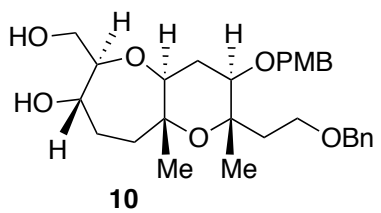

$^1\text{H}$  NMR, 500 MHz,  $\text{CD}_2\text{Cl}_2$

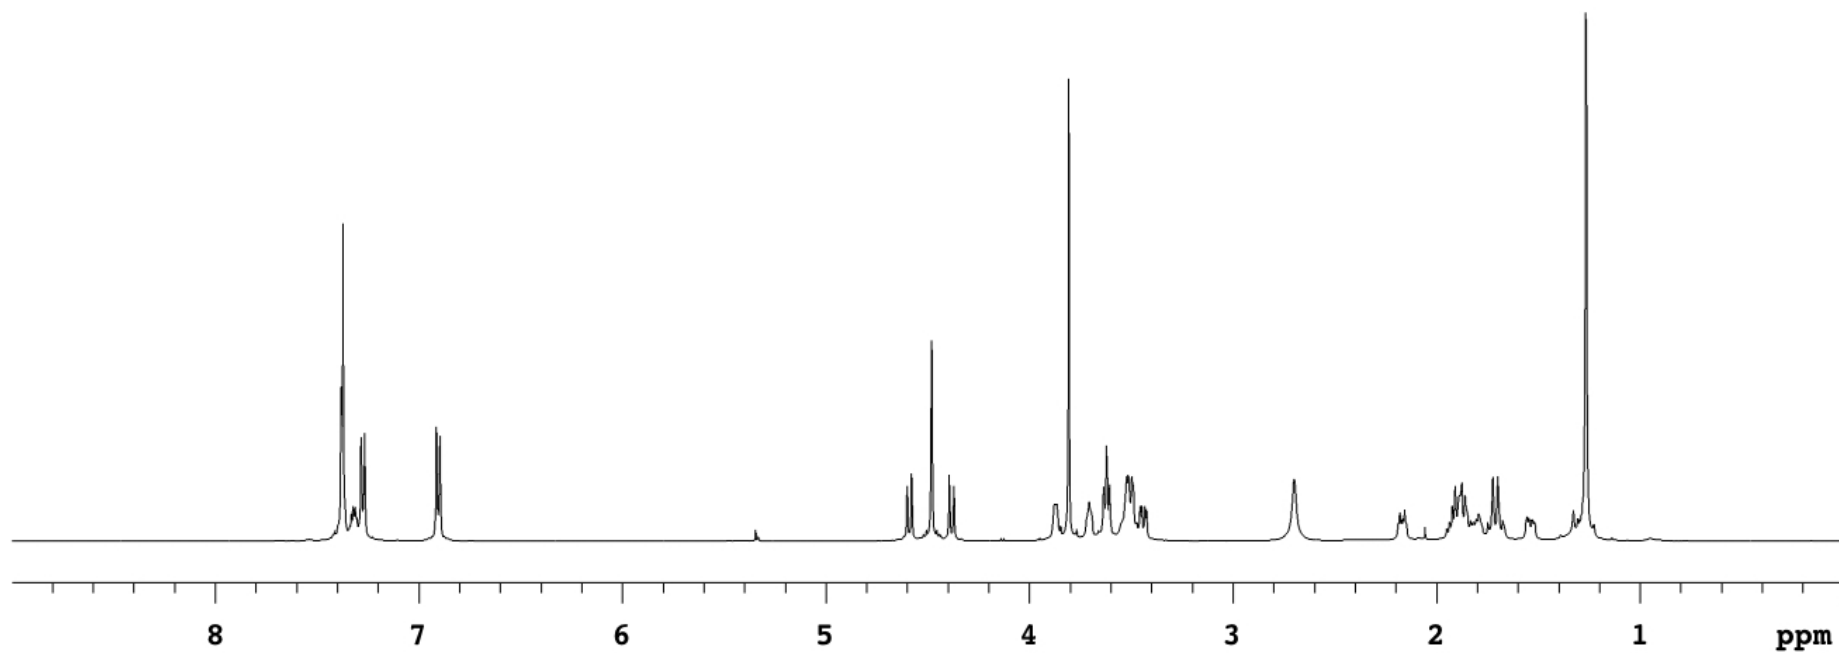

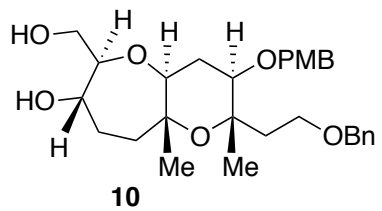

$^{13}\text{C}$  NMR, 125 MHz,  $\text{CD}_2\text{Cl}_2$

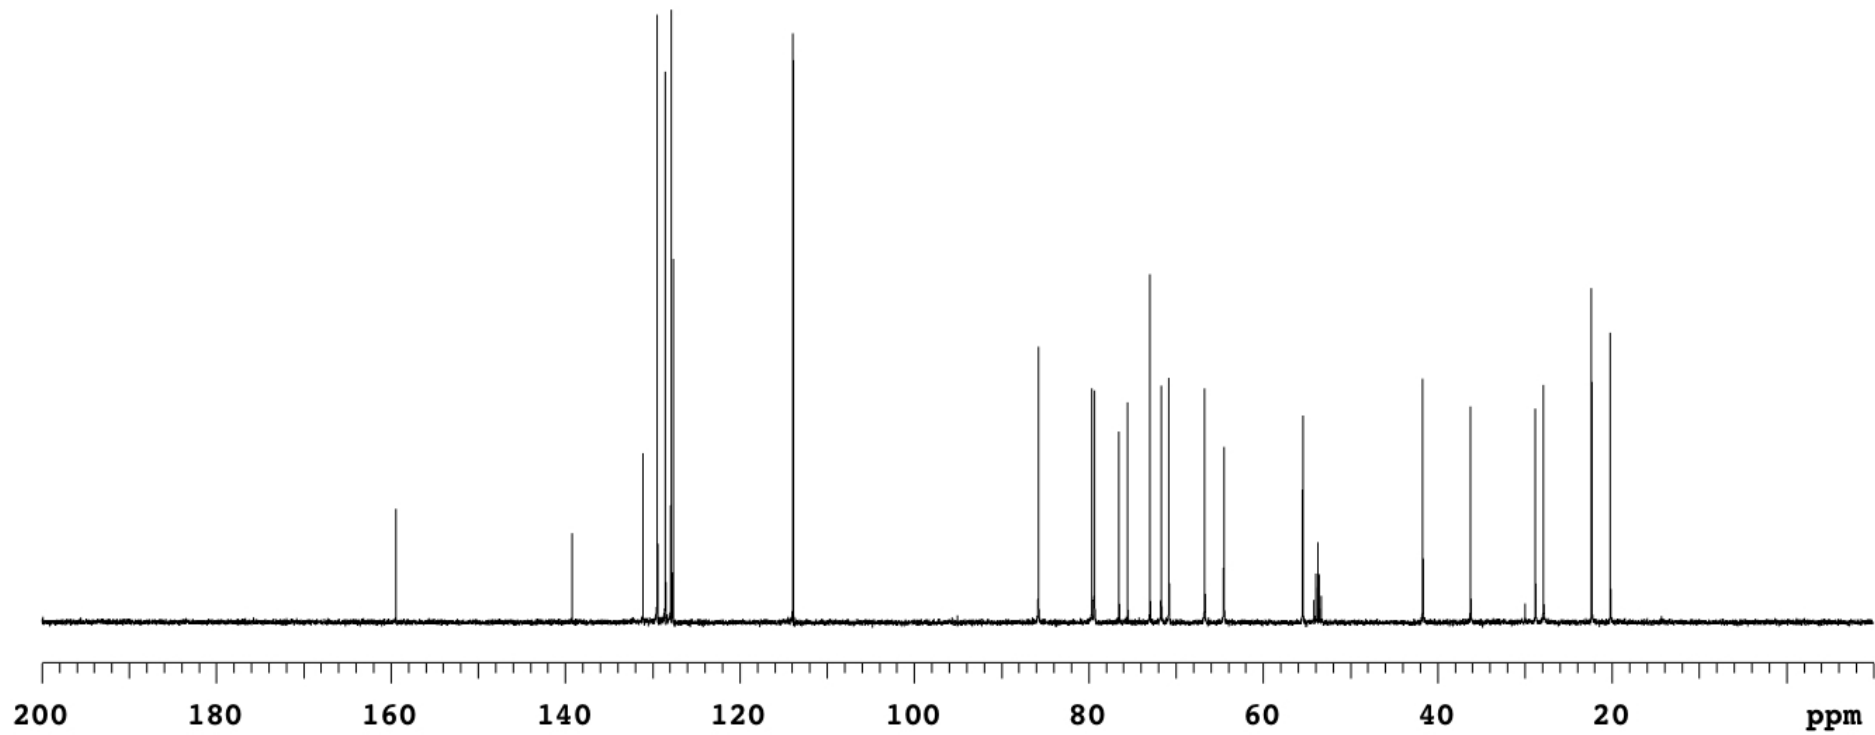



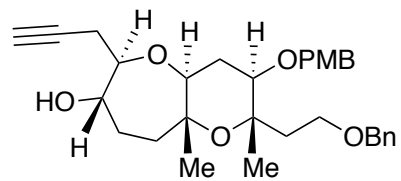

12

<sup>1</sup>H NMR, 500 MHz, CD<sub>2</sub>Cl<sub>2</sub>

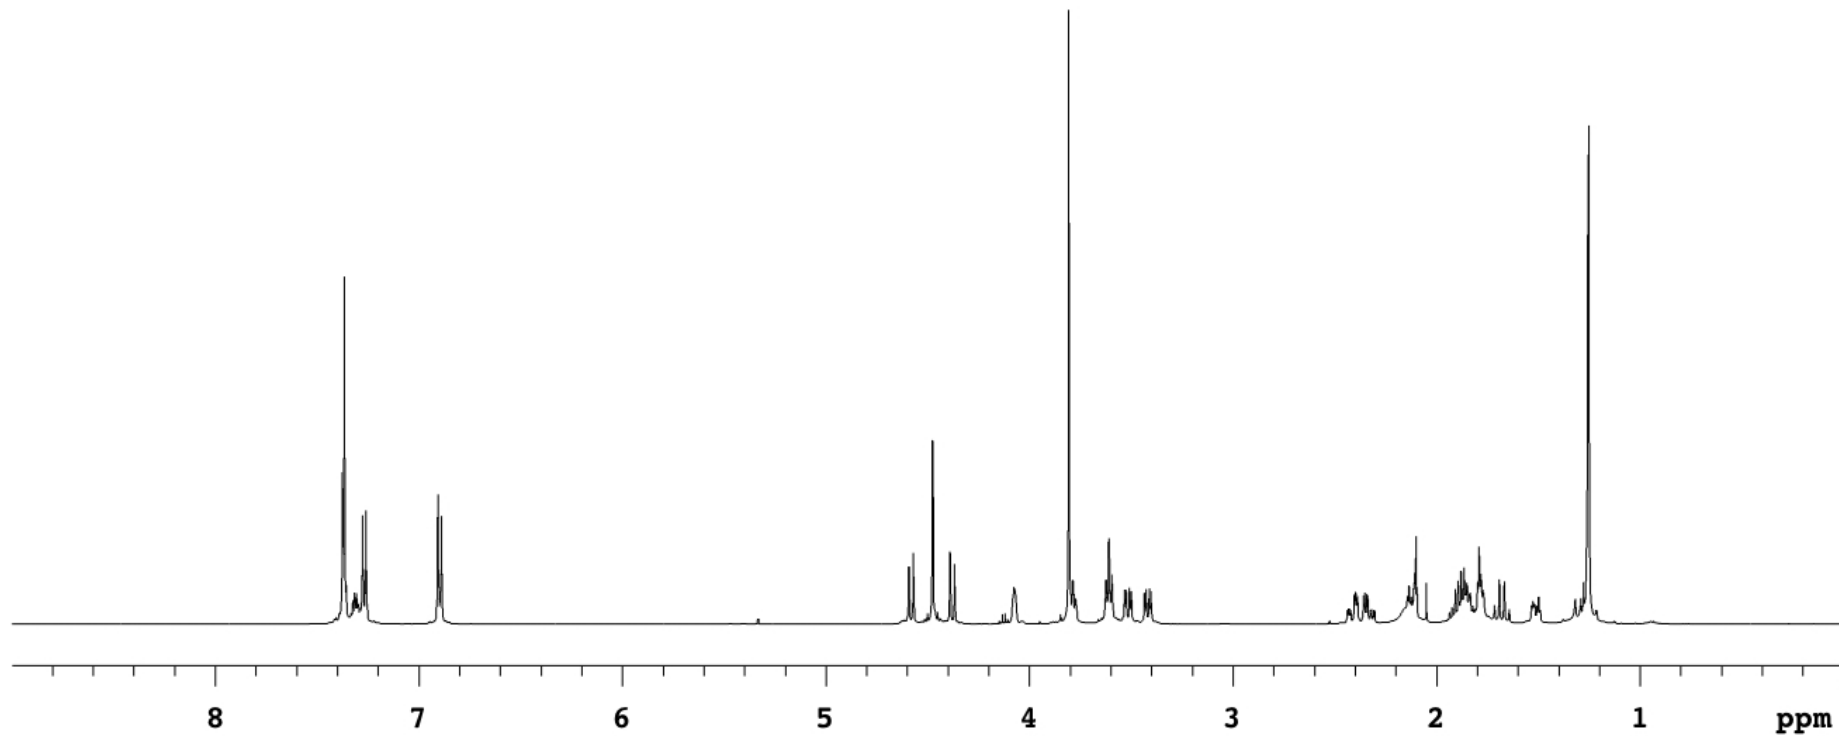

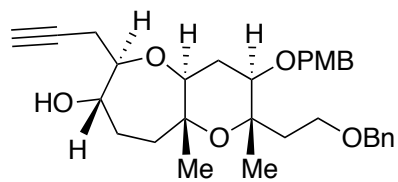

12

$^{13}\text{C}$  NMR, 125 MHz,  $\text{CD}_2\text{Cl}_2$

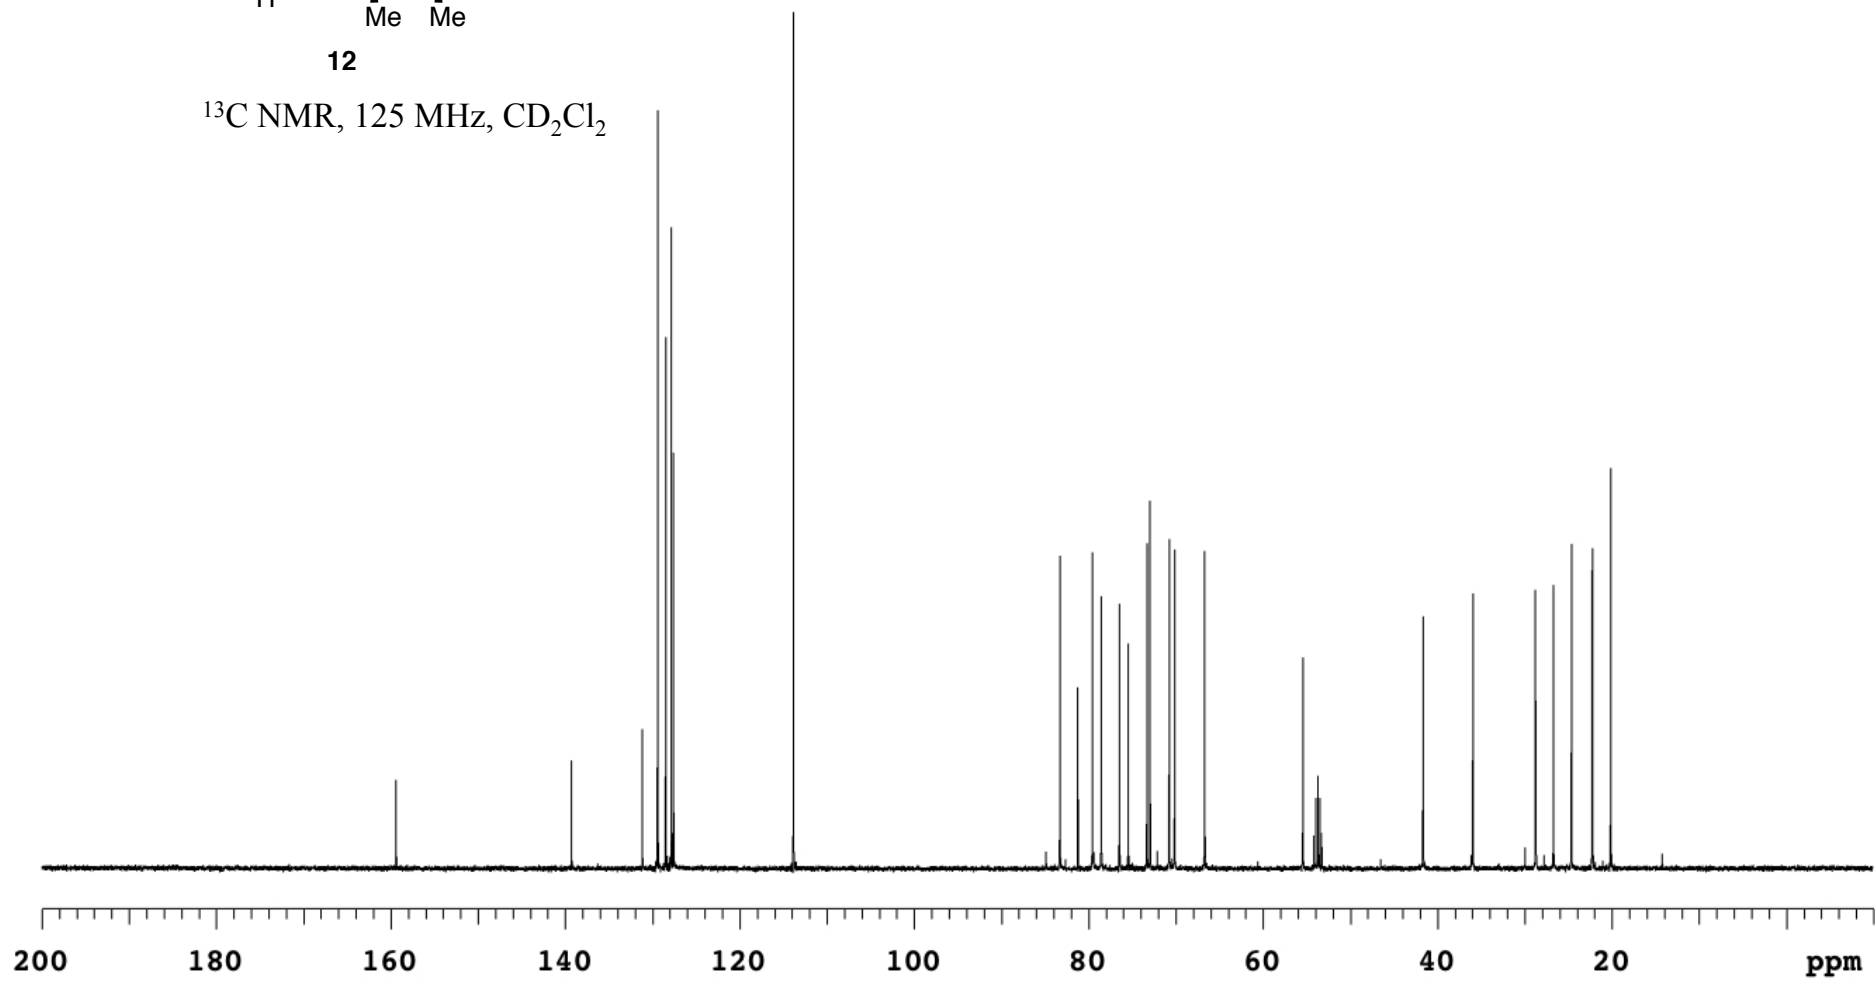

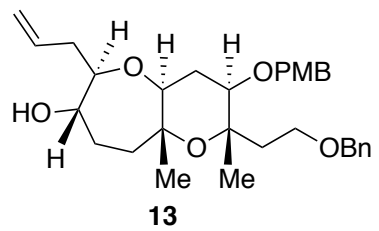

$^1\text{H}$  NMR, 500 MHz,  $\text{CD}_2\text{Cl}_2$

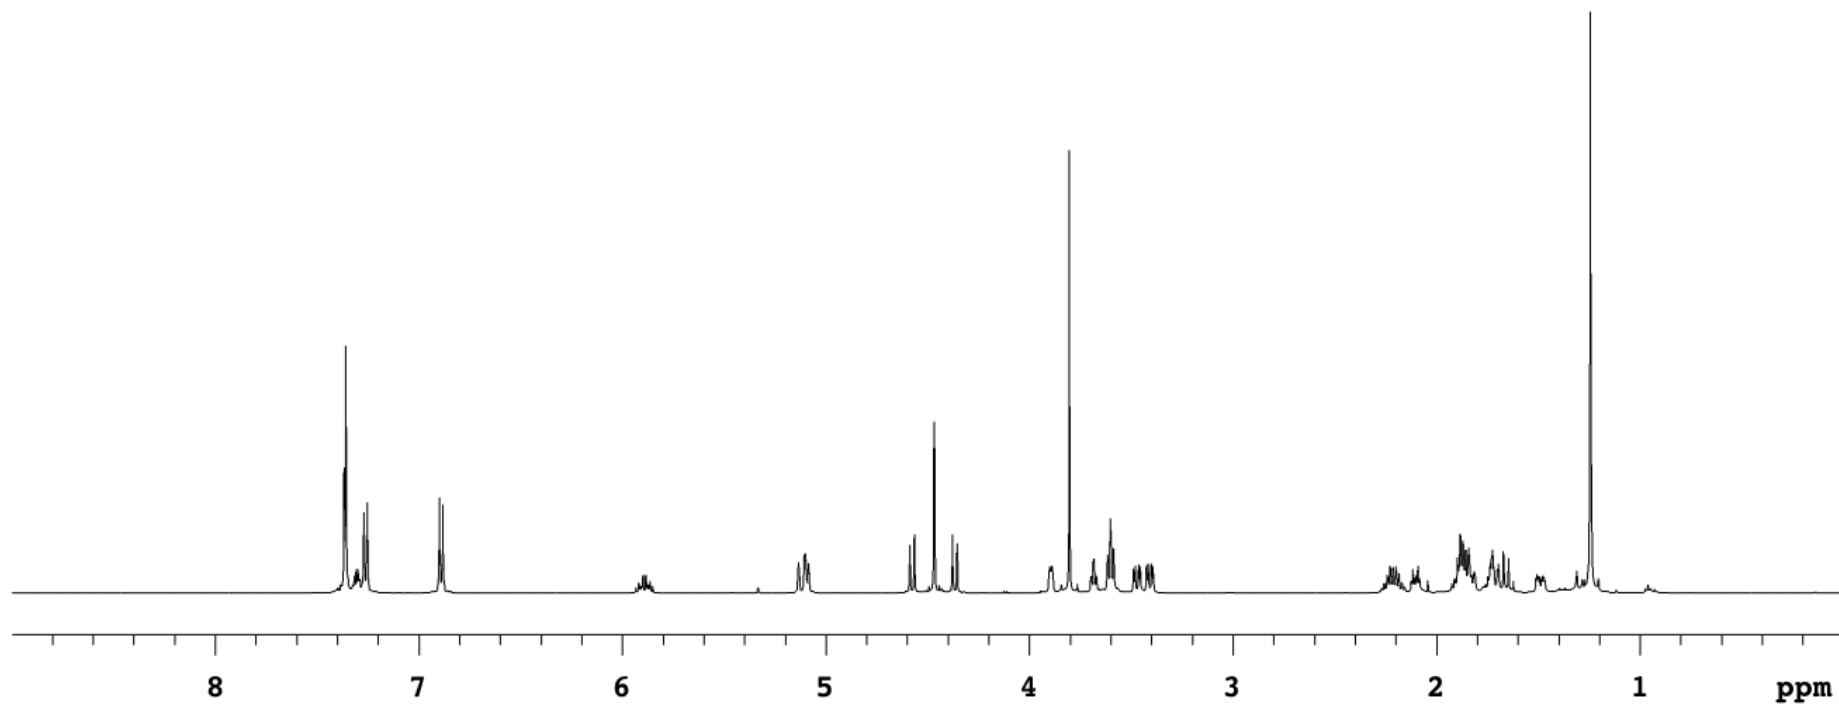

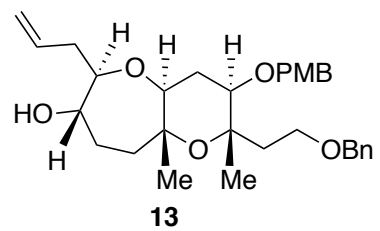

$^{13}\text{C}$  NMR, 125 MHz,  $\text{CD}_2\text{Cl}_2$

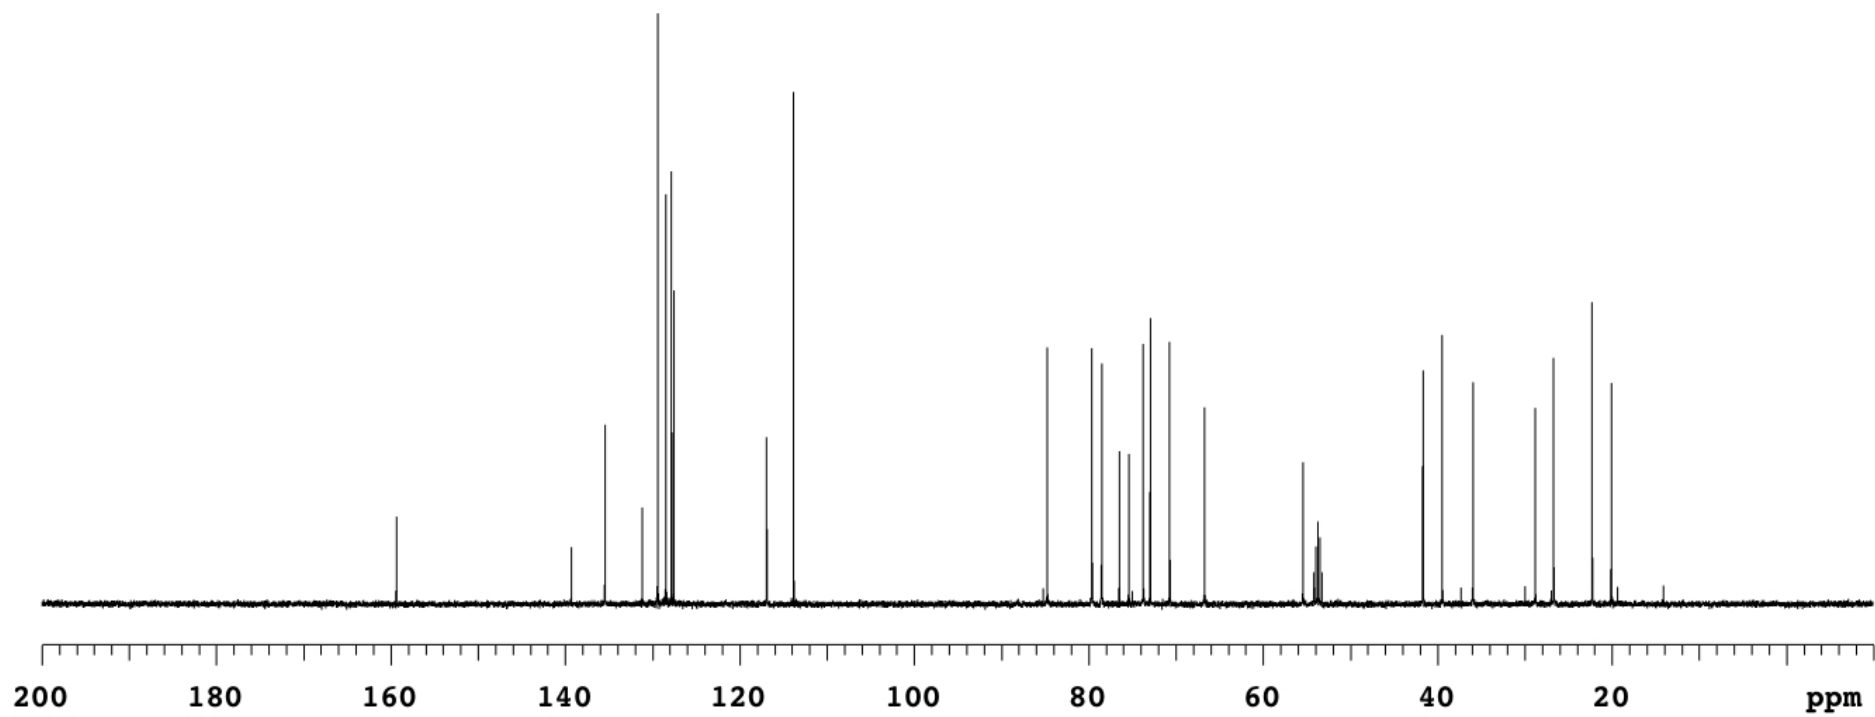











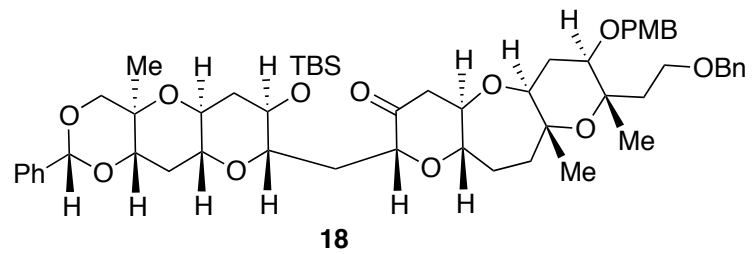

$^1\text{H NMR}$ , 500 MHz,  $\text{C}_6\text{D}_6$

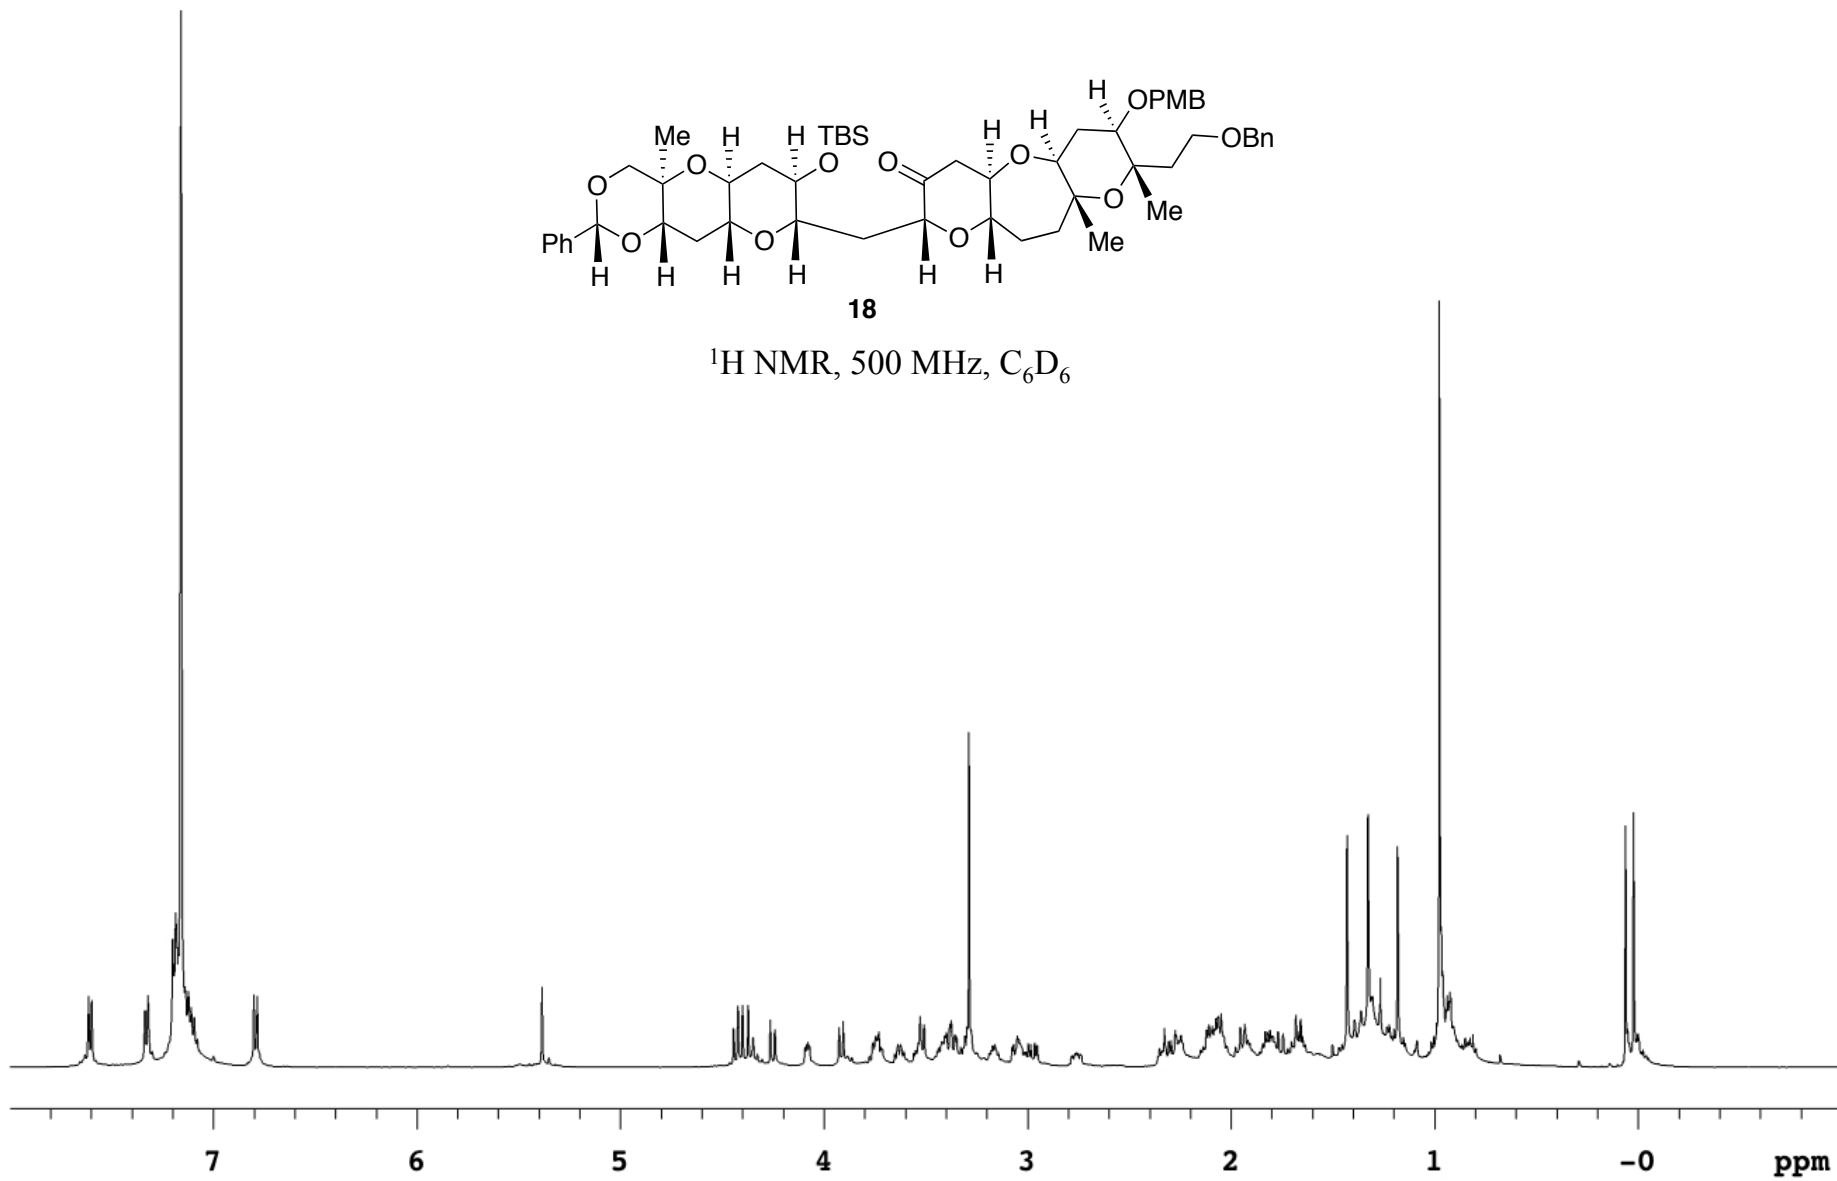





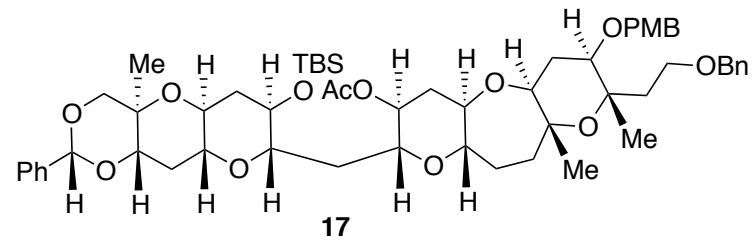

$^{13}\text{C}$  NMR, 125 MHz,  $\text{C}_6\text{D}_6$

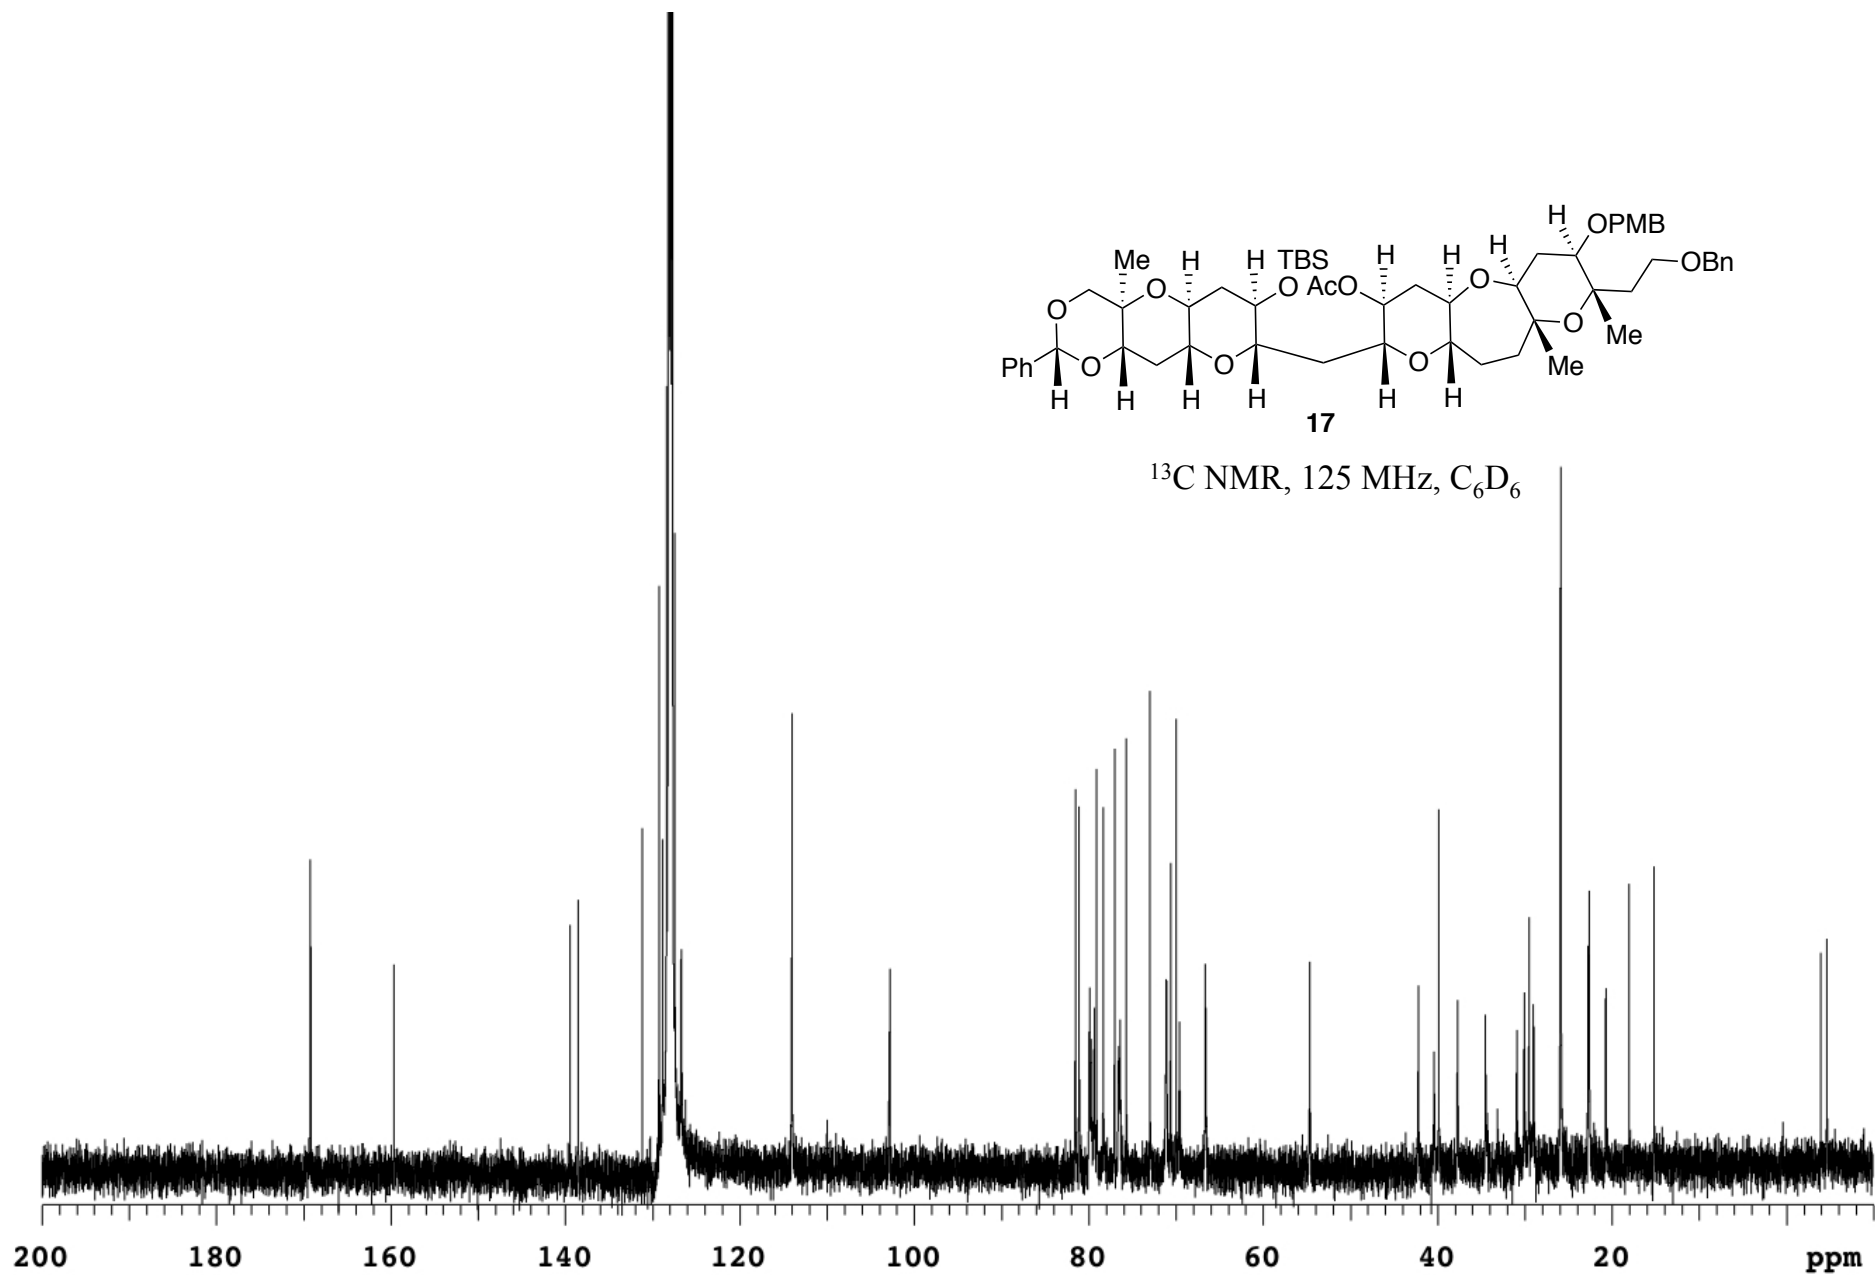

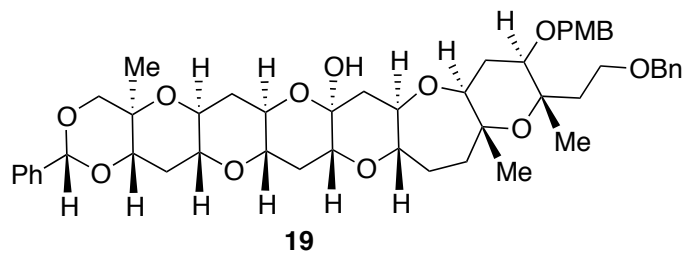

$^1\text{H}$  NMR, 500 MHz,  $\text{CD}_2\text{Cl}_2$

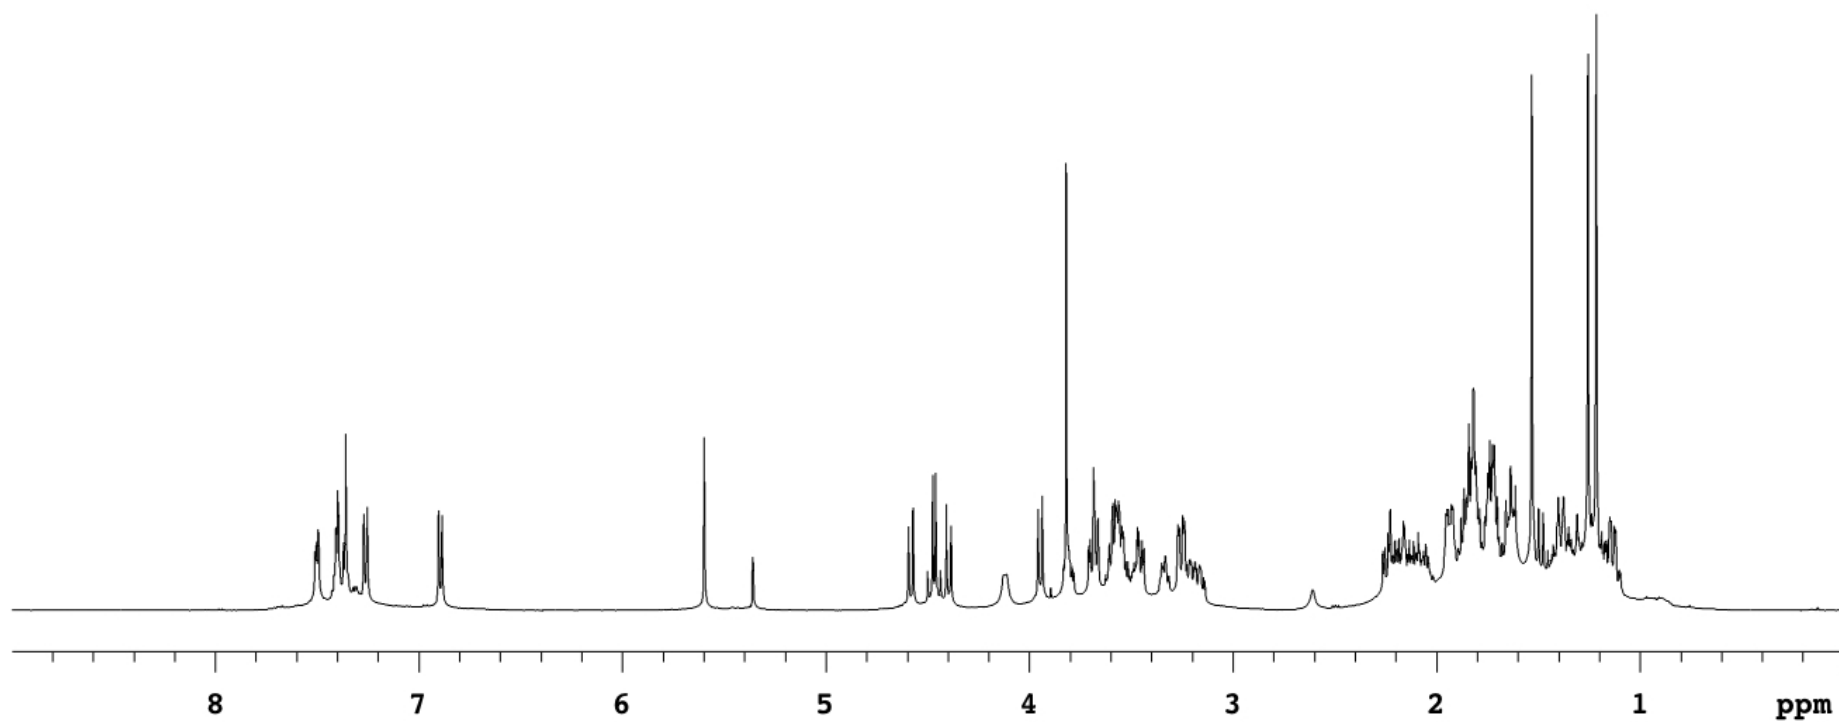









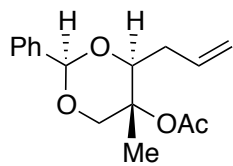

23

<sup>1</sup>H NMR, 500 MHz, C<sub>6</sub>D<sub>6</sub>

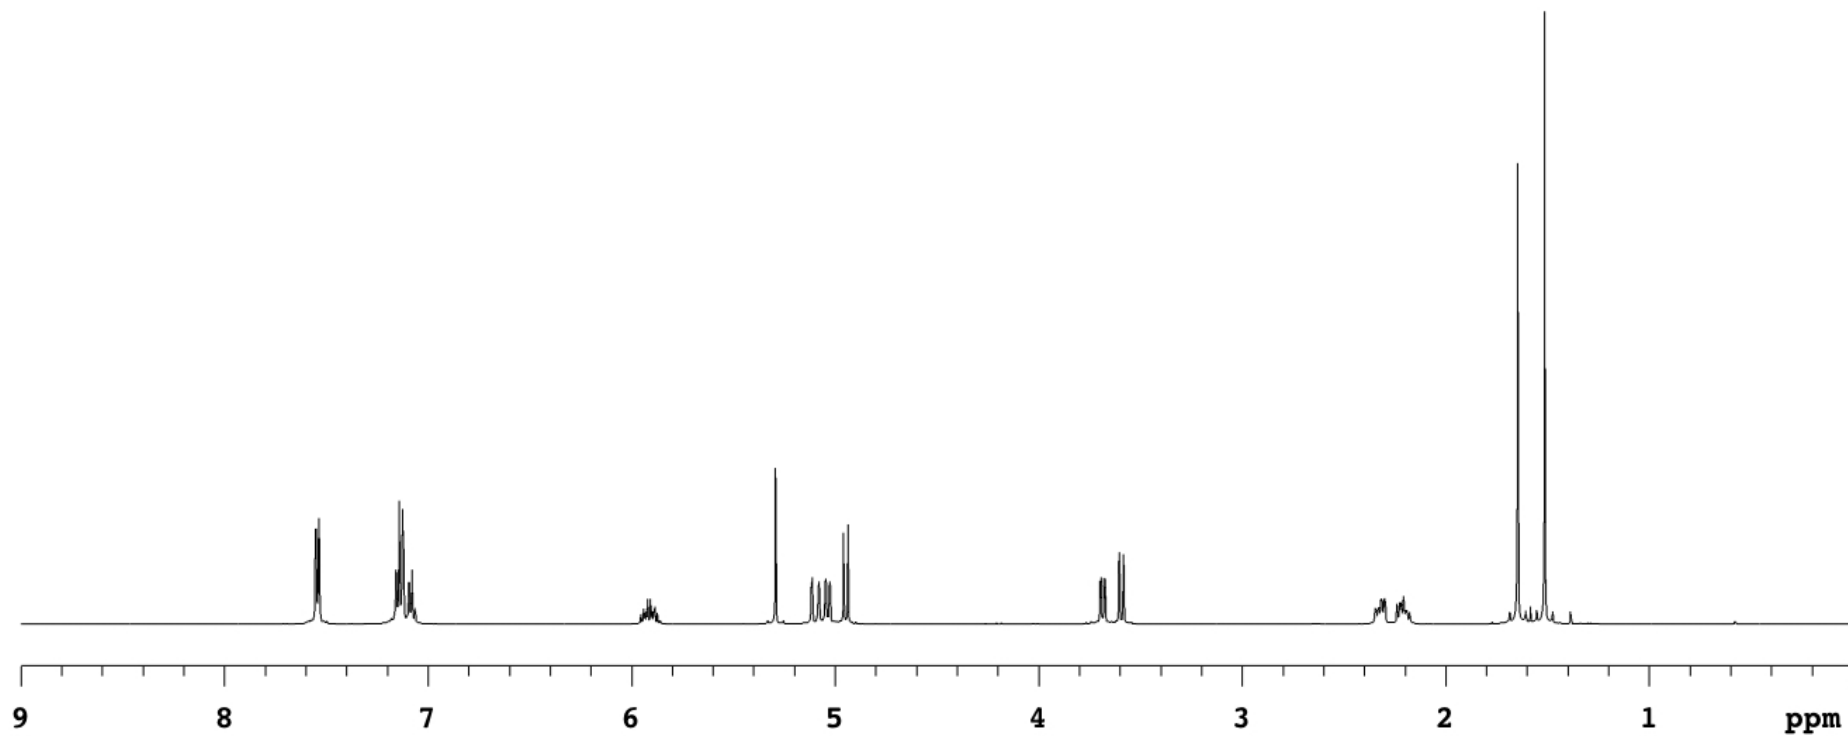

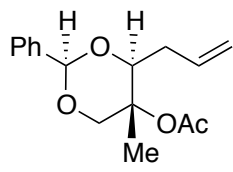

23

<sup>13</sup>C NMR, 125 MHz, C<sub>6</sub>D<sub>6</sub>

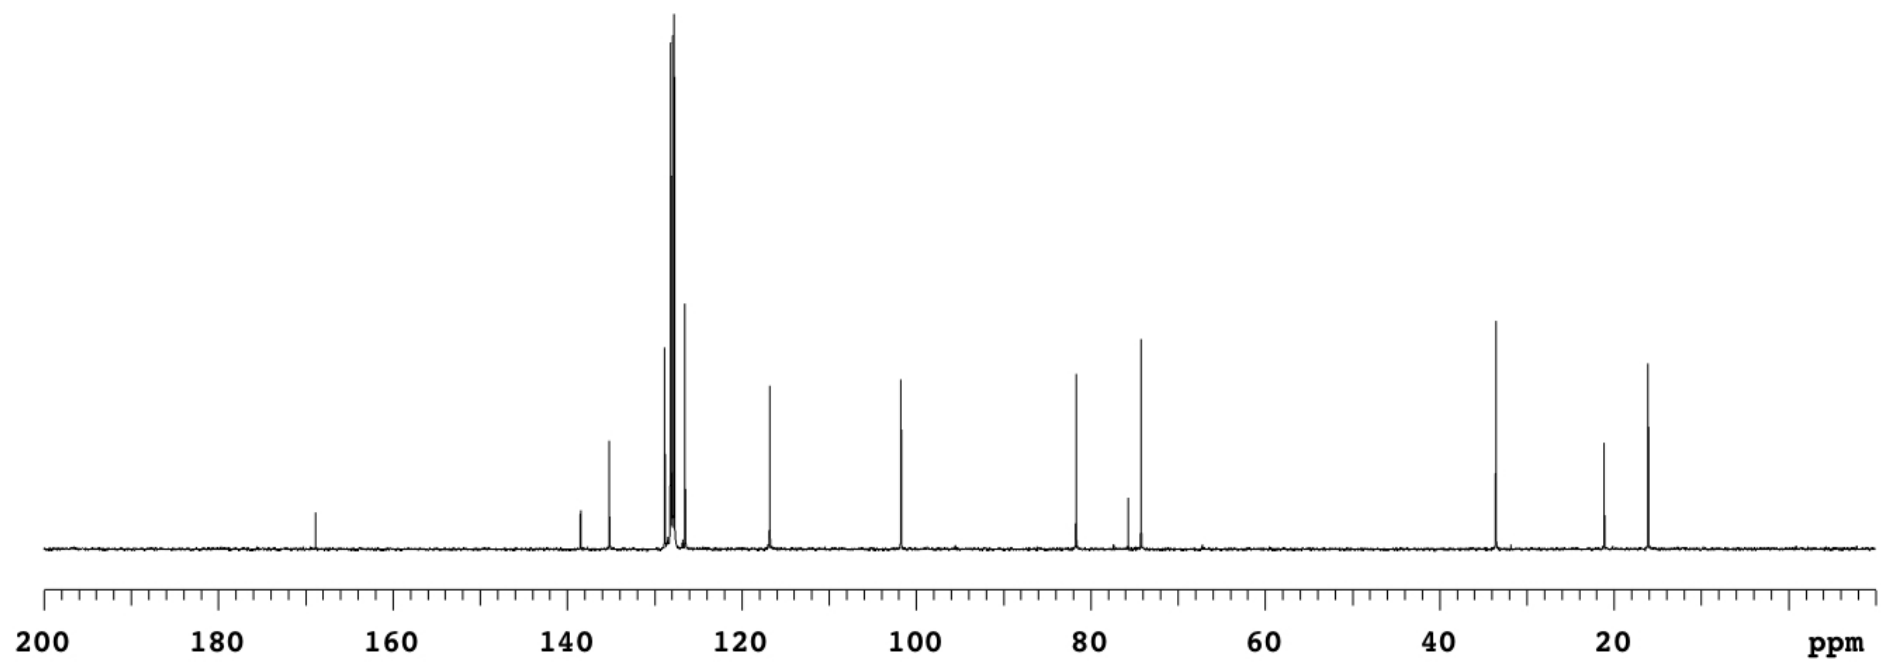

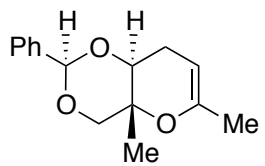

24

$^1\text{H}$  NMR, 500 MHz,  $\text{C}_6\text{D}_6$

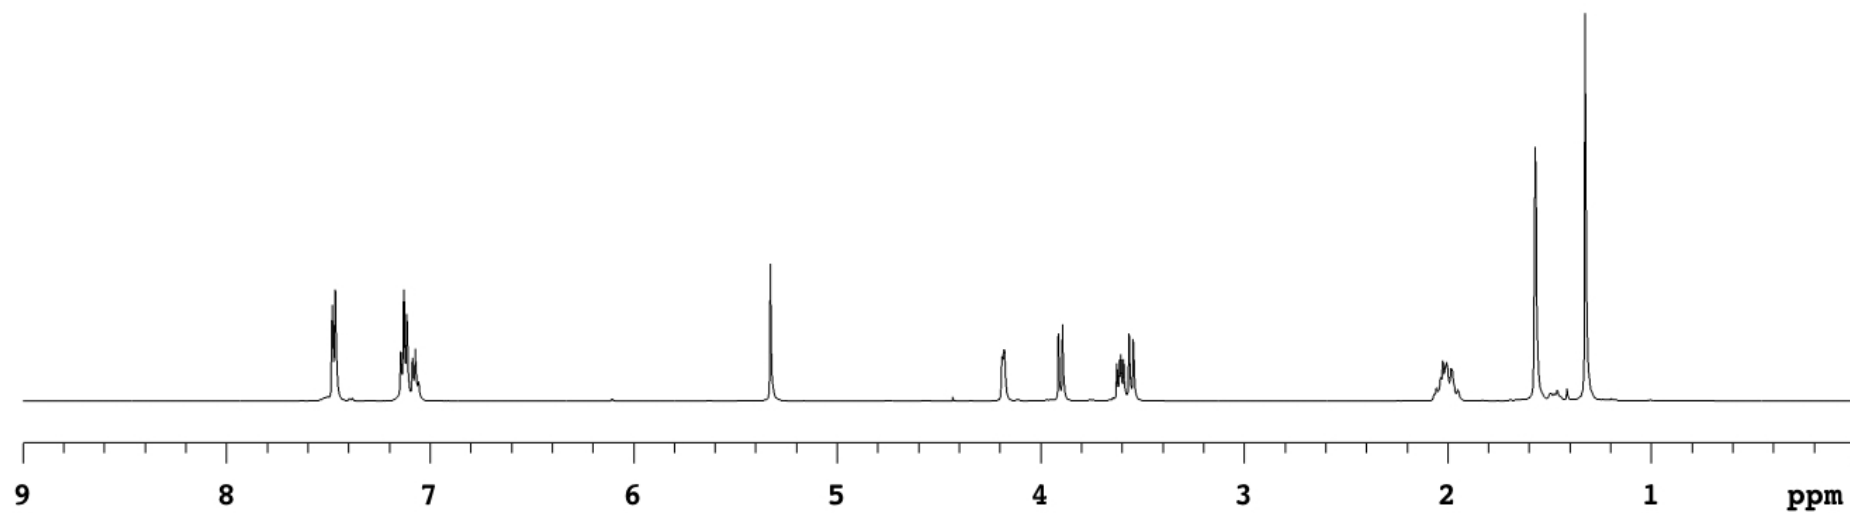

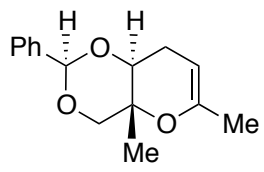

24

$^{13}\text{C}$  NMR, 125 MHz,  $\text{C}_6\text{D}_6$

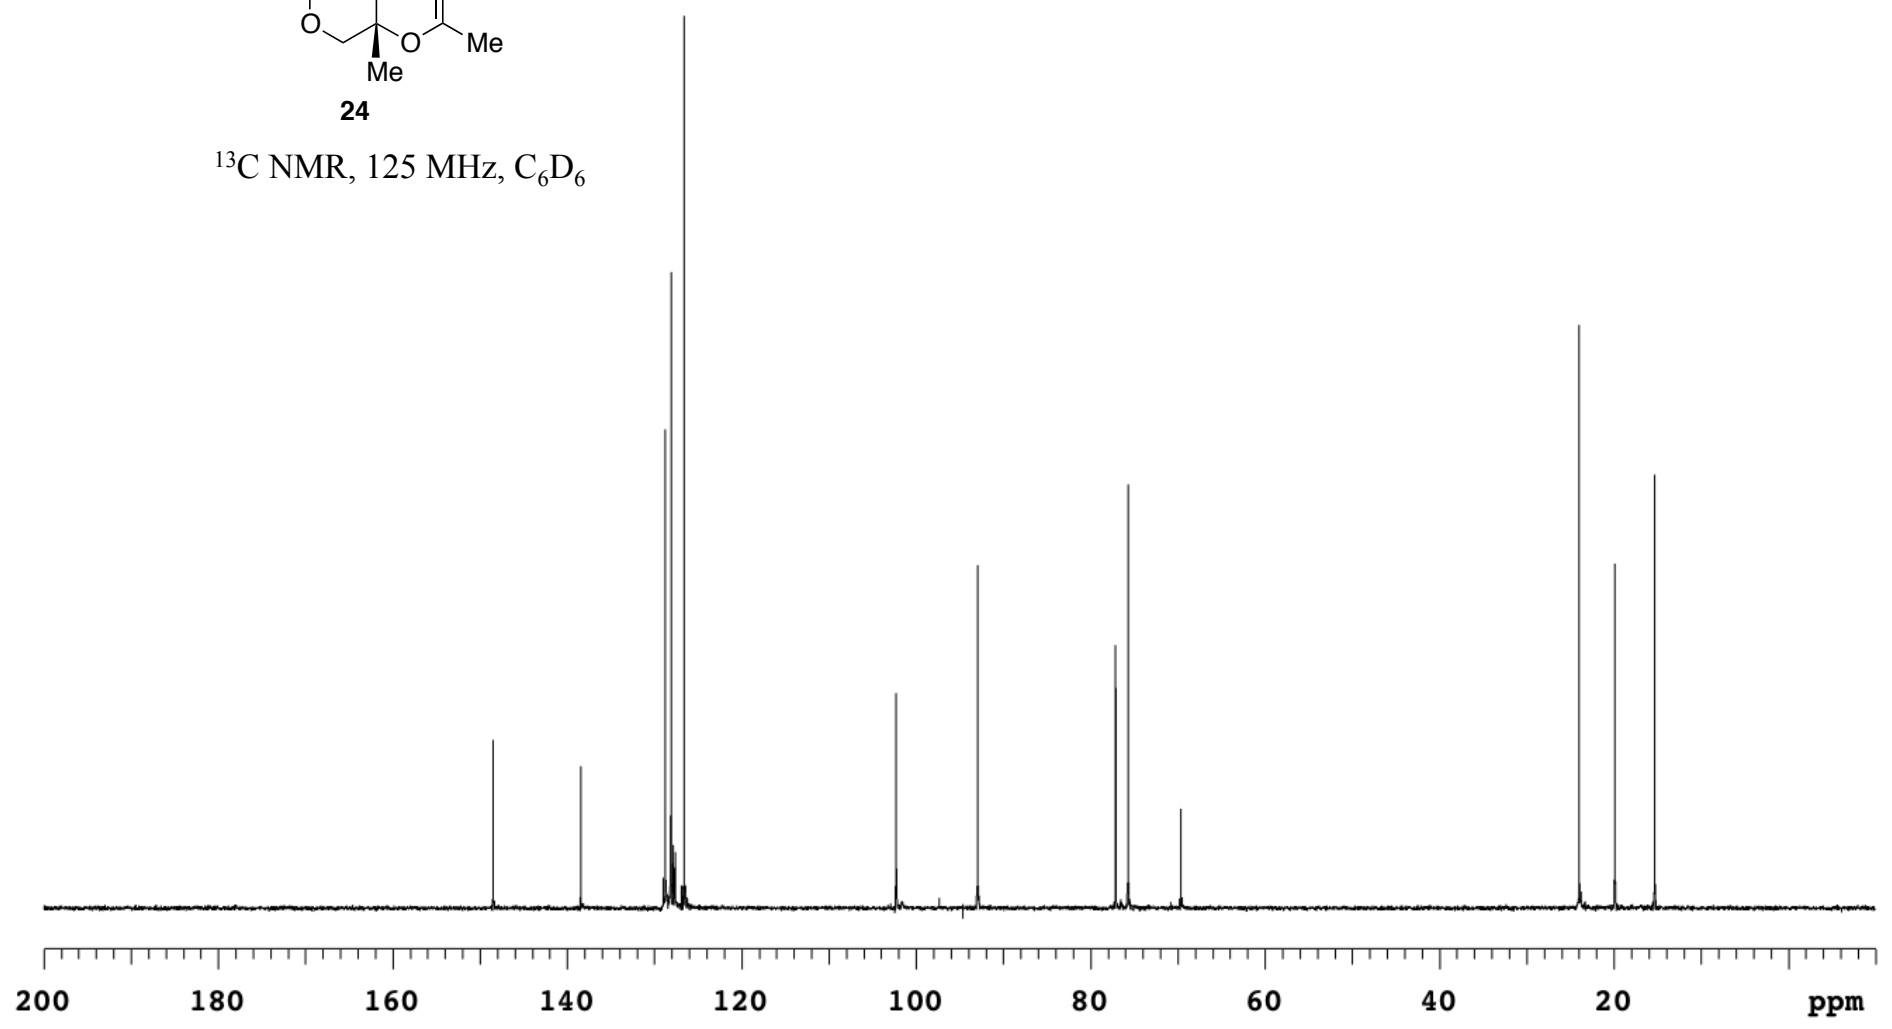

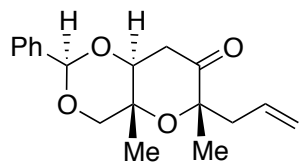

26

$^1\text{H}$  NMR, 500 MHz,  $\text{C}_6\text{D}_6$

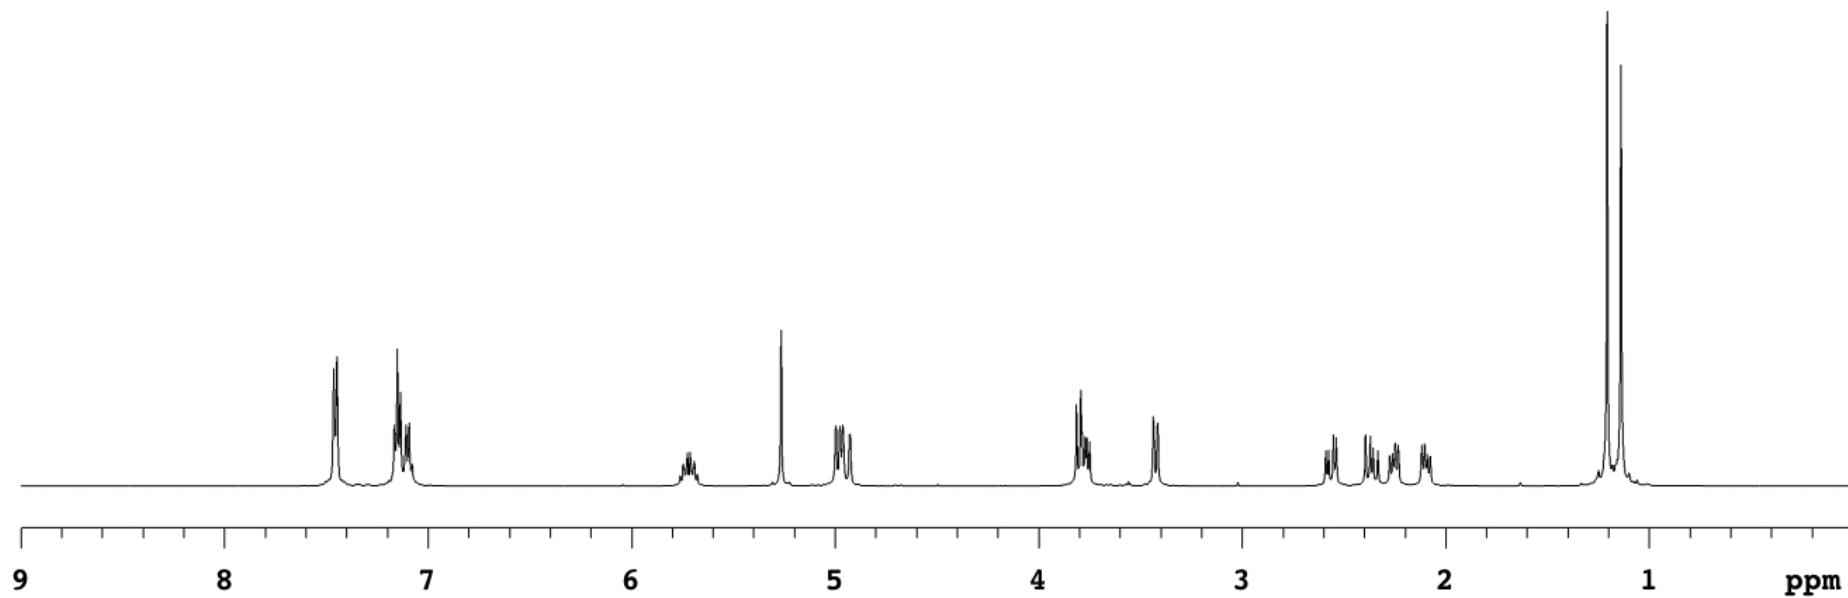

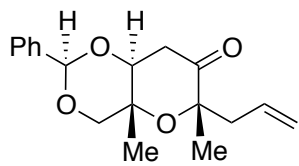

26

$^{13}\text{C}$  NMR, 100 MHz,  $\text{C}_6\text{D}_6$

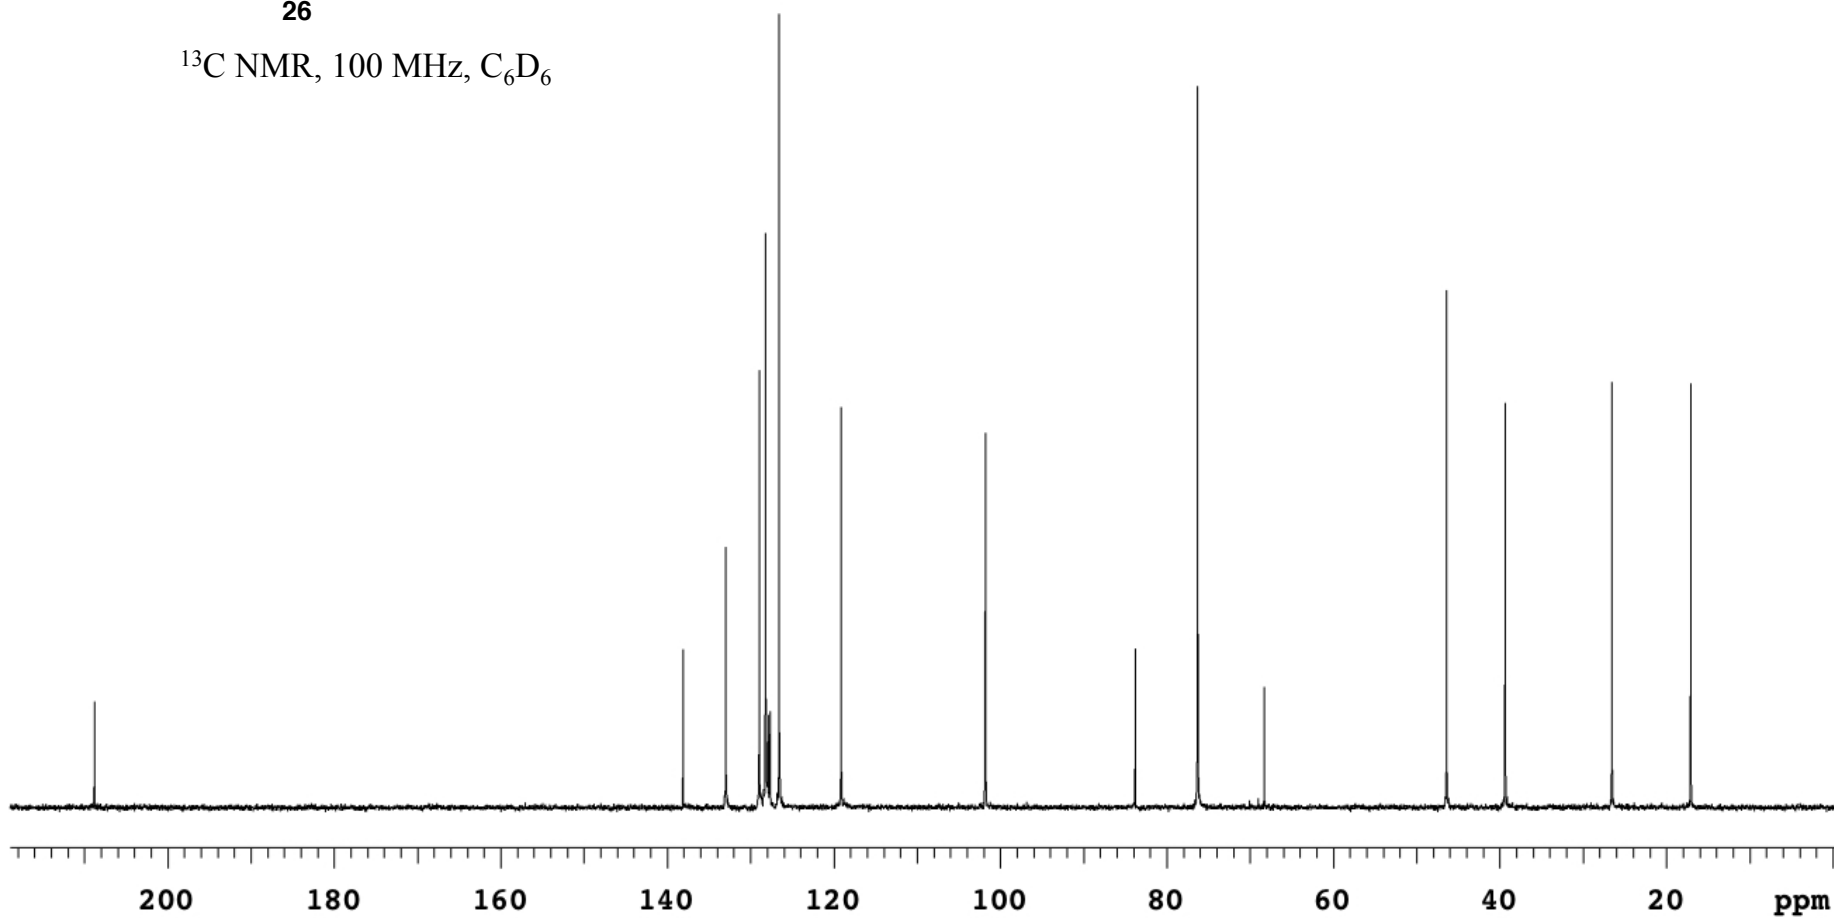

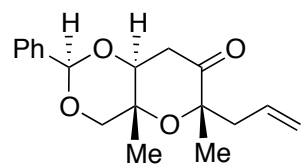

26

COSY, 500 MHz, C<sub>6</sub>D<sub>6</sub>

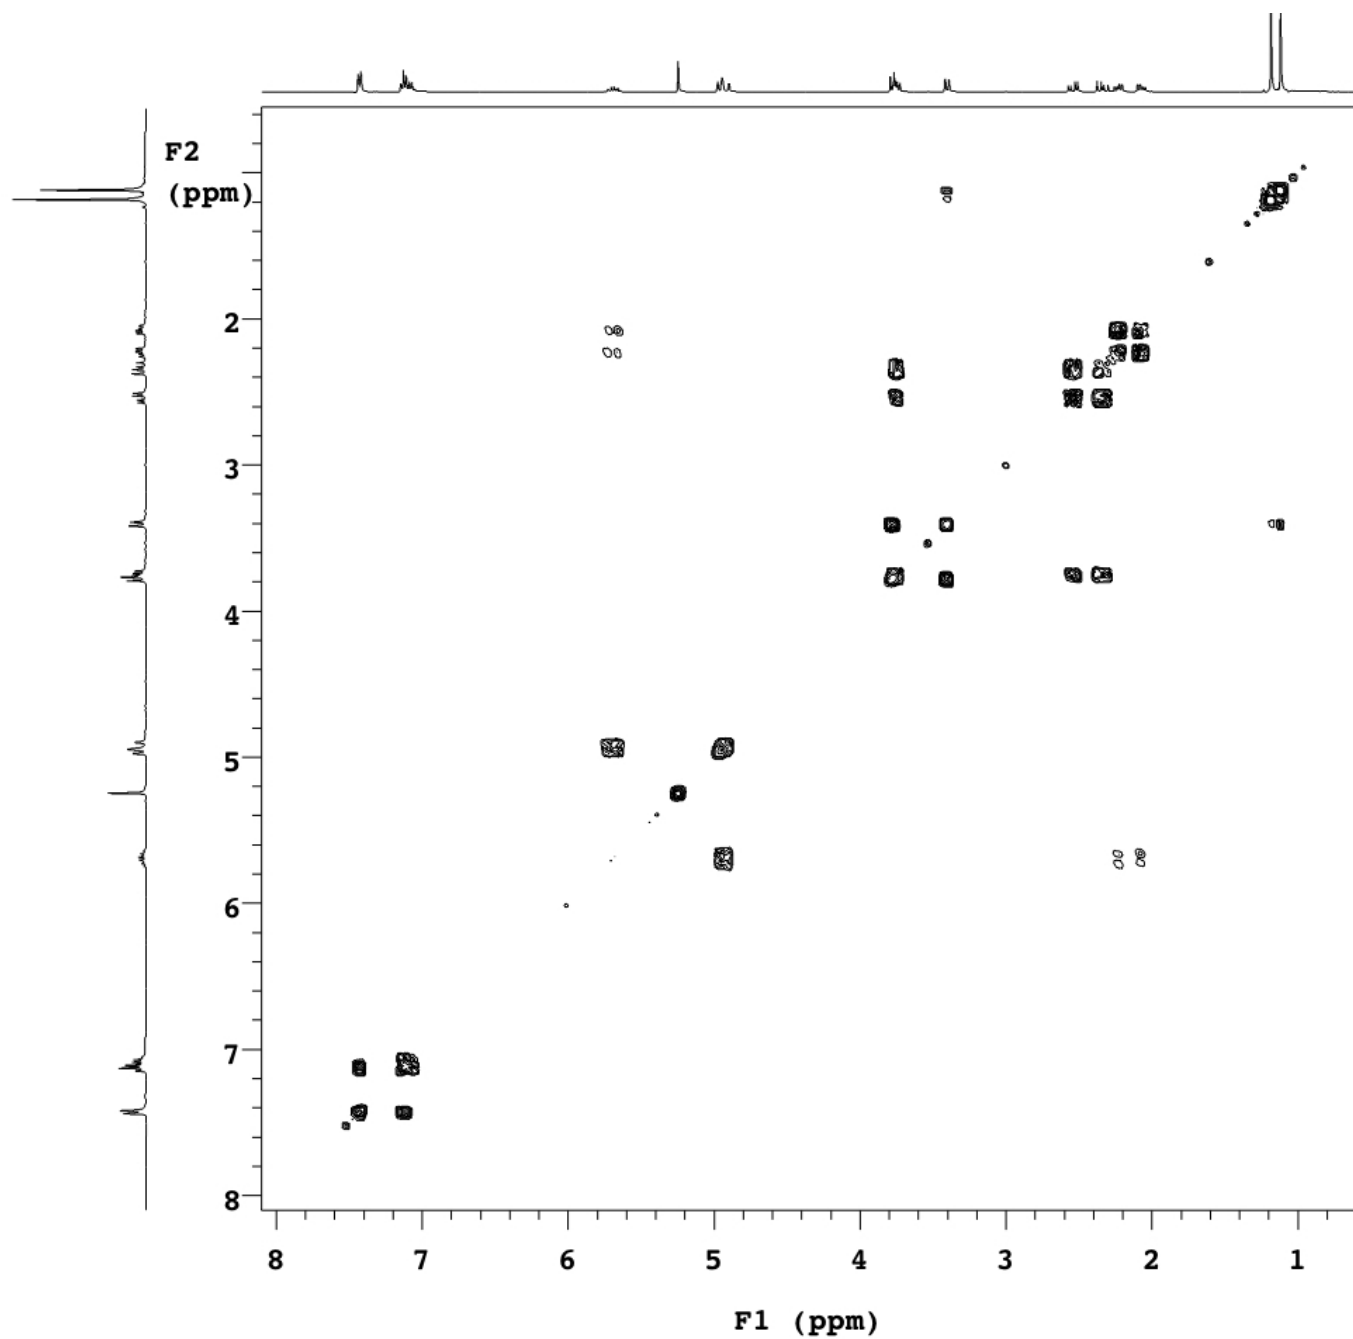

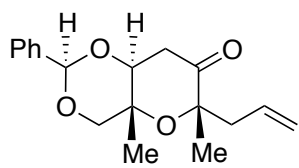

26

nOe1d, 500 MHz, C<sub>6</sub>D<sub>6</sub>

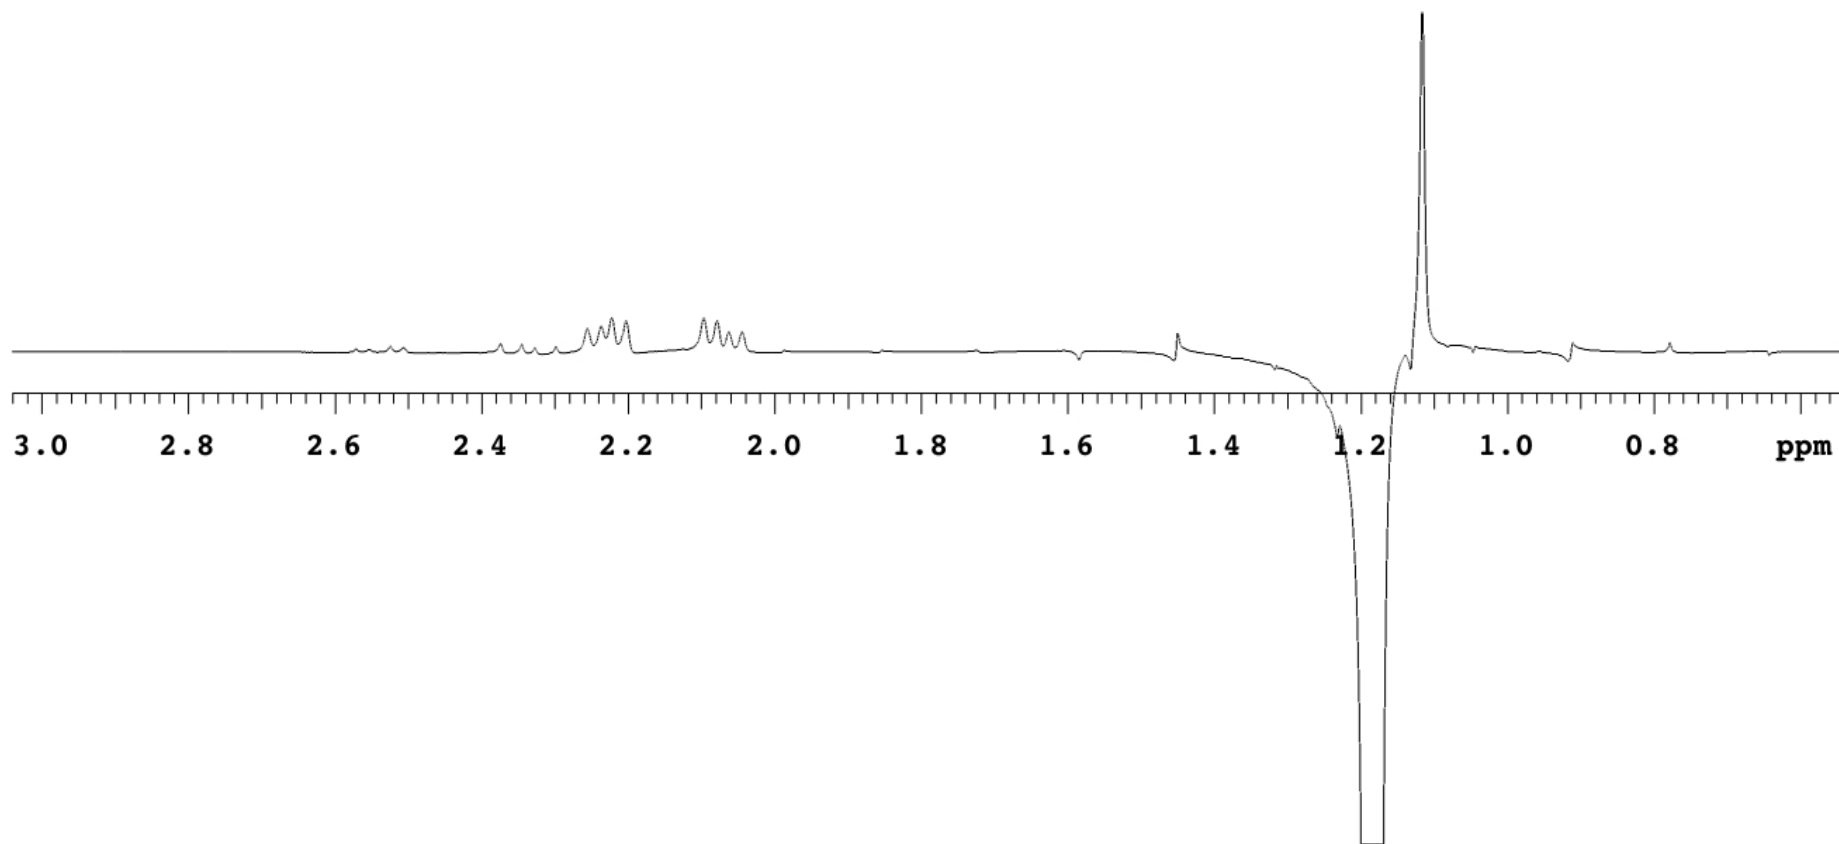



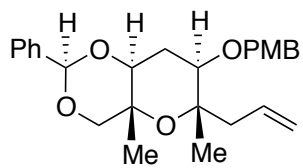

27

$^1\text{H NMR}$ , 500 MHz,  $\text{C}_6\text{D}_6$

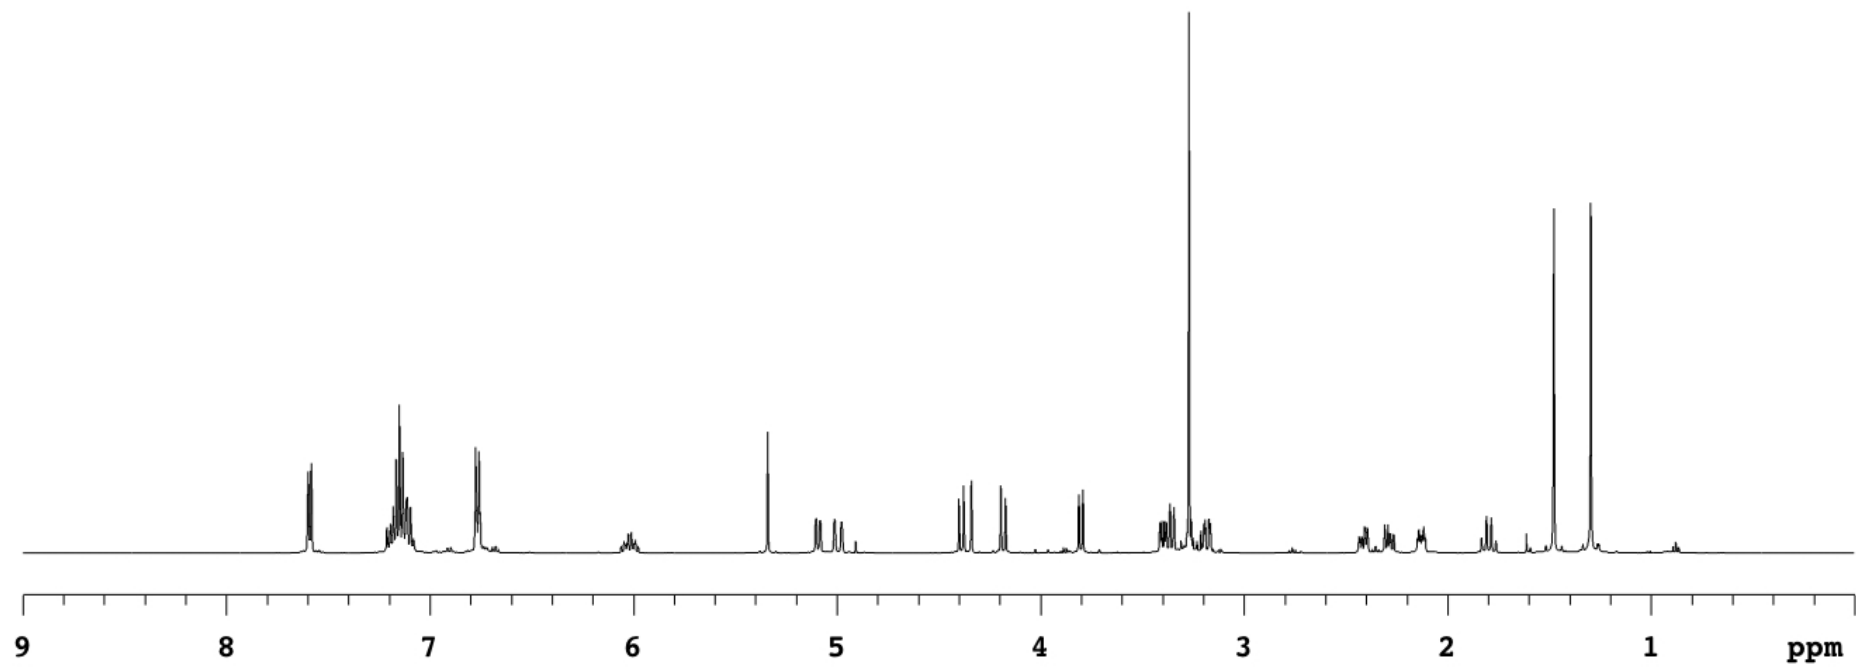

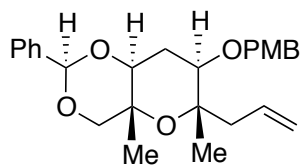

27

$^{13}\text{C}$  NMR, 125 MHz,  $\text{C}_6\text{D}_6$

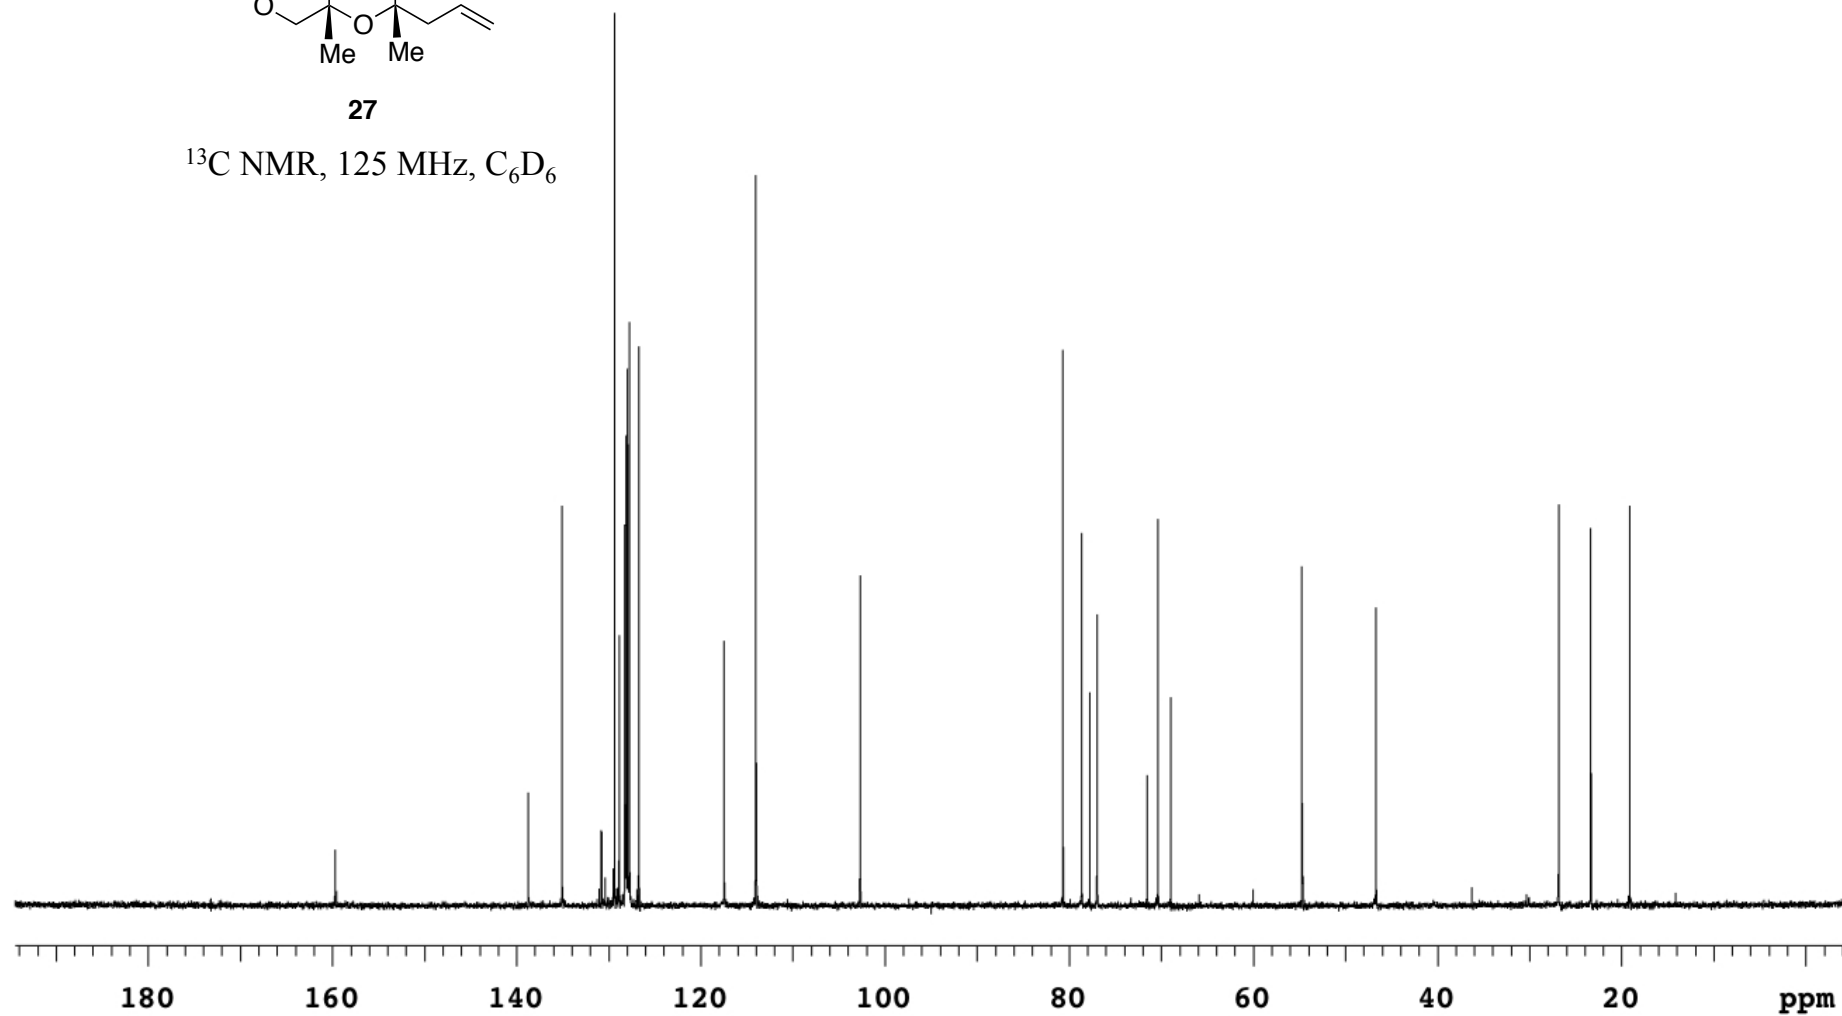

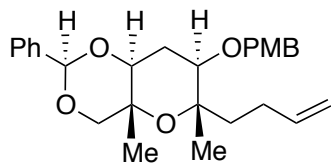

28

$^1\text{H}$  NMR, 500 MHz,  $\text{C}_6\text{D}_6$

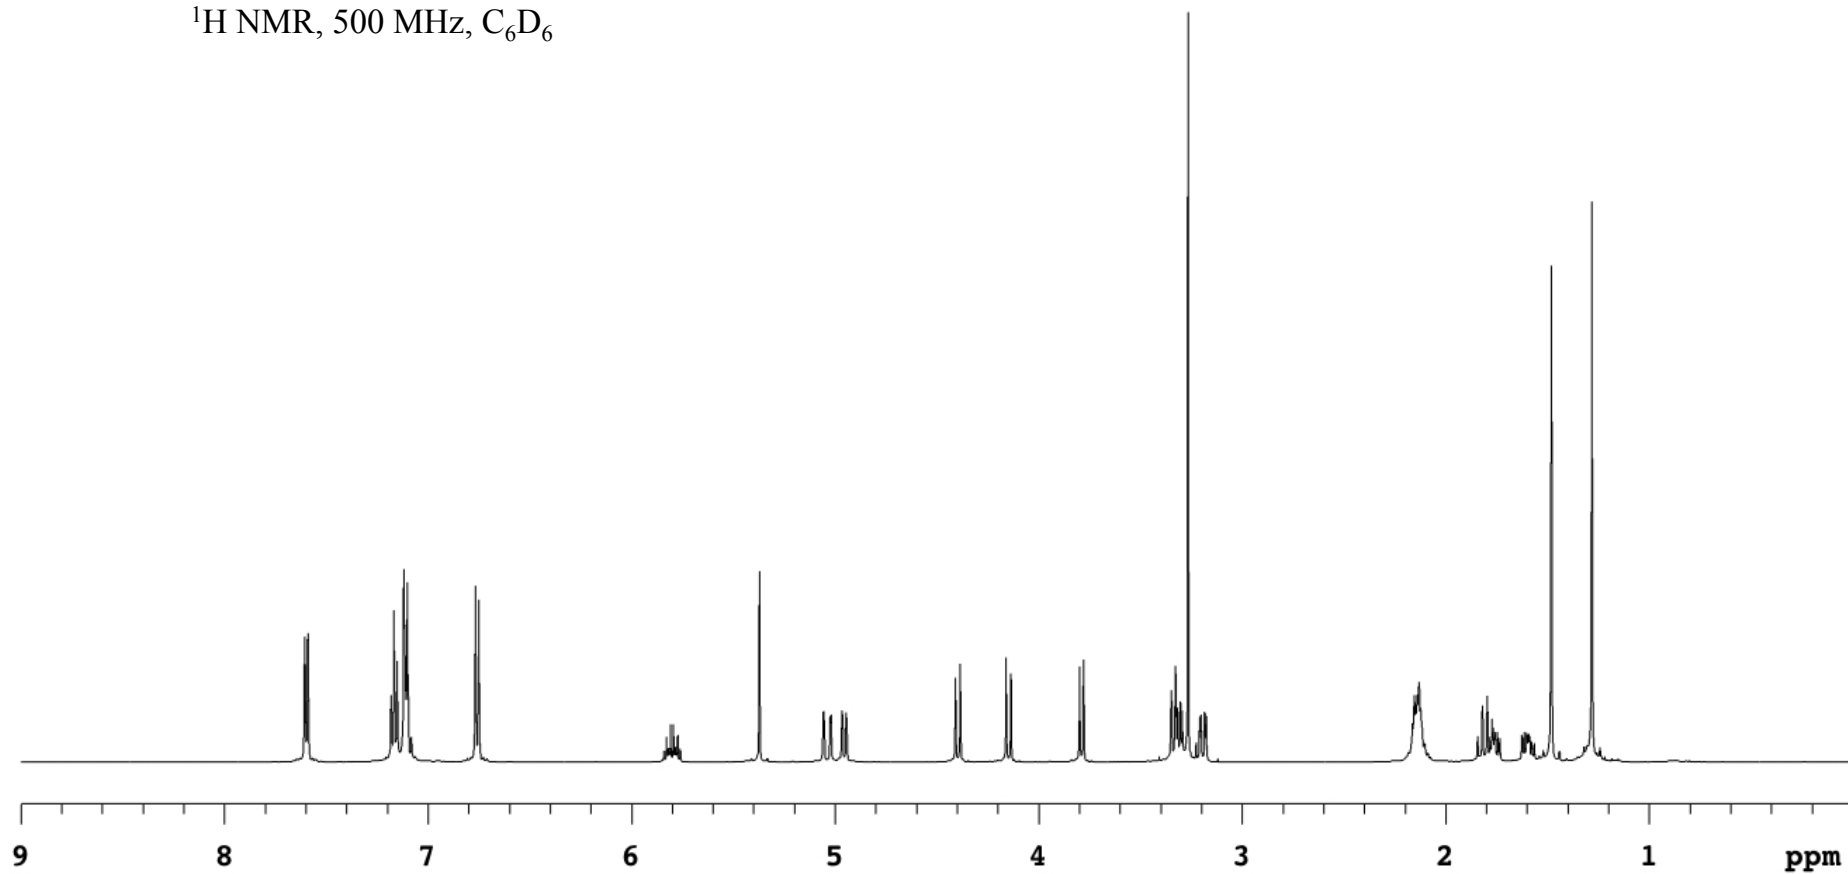

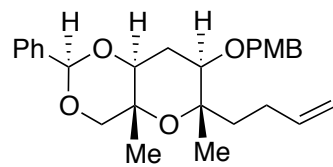

28

$^{13}\text{C}$  NMR, 125 MHz,  $\text{C}_6\text{D}_6$

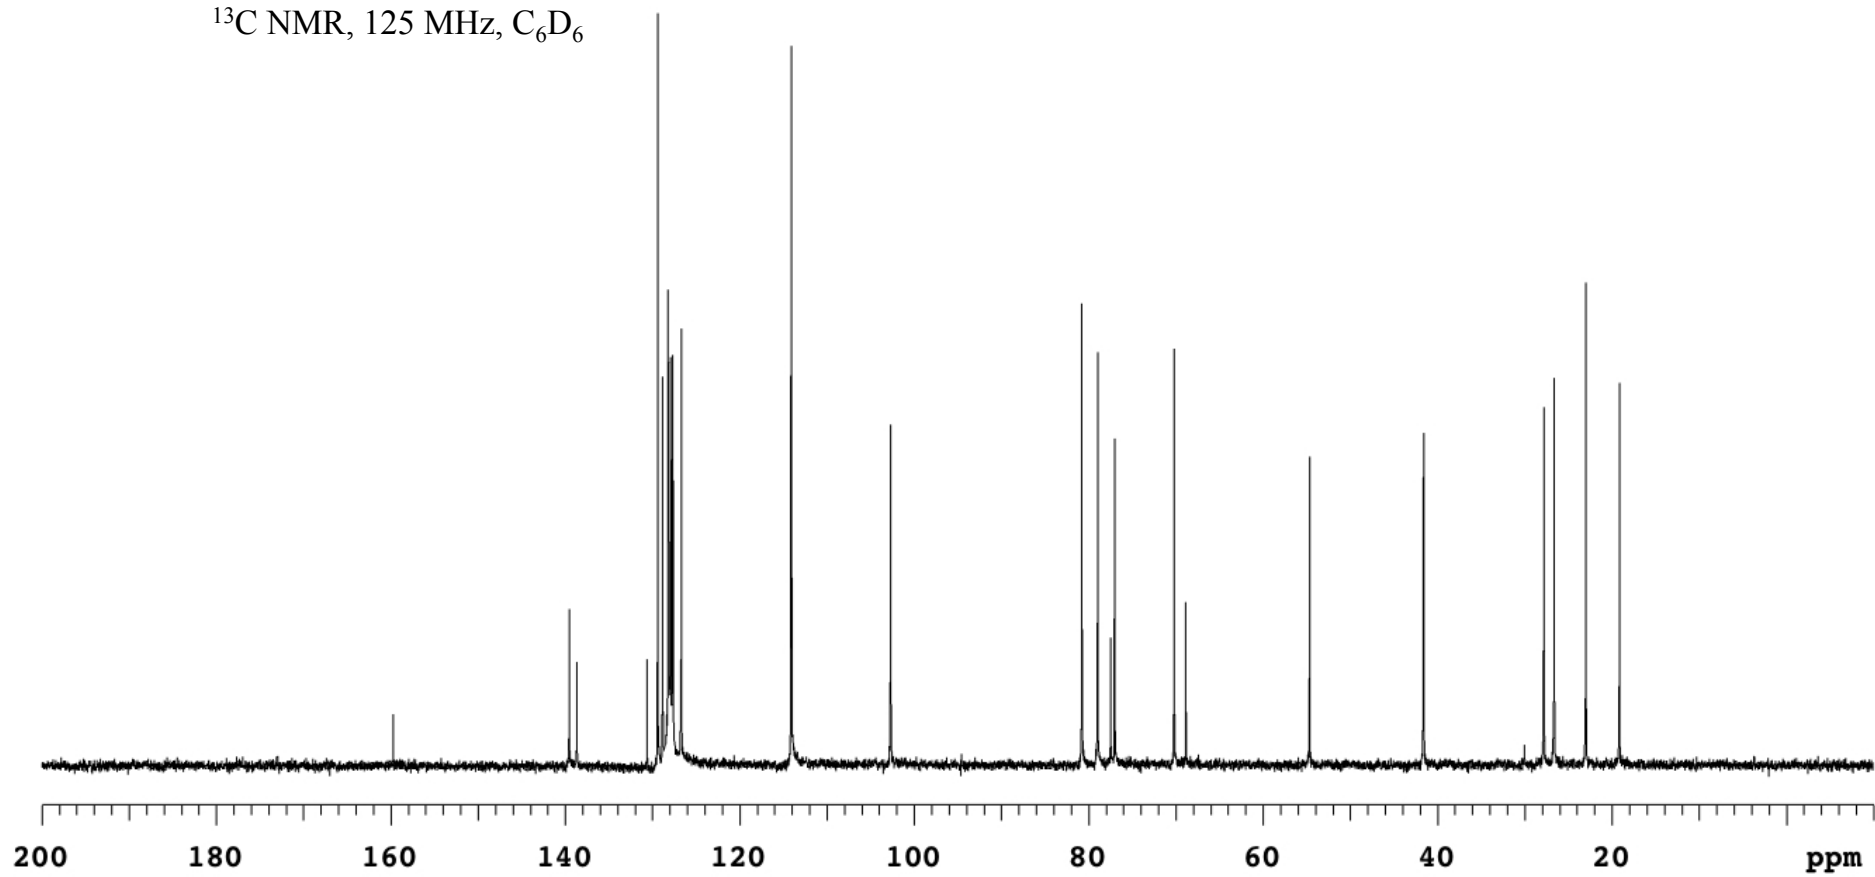

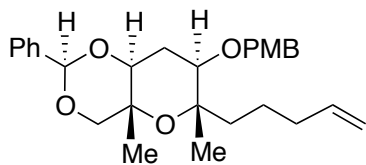

29

$^1\text{H NMR}$ , 500 MHz,  $\text{C}_6\text{D}_6$

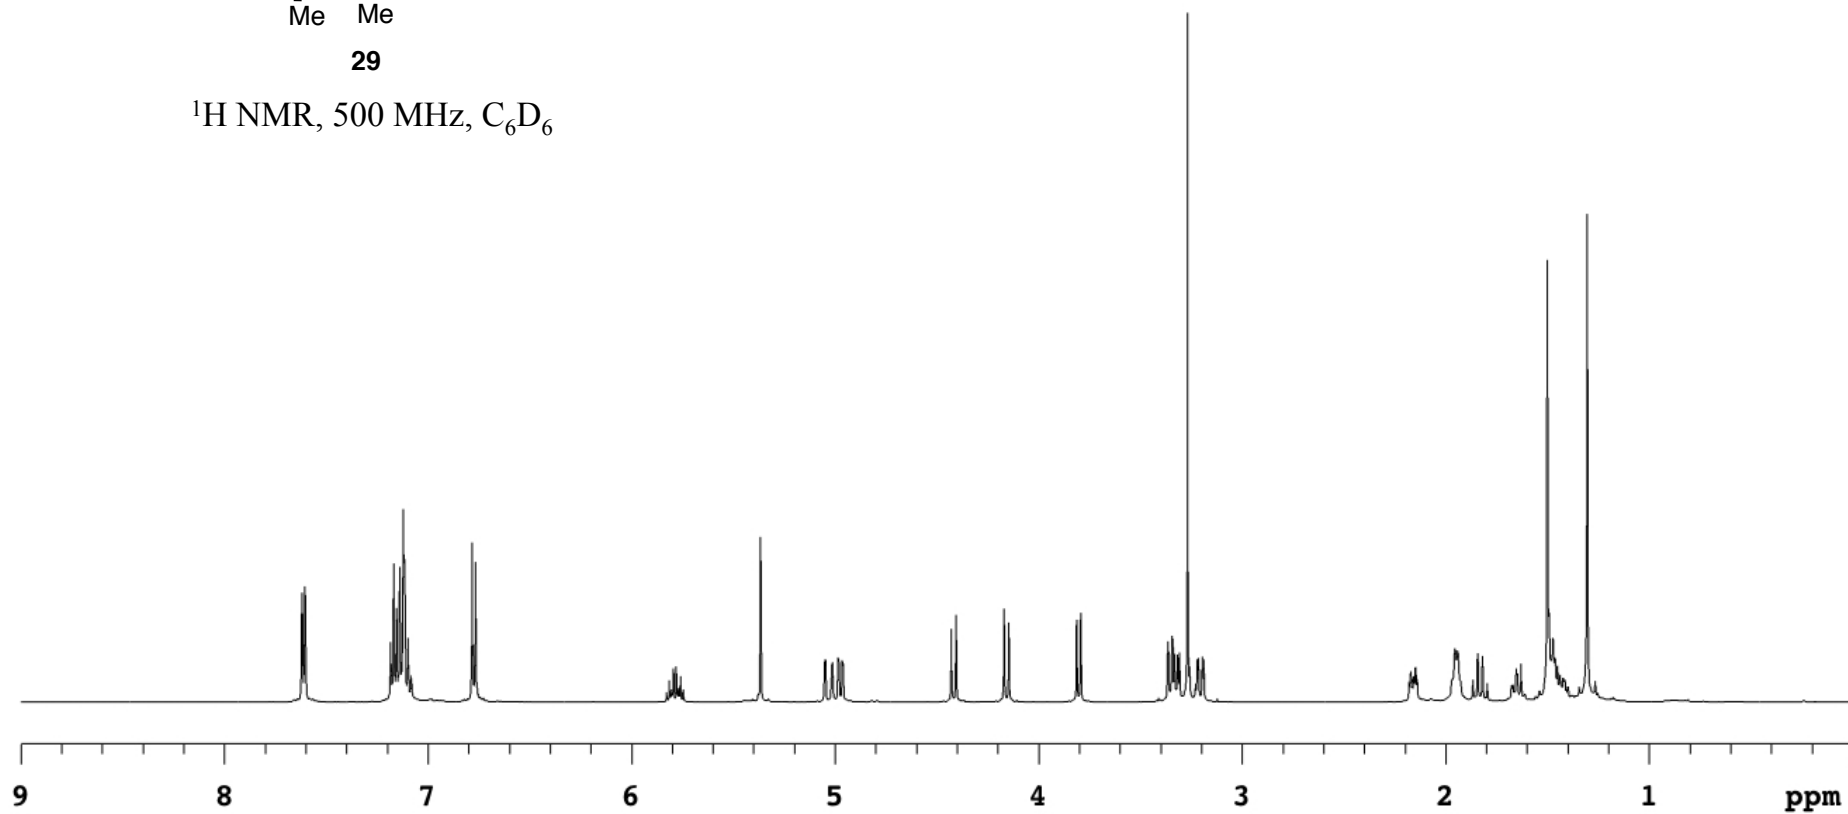

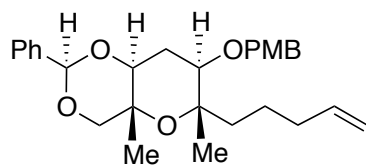

29

$^{13}\text{C}$  NMR, 125 MHz,  $\text{C}_6\text{D}_6$

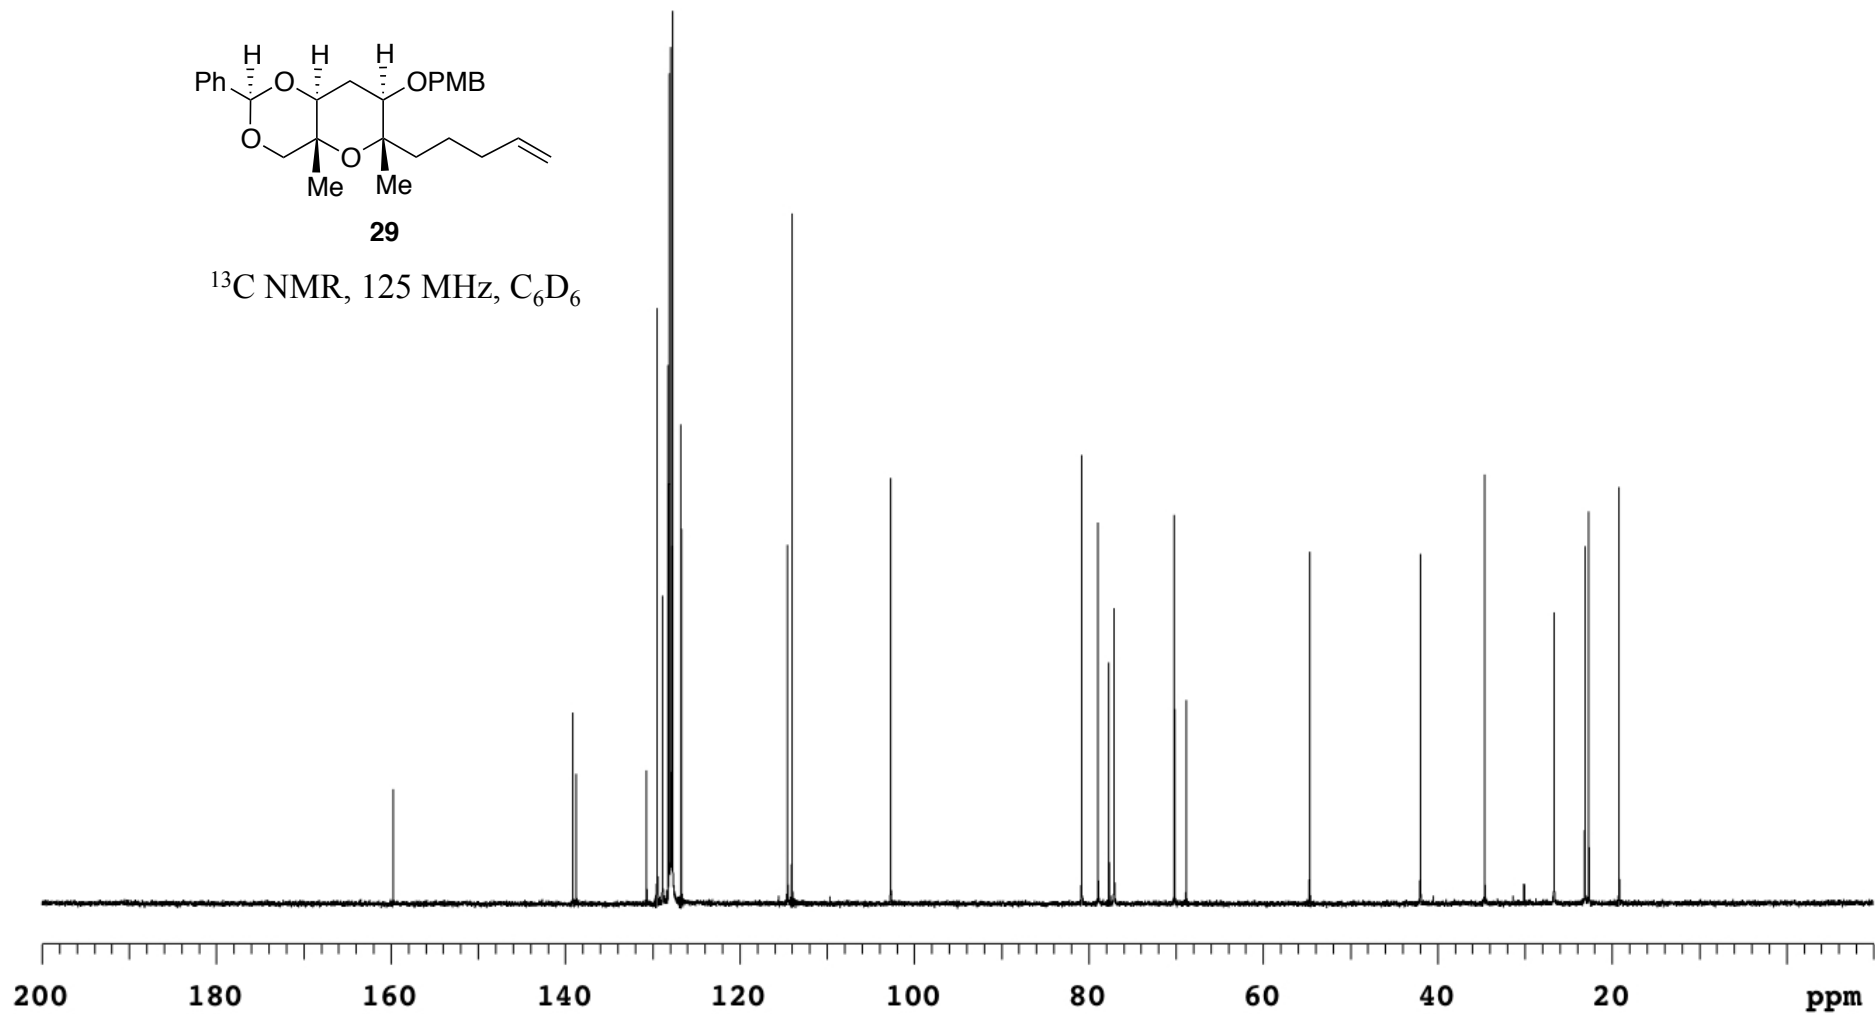

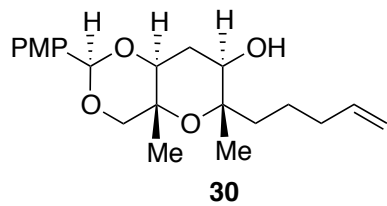

$^1\text{H}$  NMR, 500 MHz,  $\text{C}_6\text{D}_6$

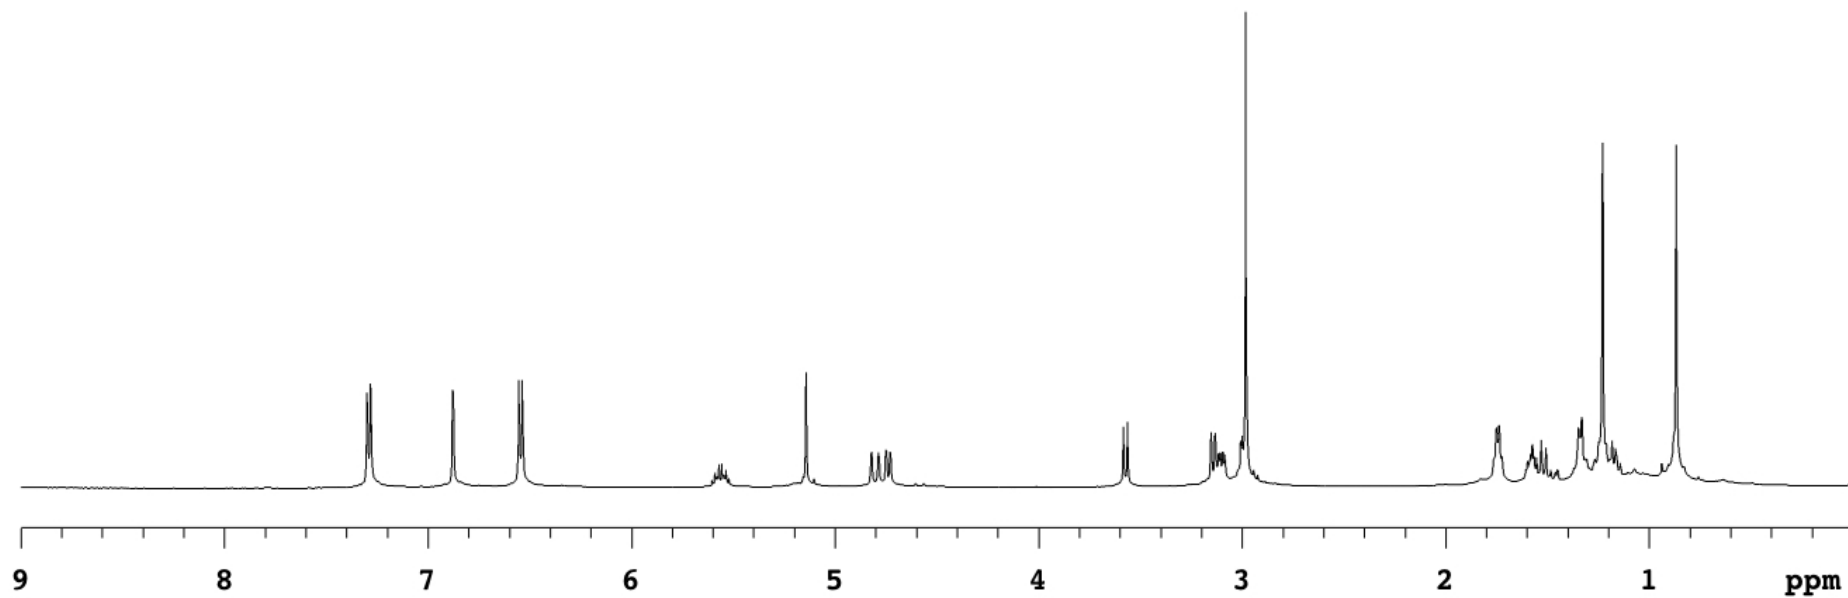



$^{13}\text{C}$  NMR, 125 MHz,  $\text{C}_6\text{D}_6$

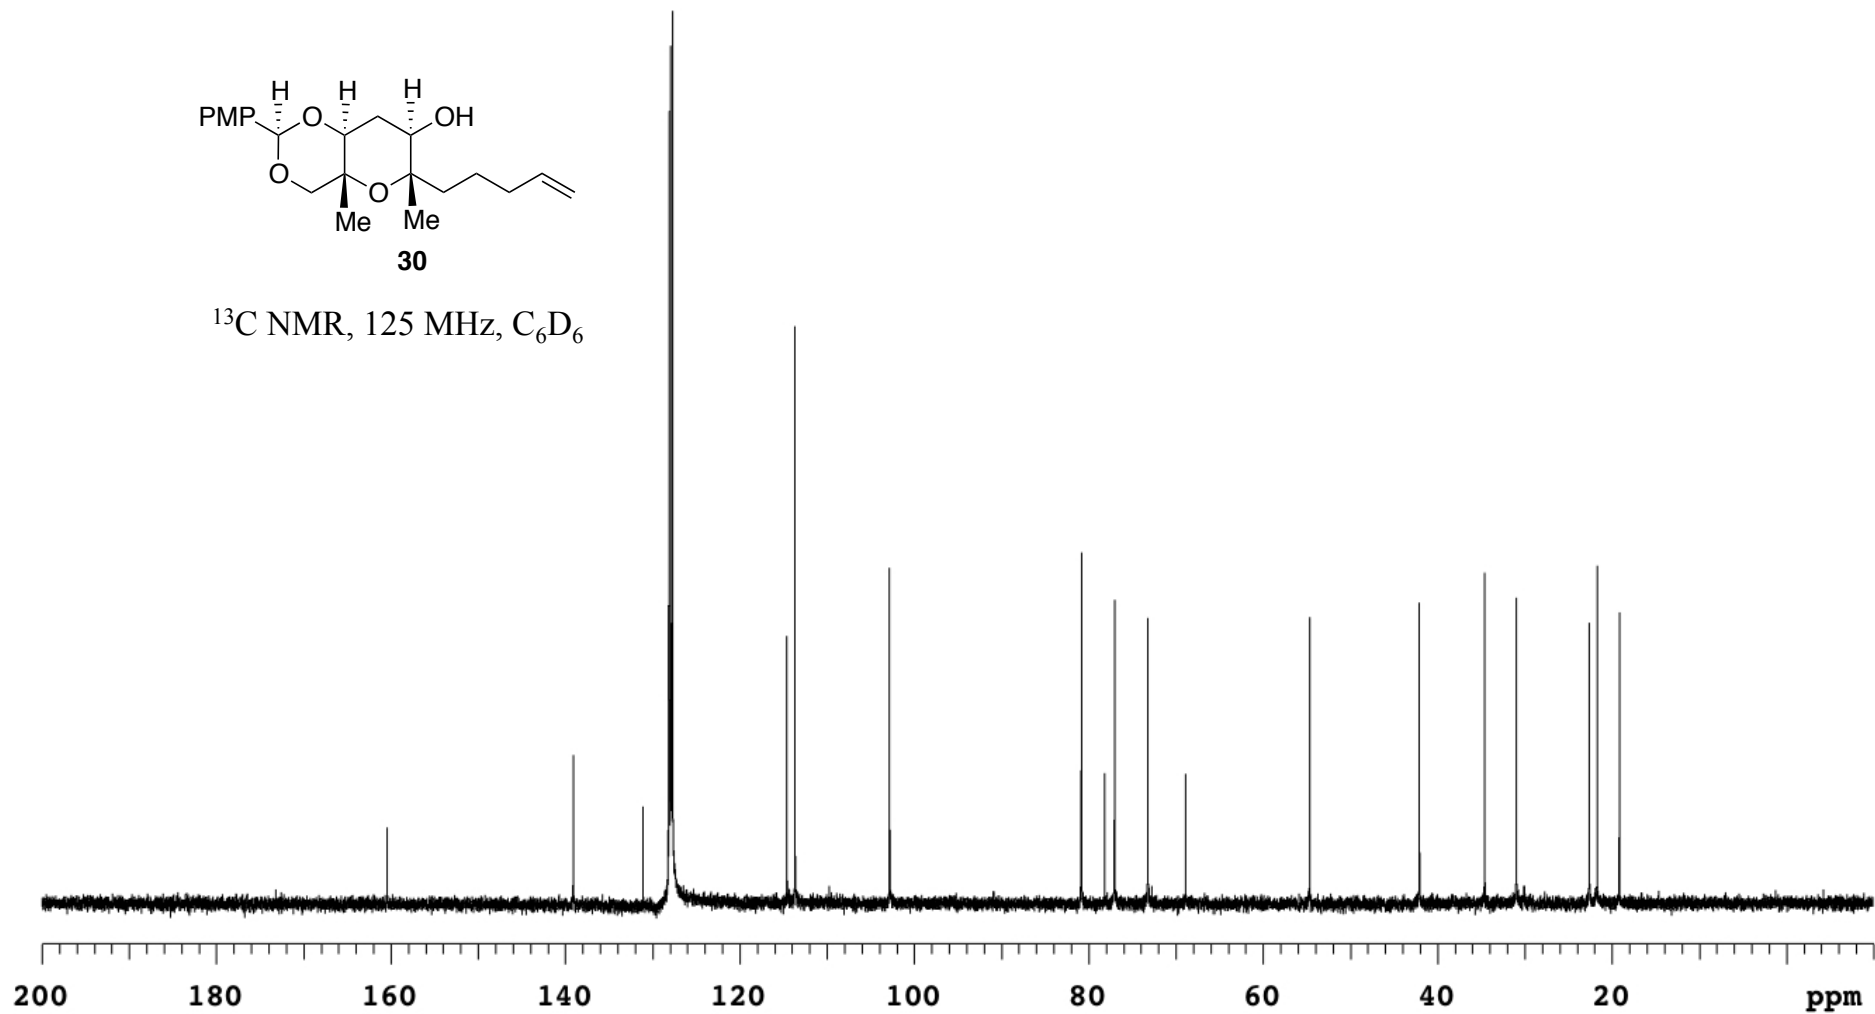



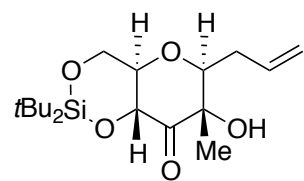

32

<sup>1</sup>H NMR, 500 MHz, CDCl<sub>3</sub>

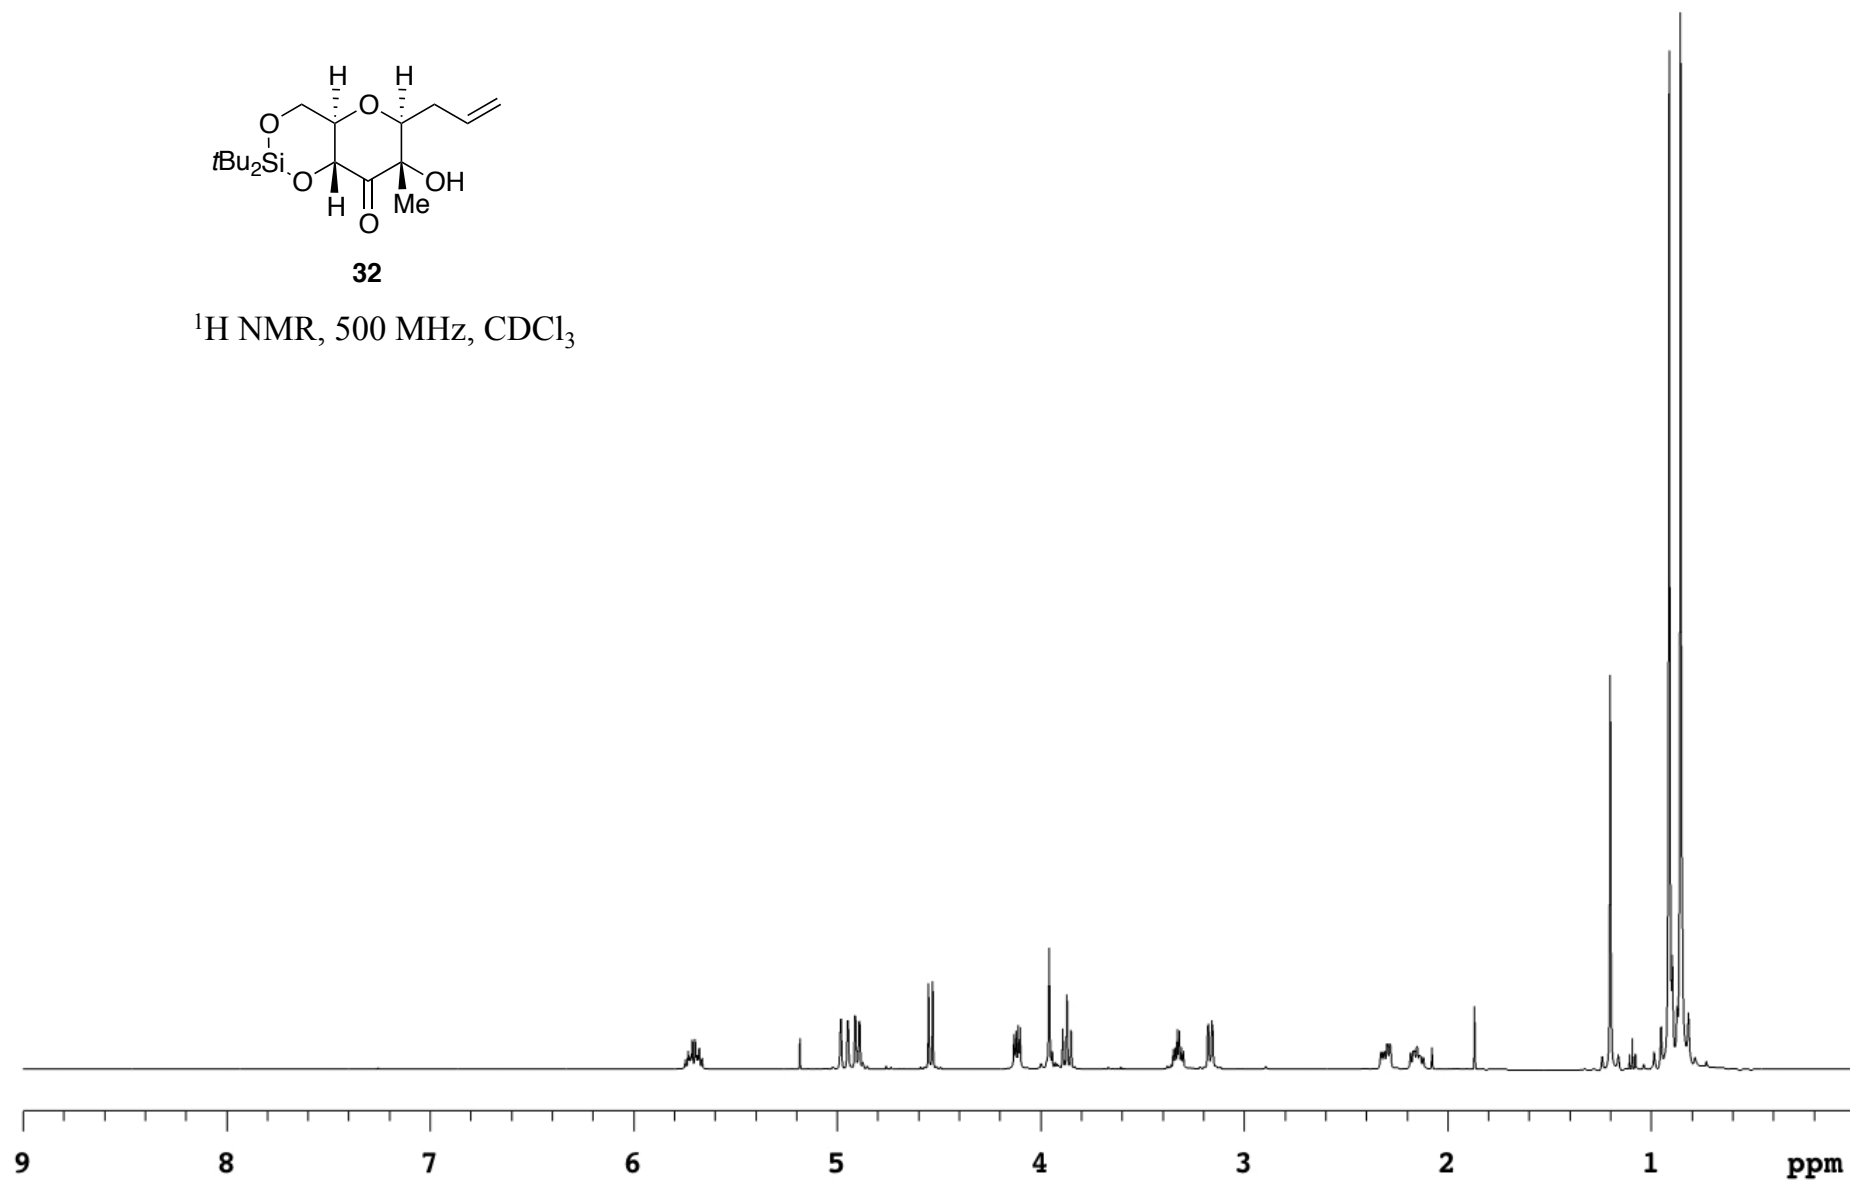

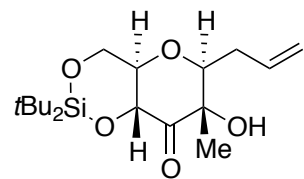

32

$^{13}\text{C}$  NMR, 125 MHz,  $\text{CDCl}_3$

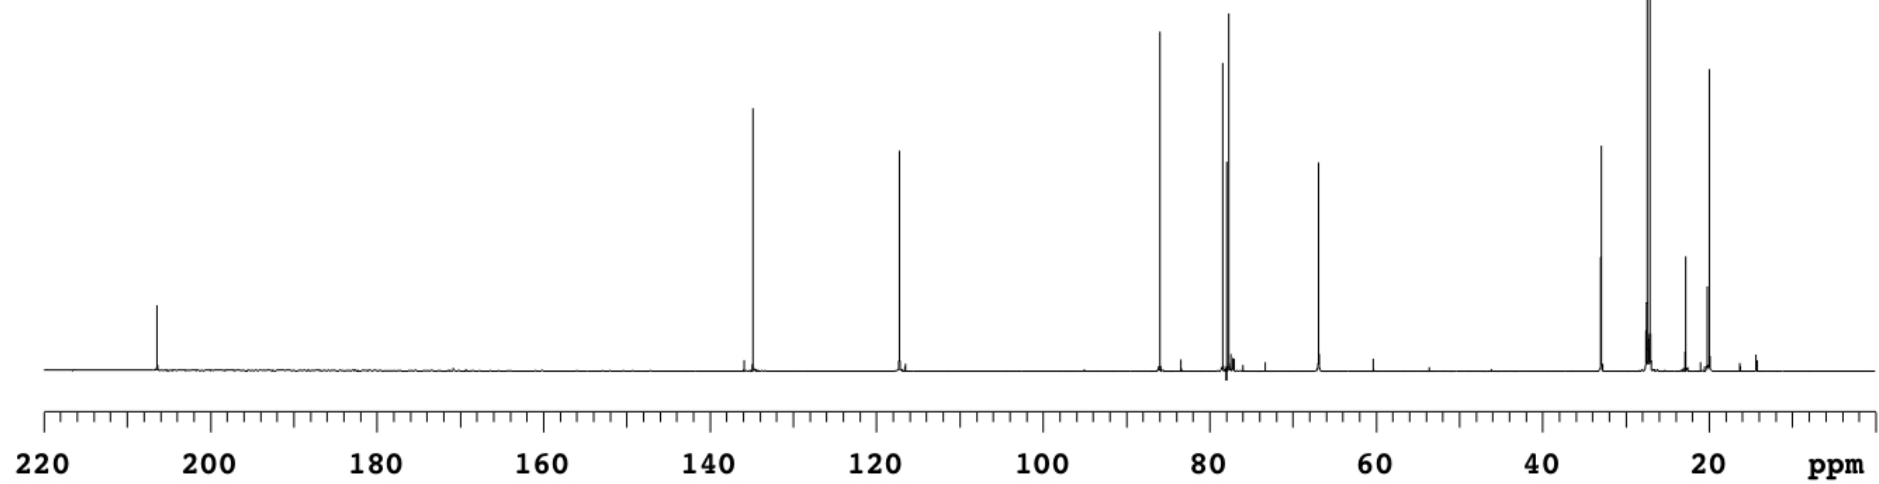

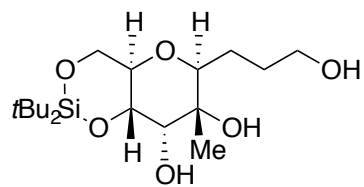

**34**

<sup>1</sup>H NMR, 500 MHz, CDCl<sub>3</sub>

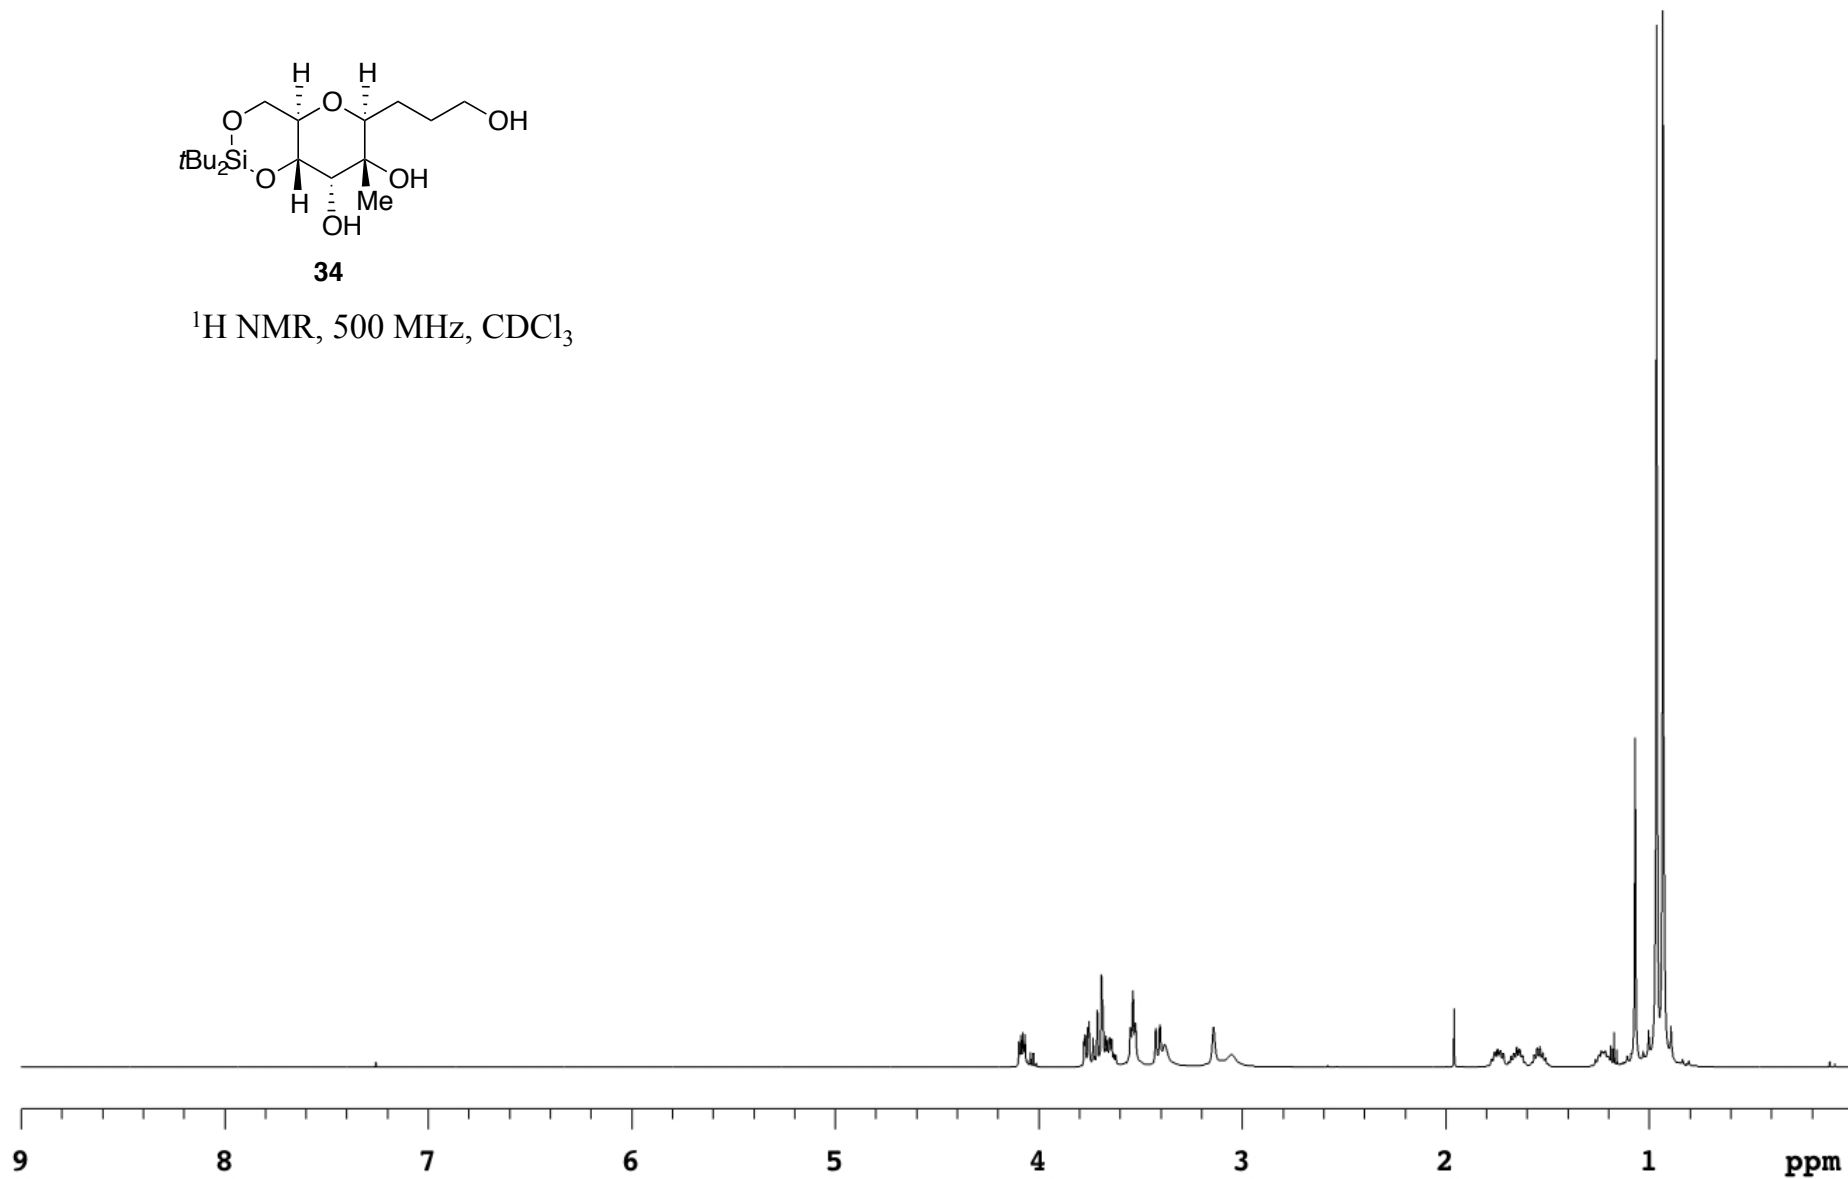



**34**

<sup>13</sup>C NMR, 125 MHz, CDCl<sub>3</sub>

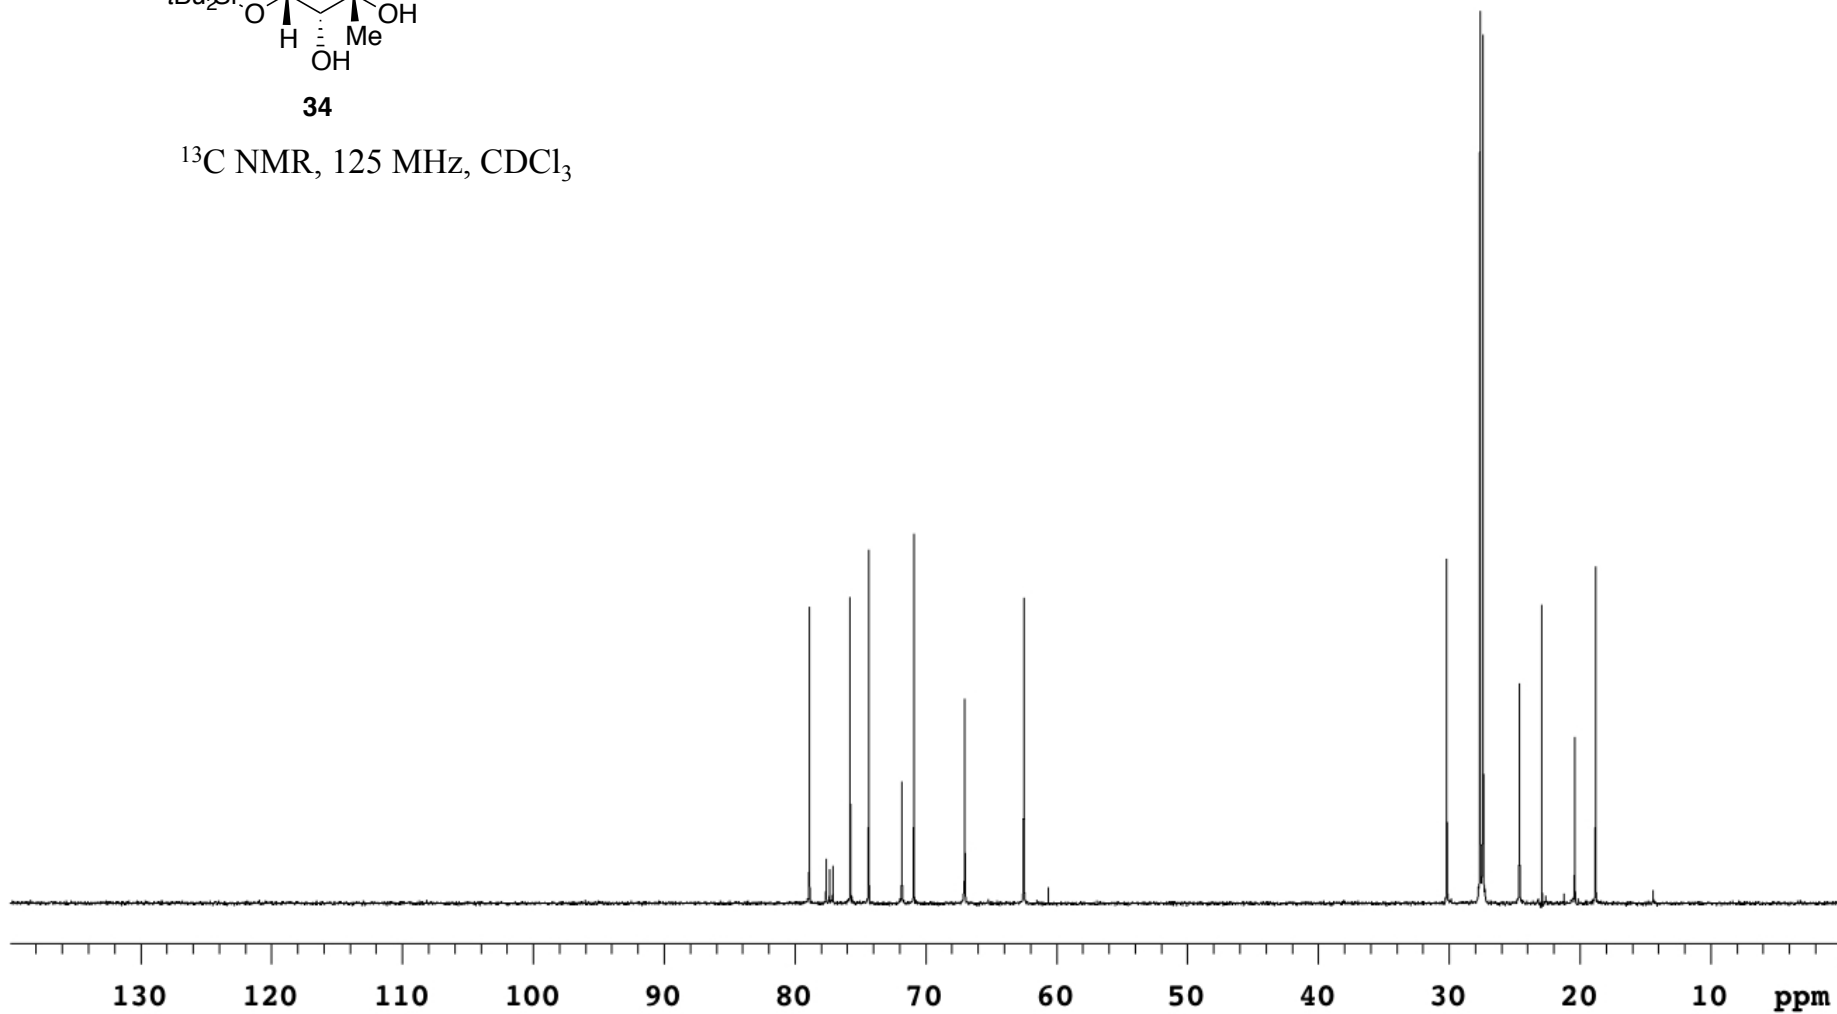

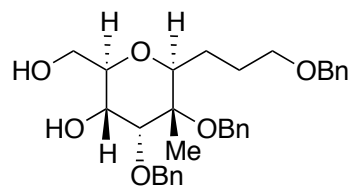

35

$^1\text{H NMR}$ , 500 MHz,  $\text{CDCl}_3$

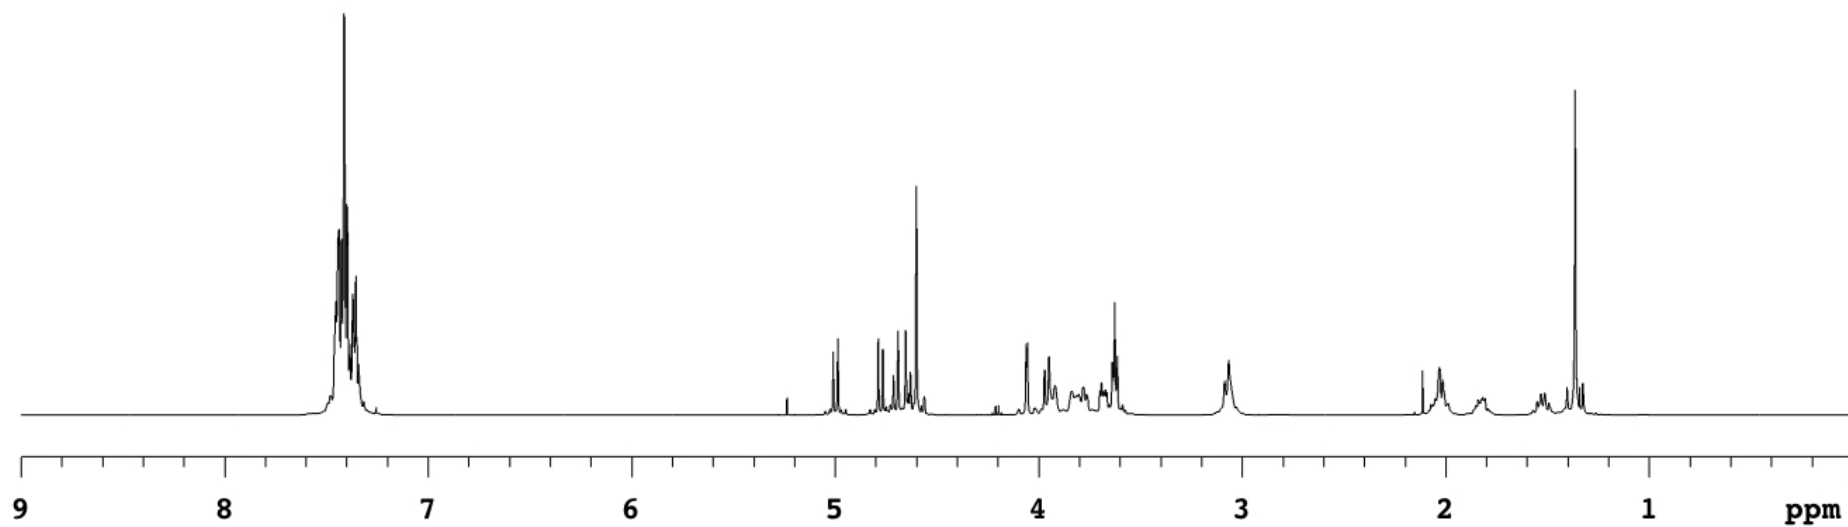



35

$^{13}\text{C}$  NMR, 125 MHz,  $\text{CDCl}_3$

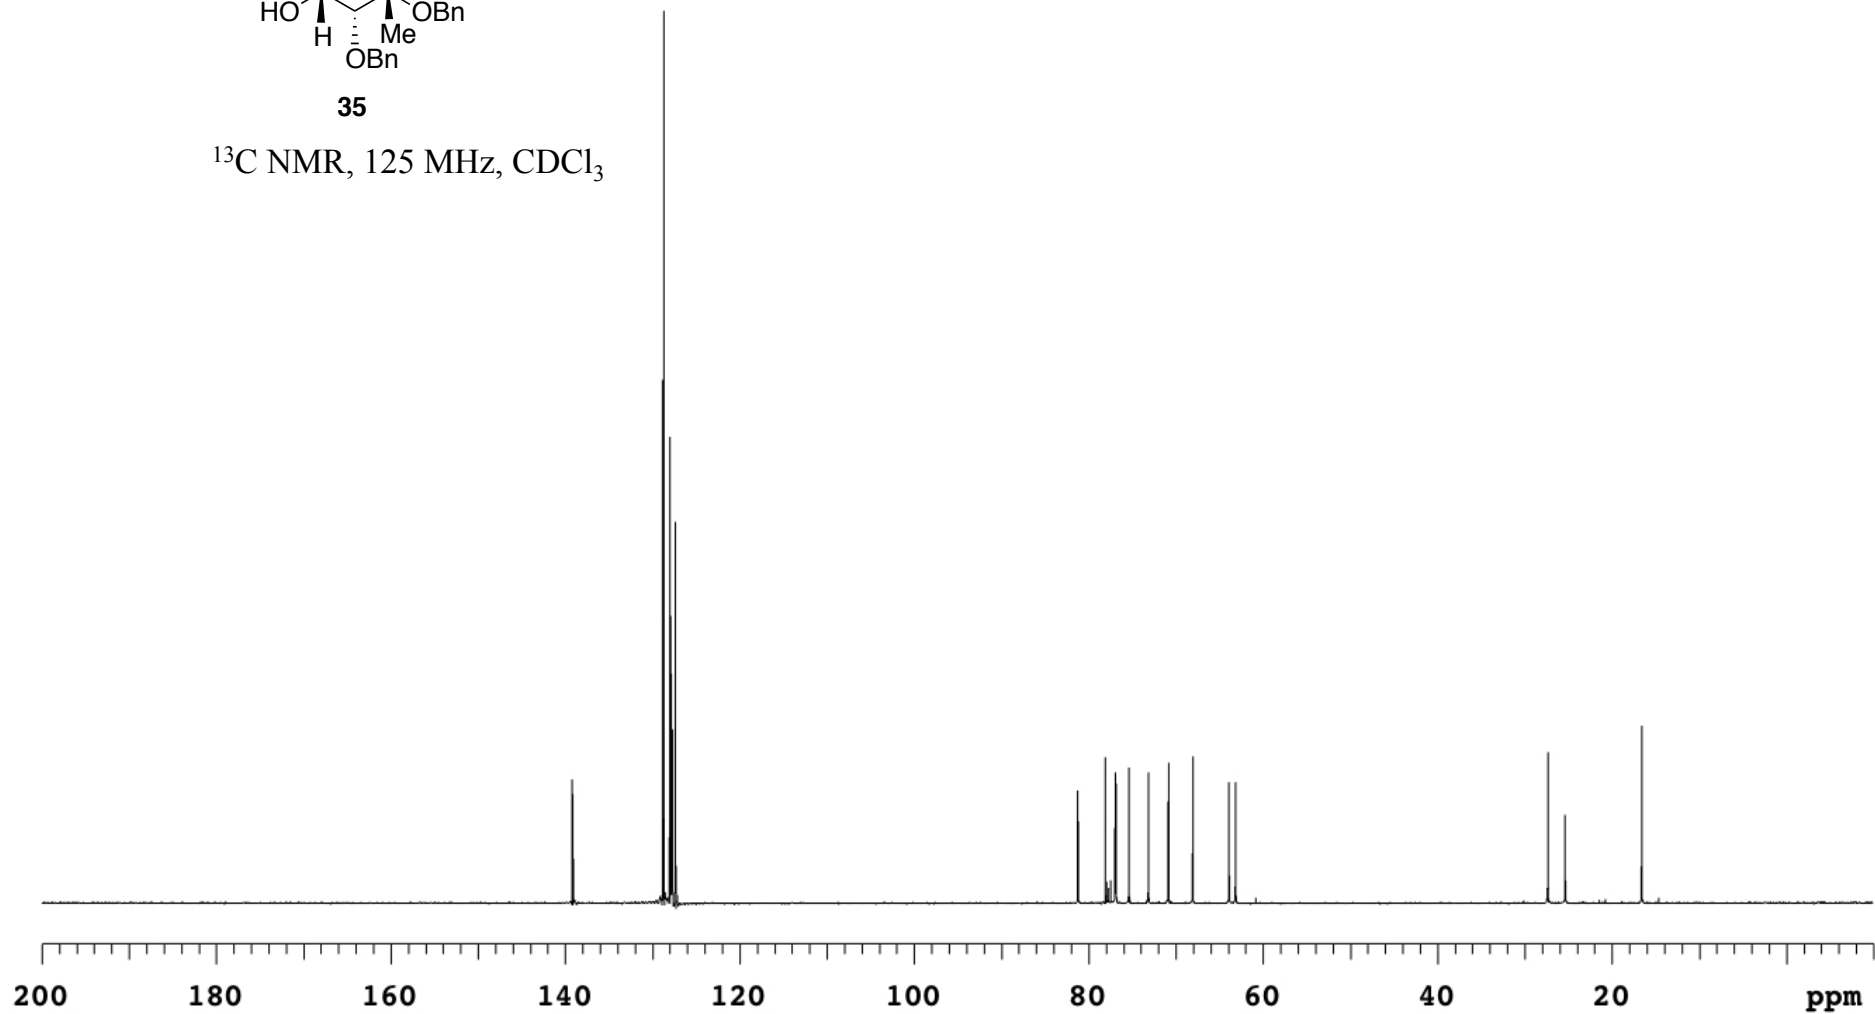

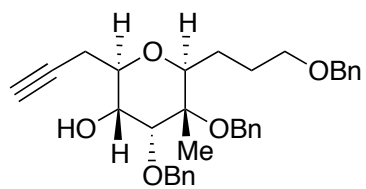

**37**

<sup>1</sup>H NMR, 500 MHz, CDCl<sub>3</sub>

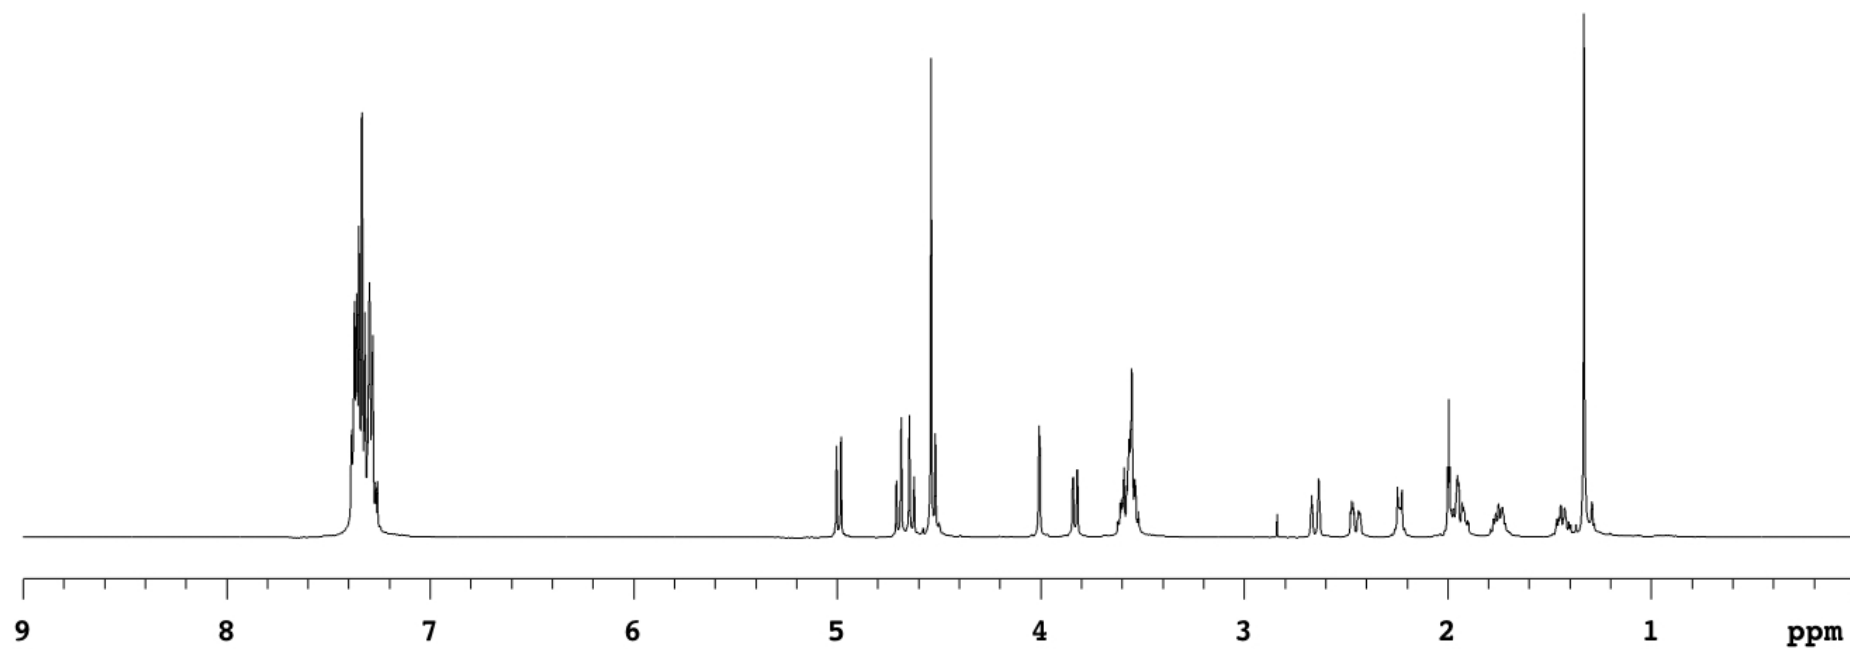

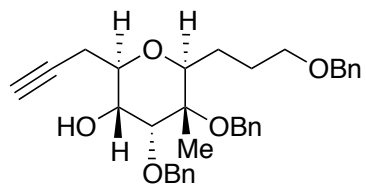

37

<sup>13</sup>C NMR, 125 MHz, CDCl<sub>3</sub>

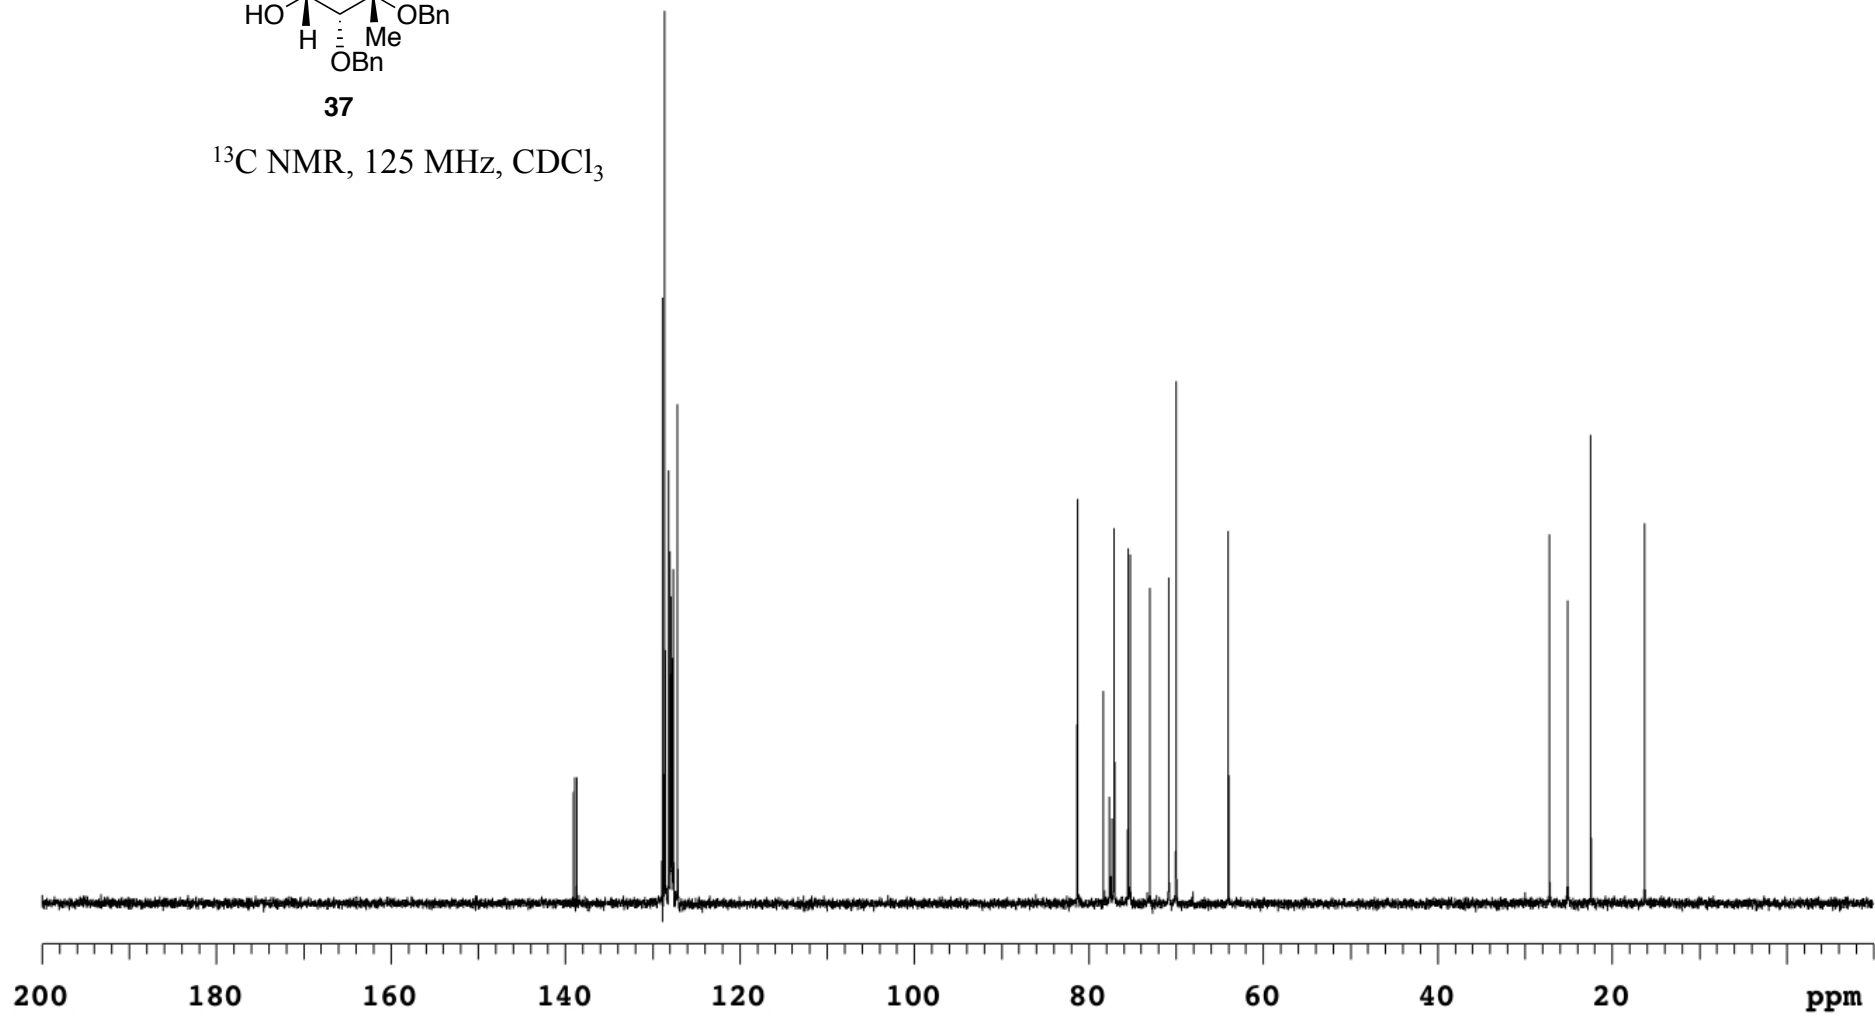



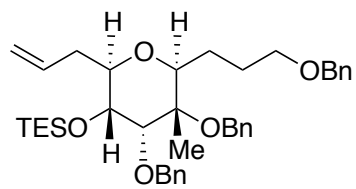

**38**

$^1\text{H}$  NMR, 500 MHz,  $\text{C}_6\text{D}_6$

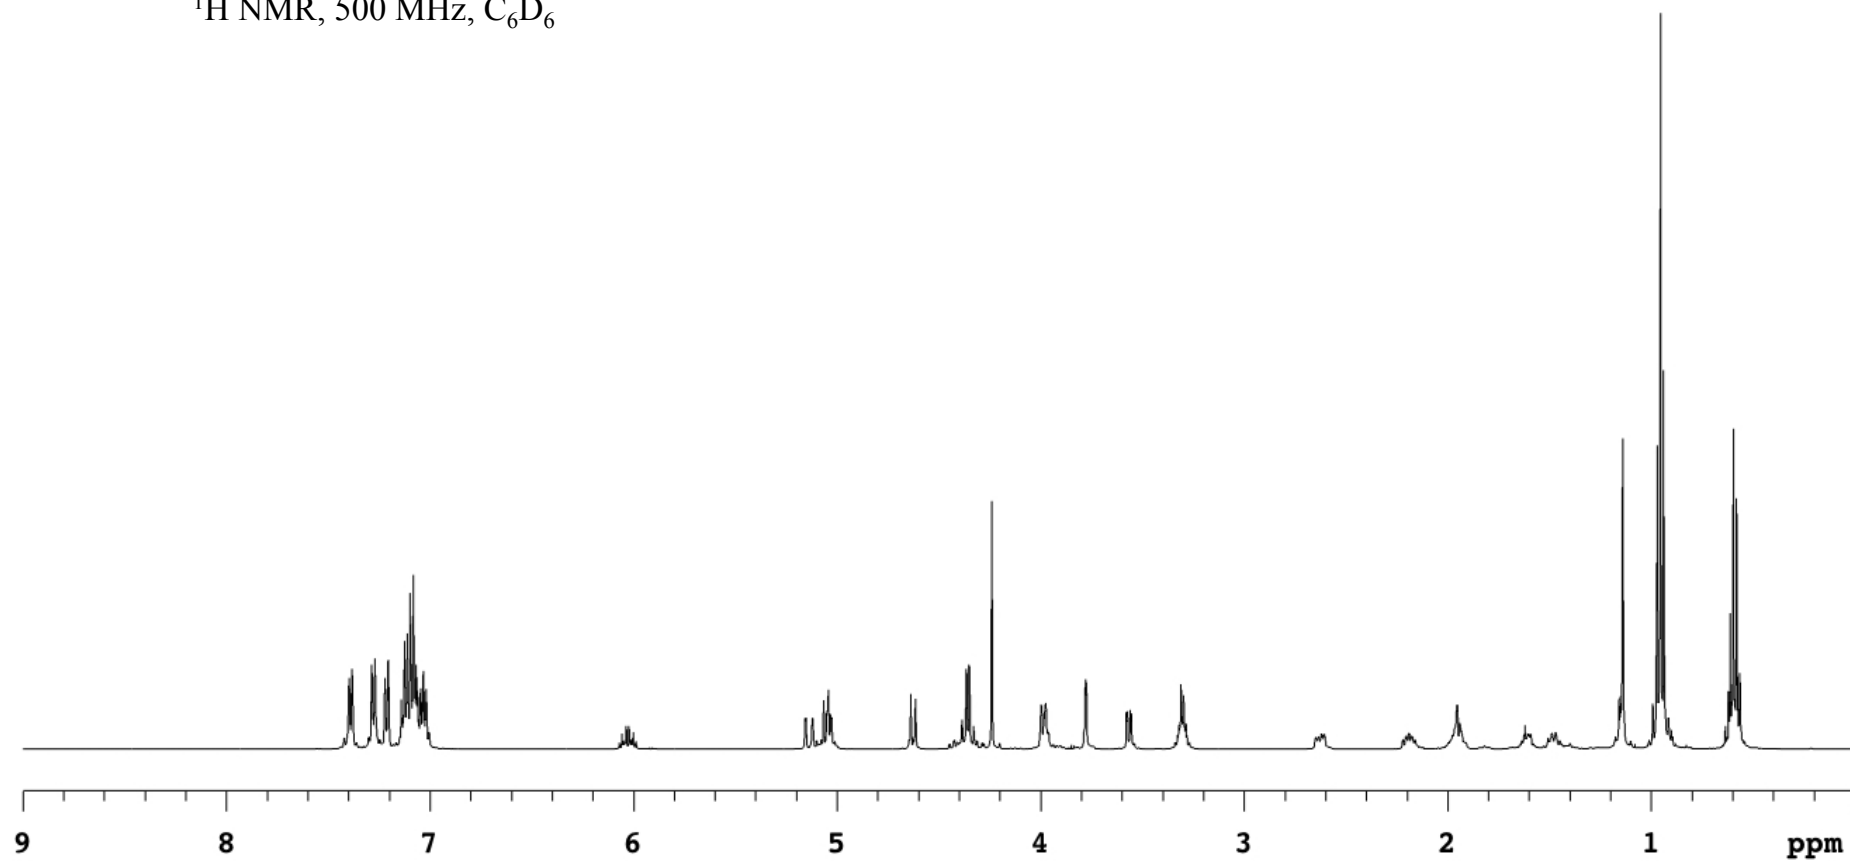

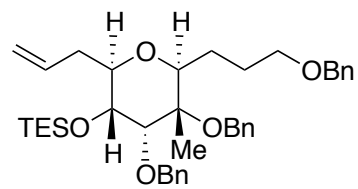

**38**

$^{13}\text{C}$  NMR, 125 MHz,  $\text{C}_6\text{D}_6$

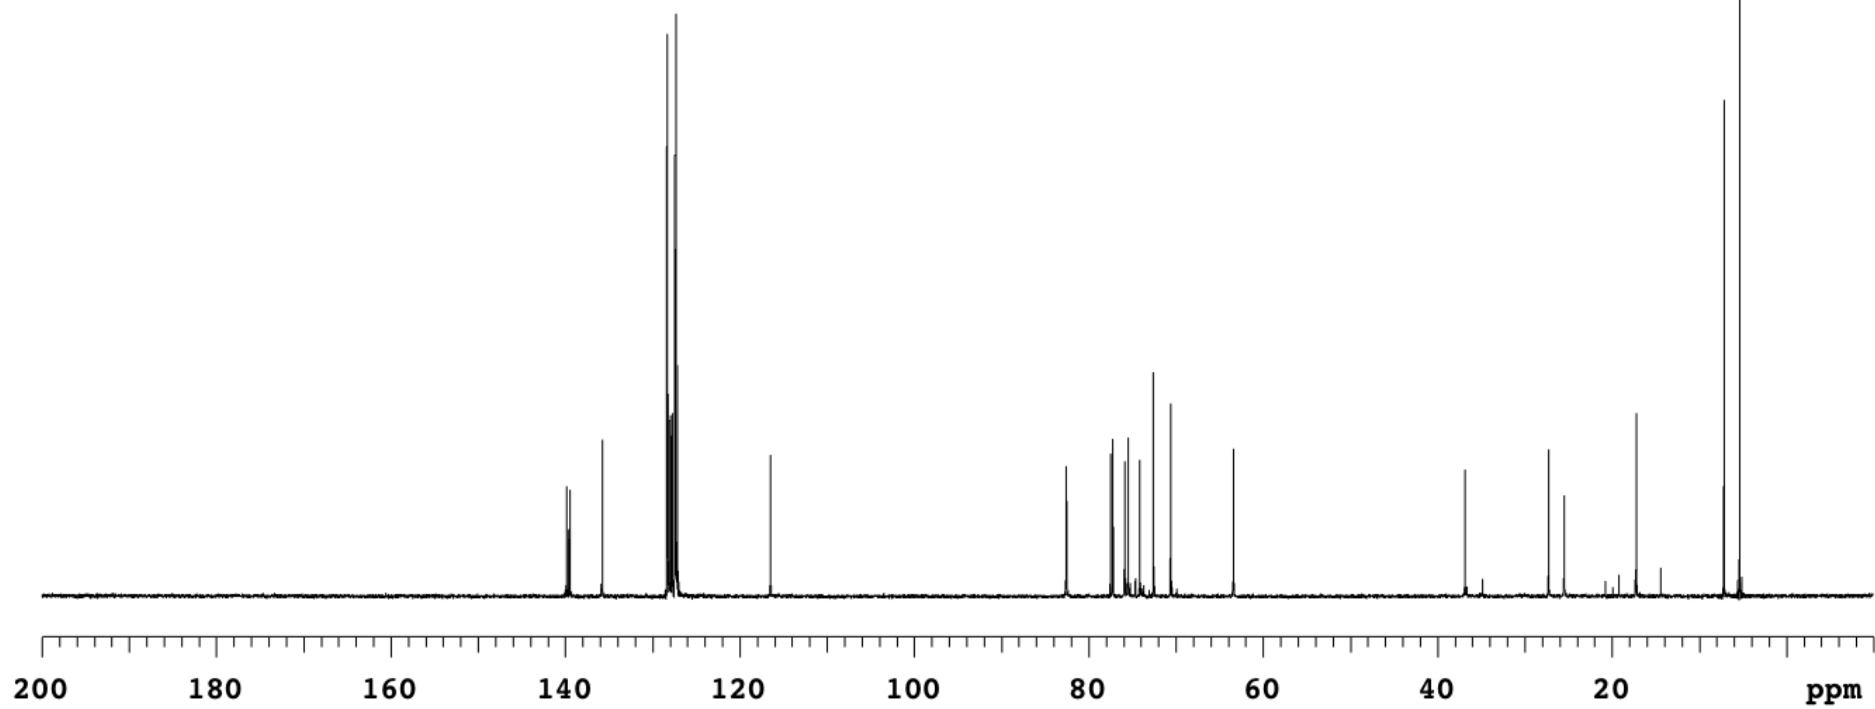

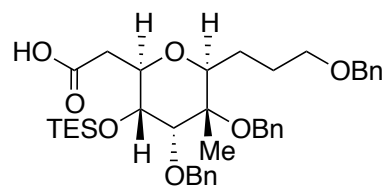

**39**

$^1\text{H}$  NMR, 500 MHz,  $\text{C}_6\text{D}_6$

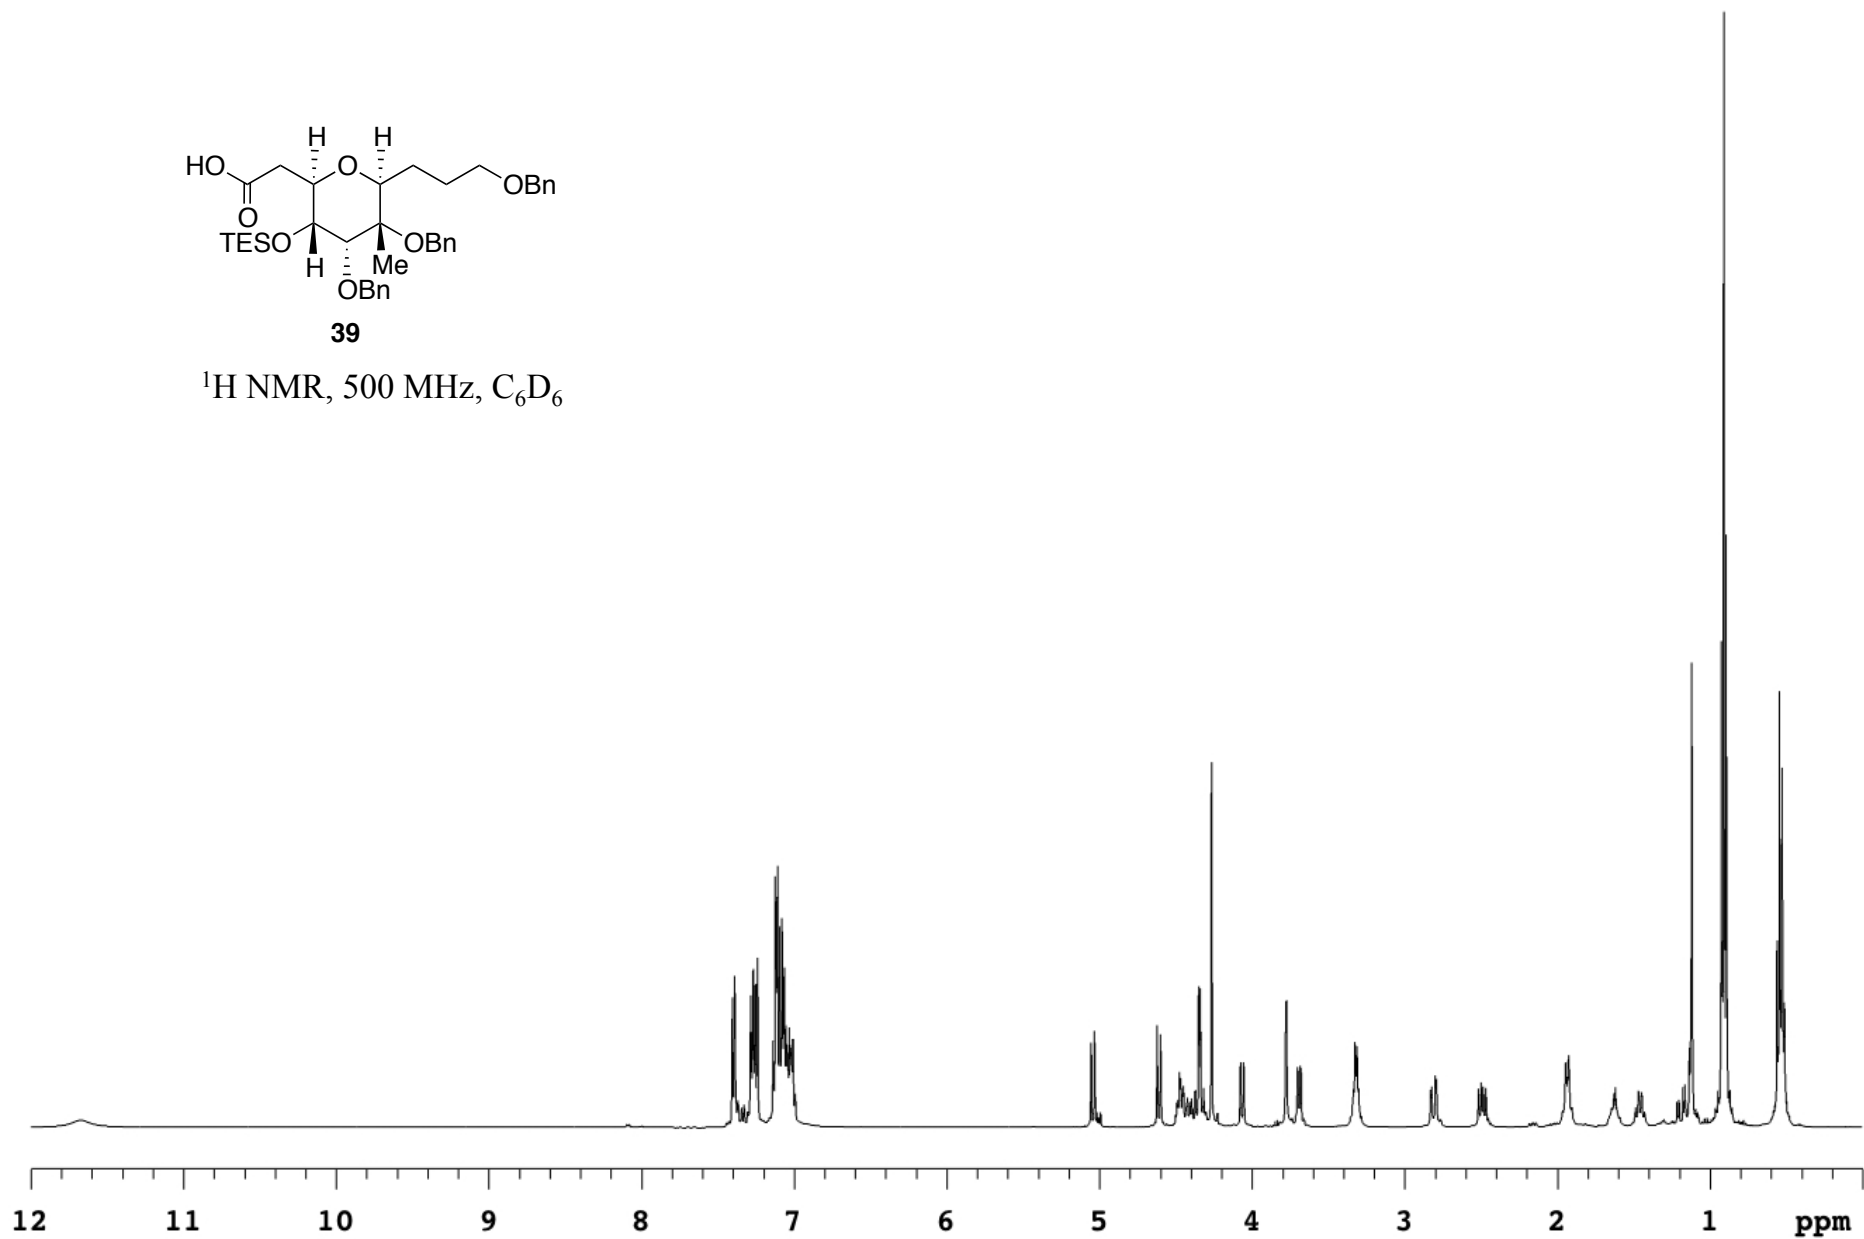



**39**

$^{13}\text{C}$  NMR, 125 MHz,  $\text{C}_6\text{D}_6$

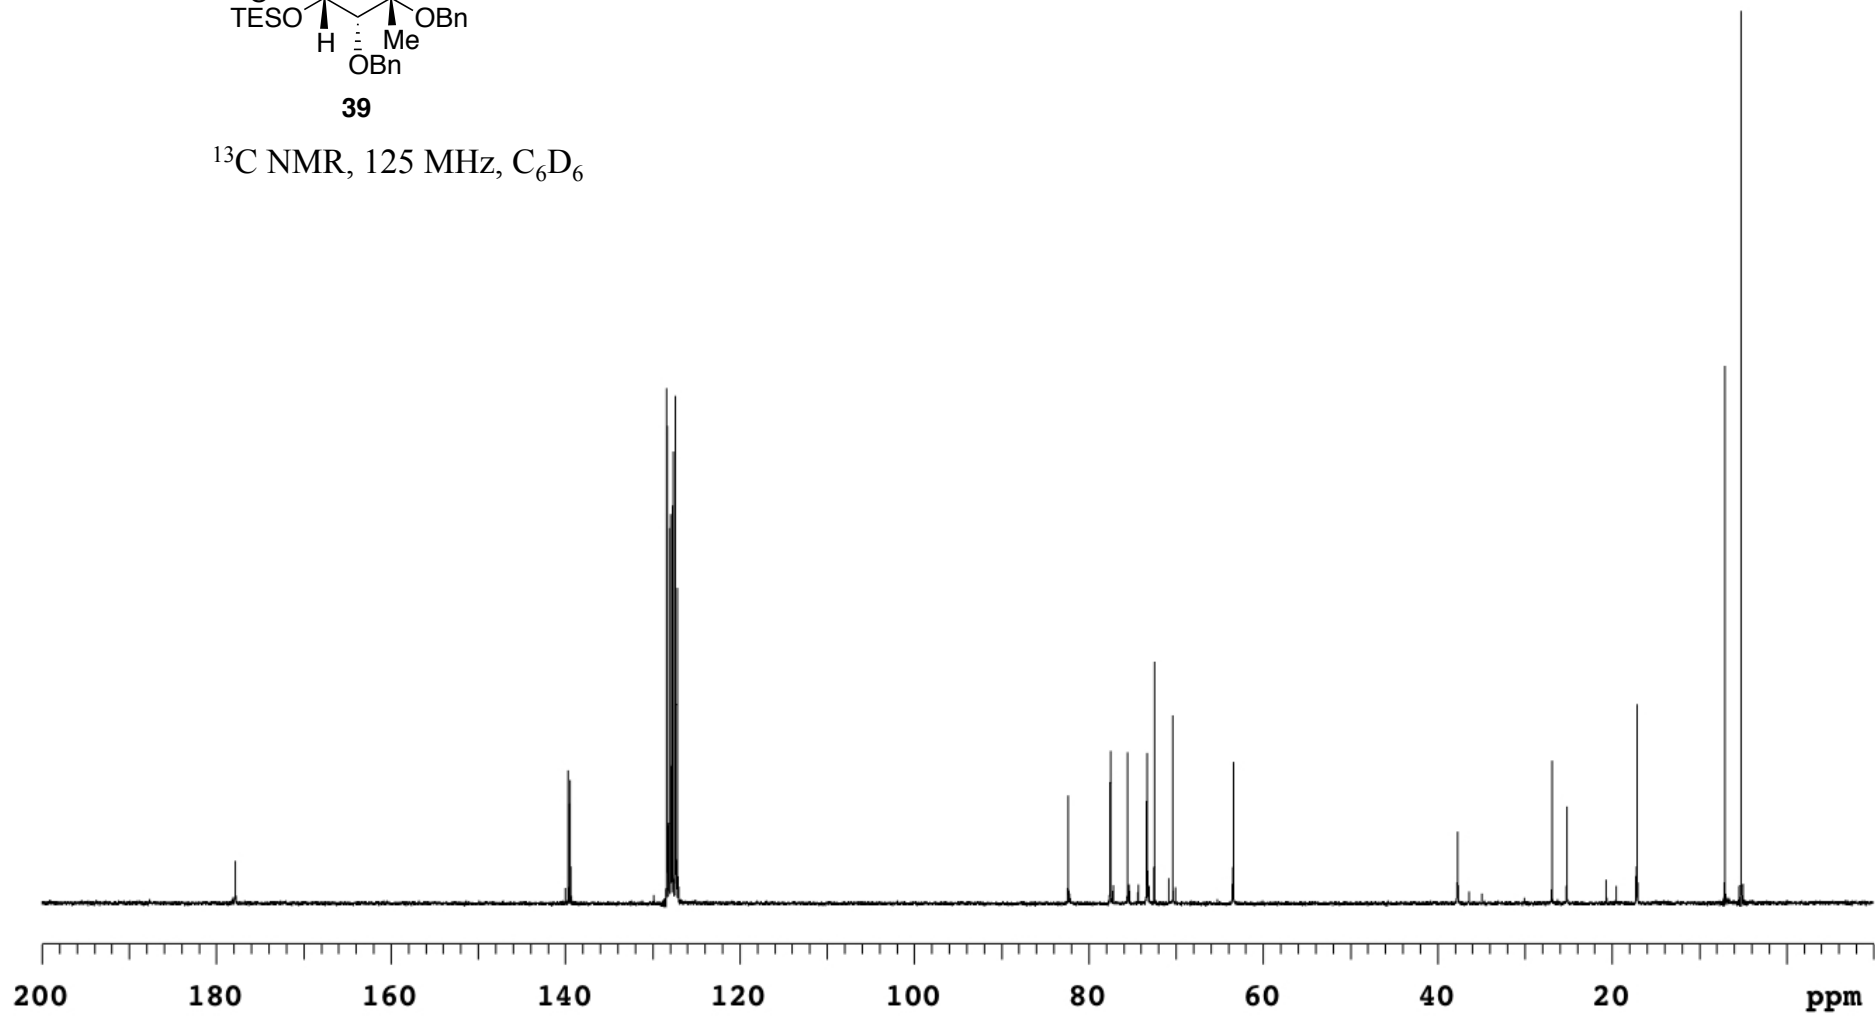

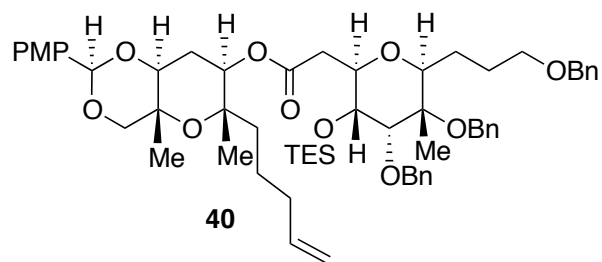

$^1\text{H}$  NMR, 500 MHz,  $\text{C}_6\text{D}_6$

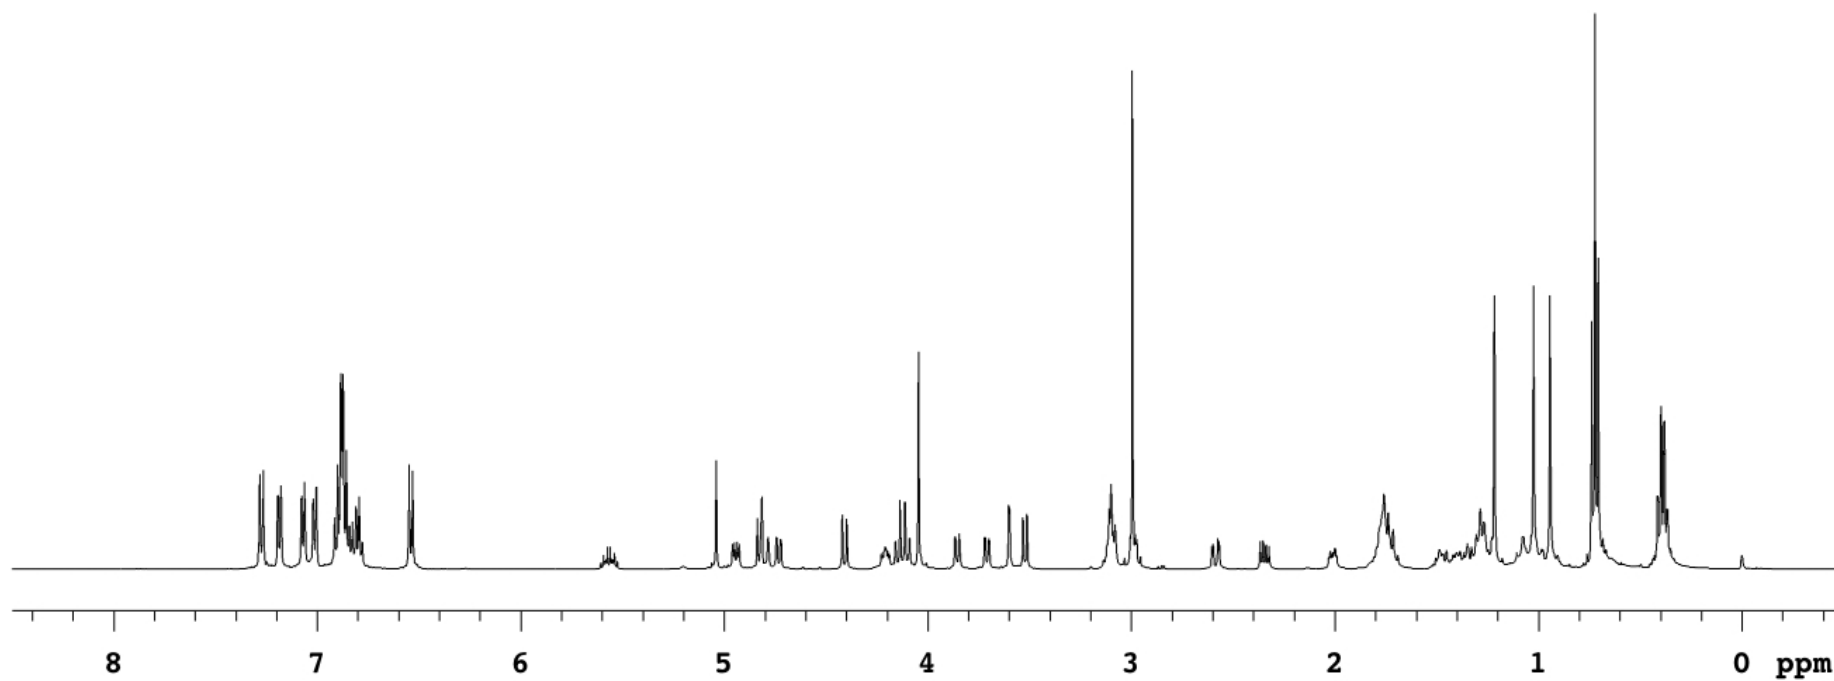

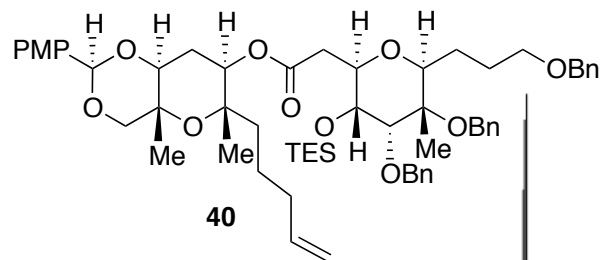

$^{13}\text{C}$  NMR, 125 MHz,  $\text{C}_6\text{D}_6$

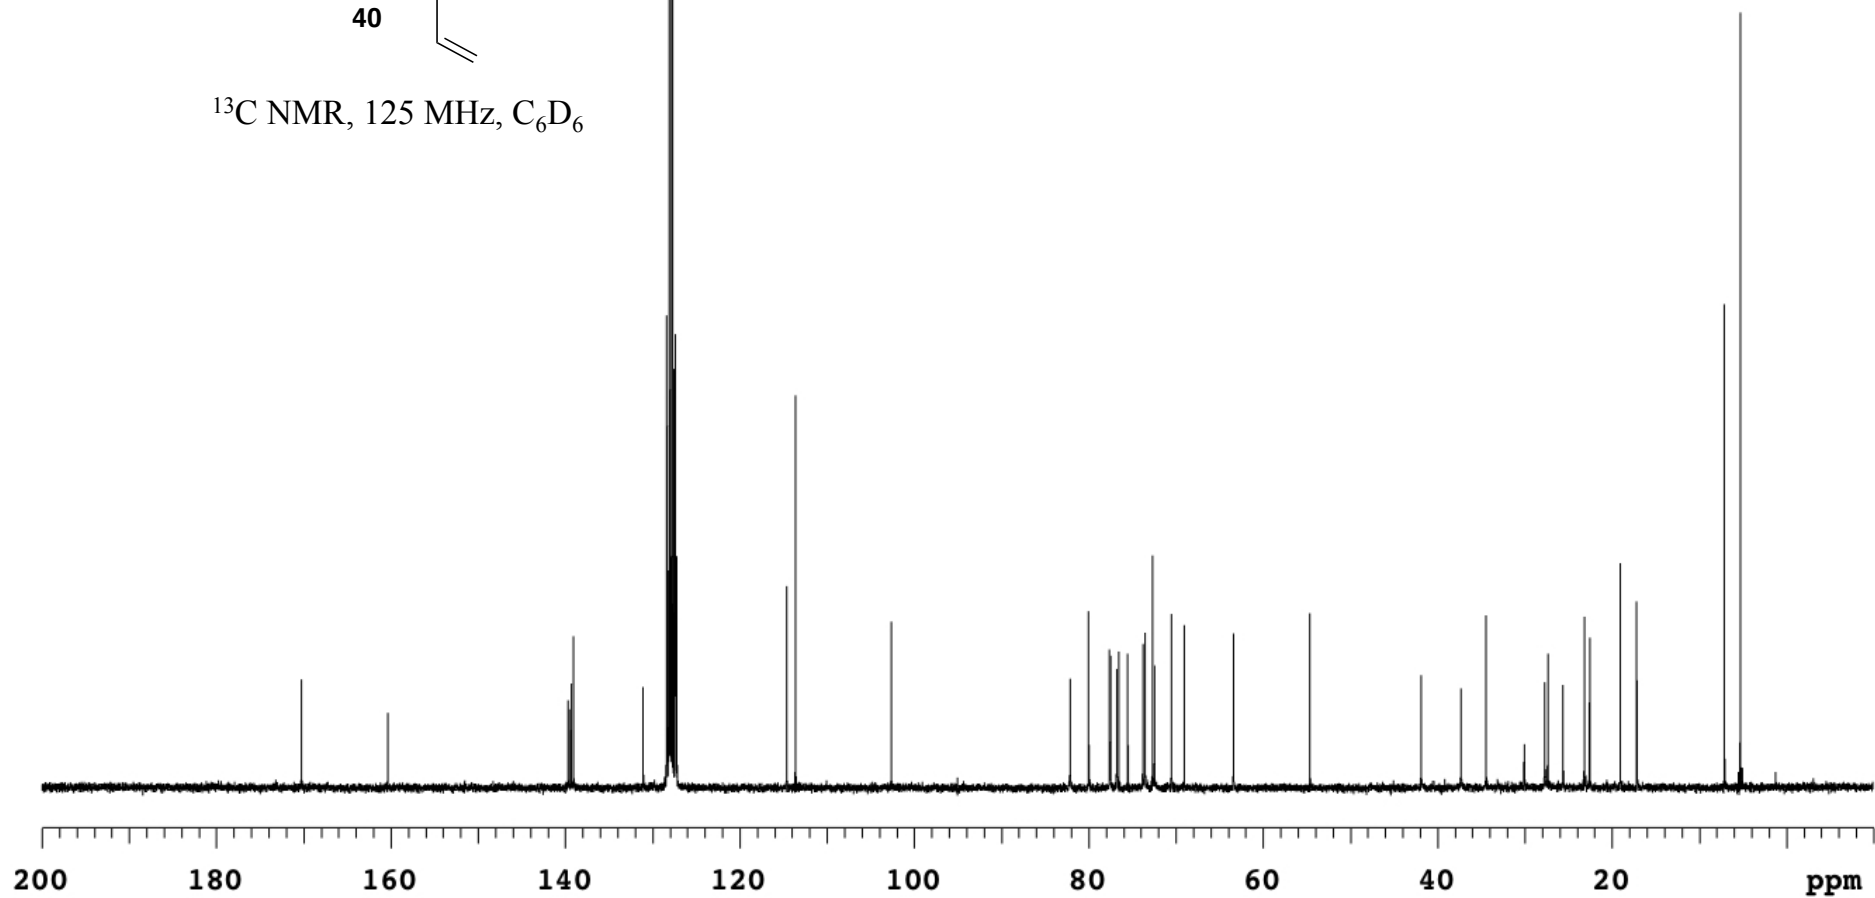

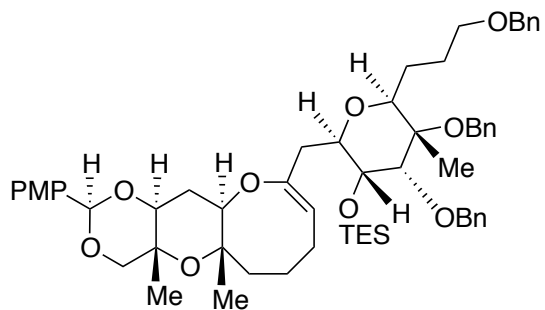

41

$^1\text{H}$  NMR, 500 MHz,  $\text{C}_6\text{D}_6$

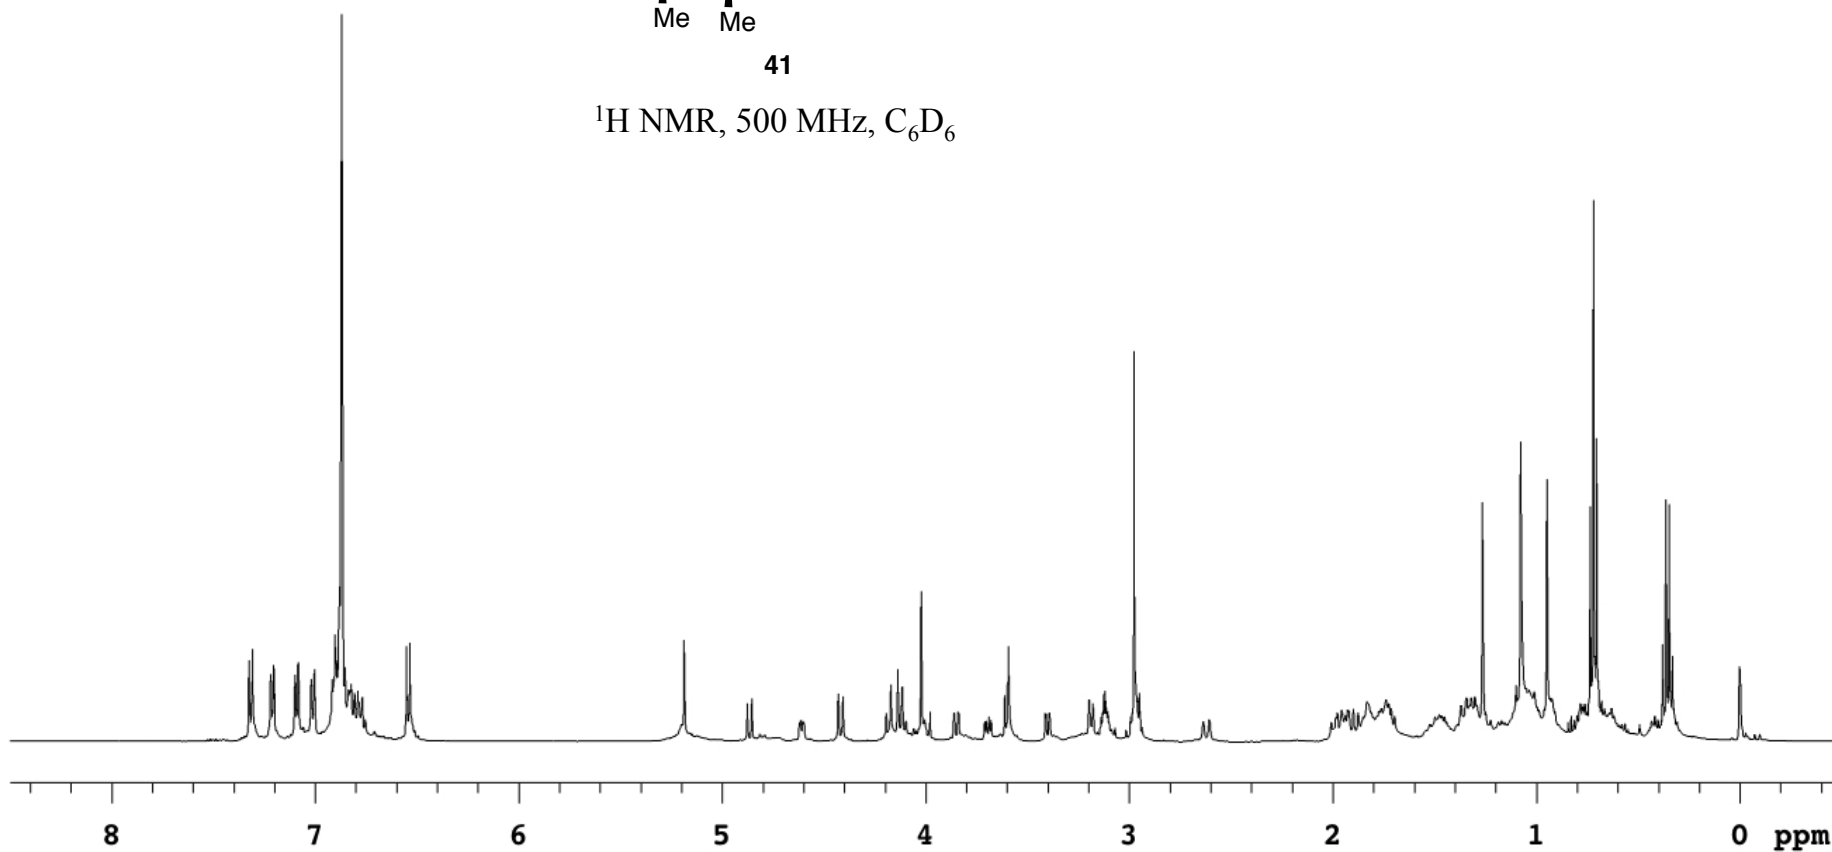

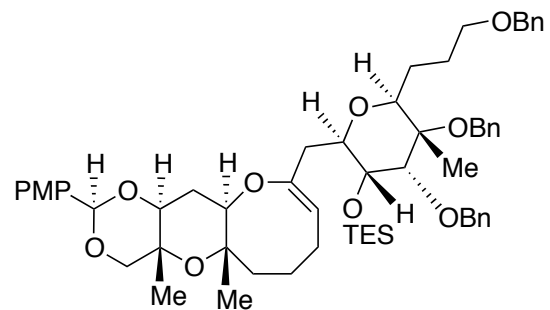

41

$^{13}\text{C}$  NMR, 100 MHz,  $\text{C}_6\text{D}_6$

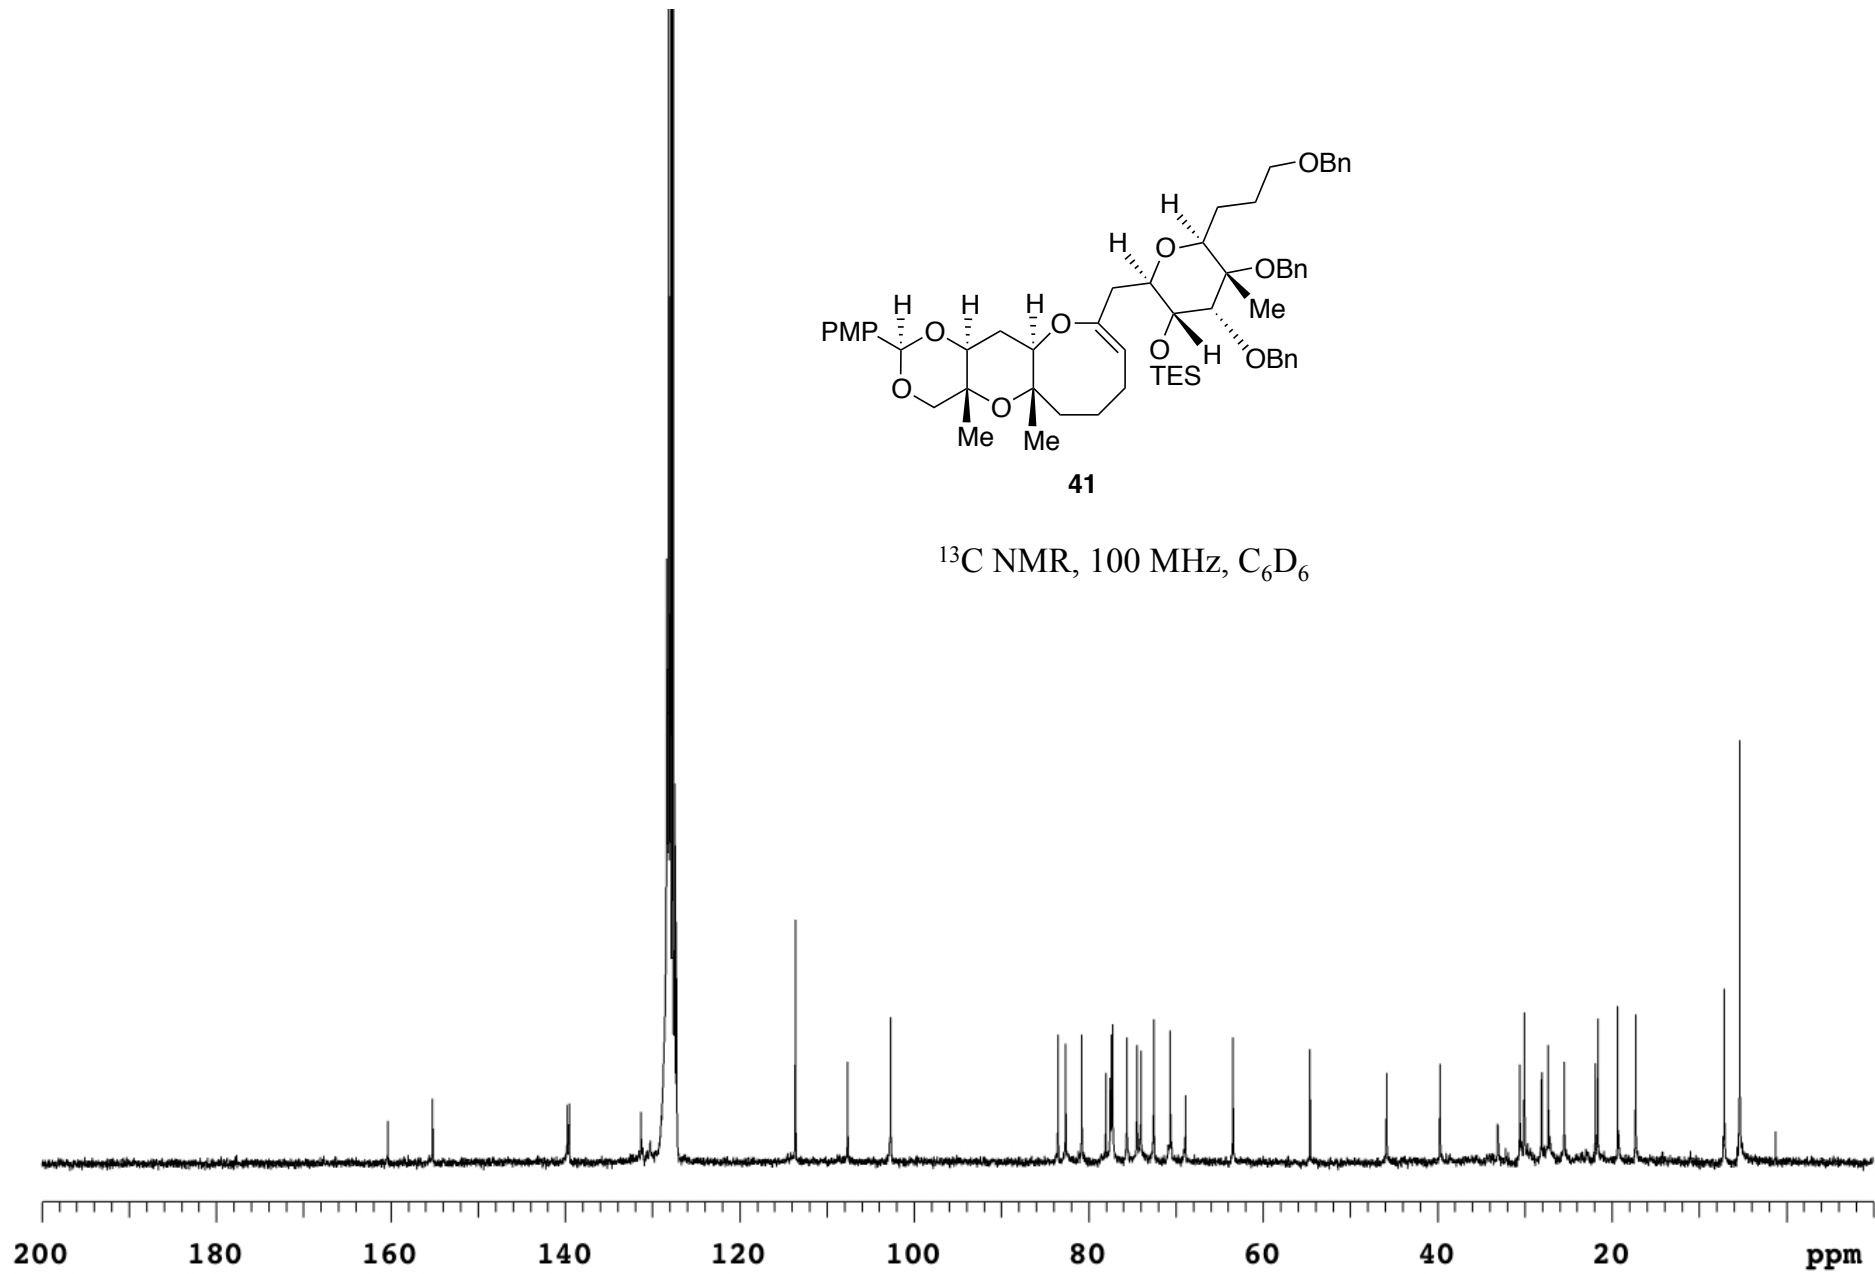



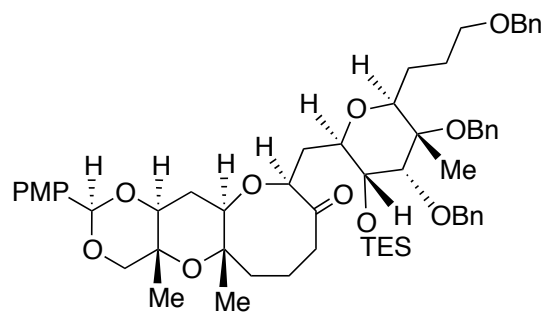

44

$^1\text{H}$  NMR, 500 MHz,  $\text{C}_6\text{D}_6$

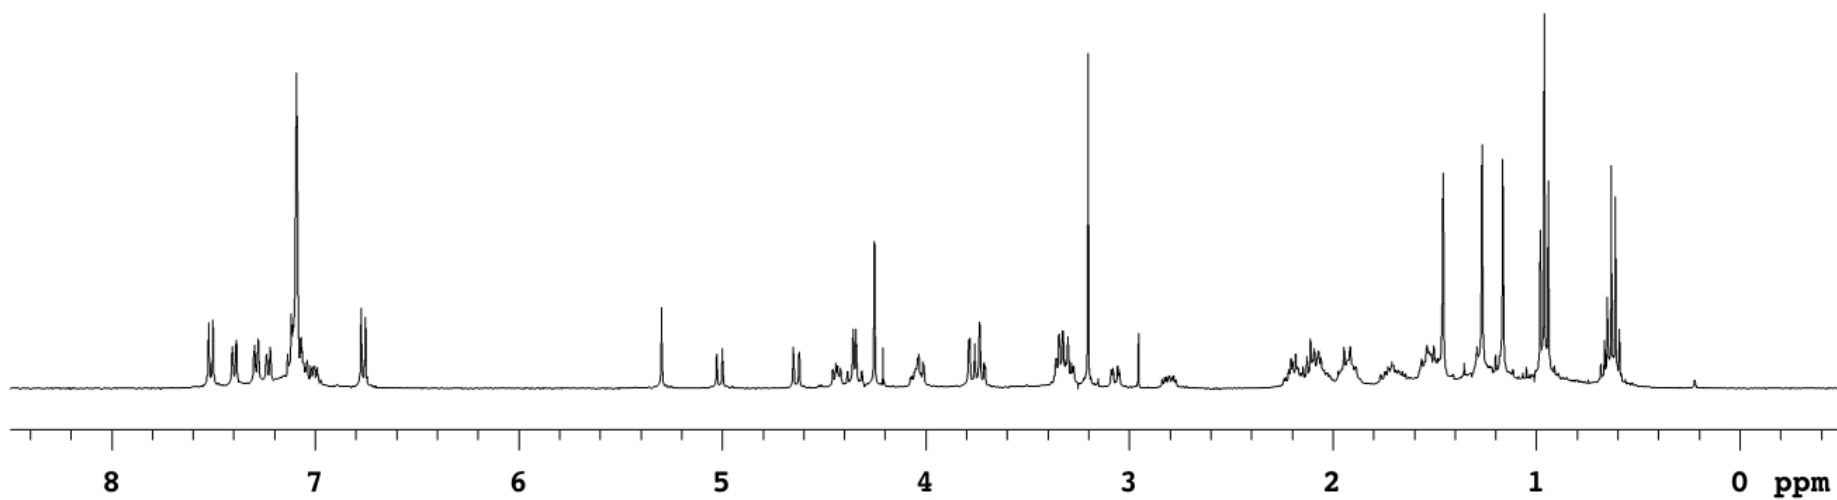

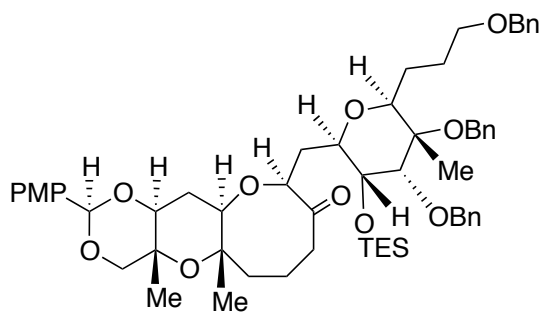

**44**

$^{13}\text{C}$  NMR, 100 MHz,  $\text{C}_6\text{D}_6$

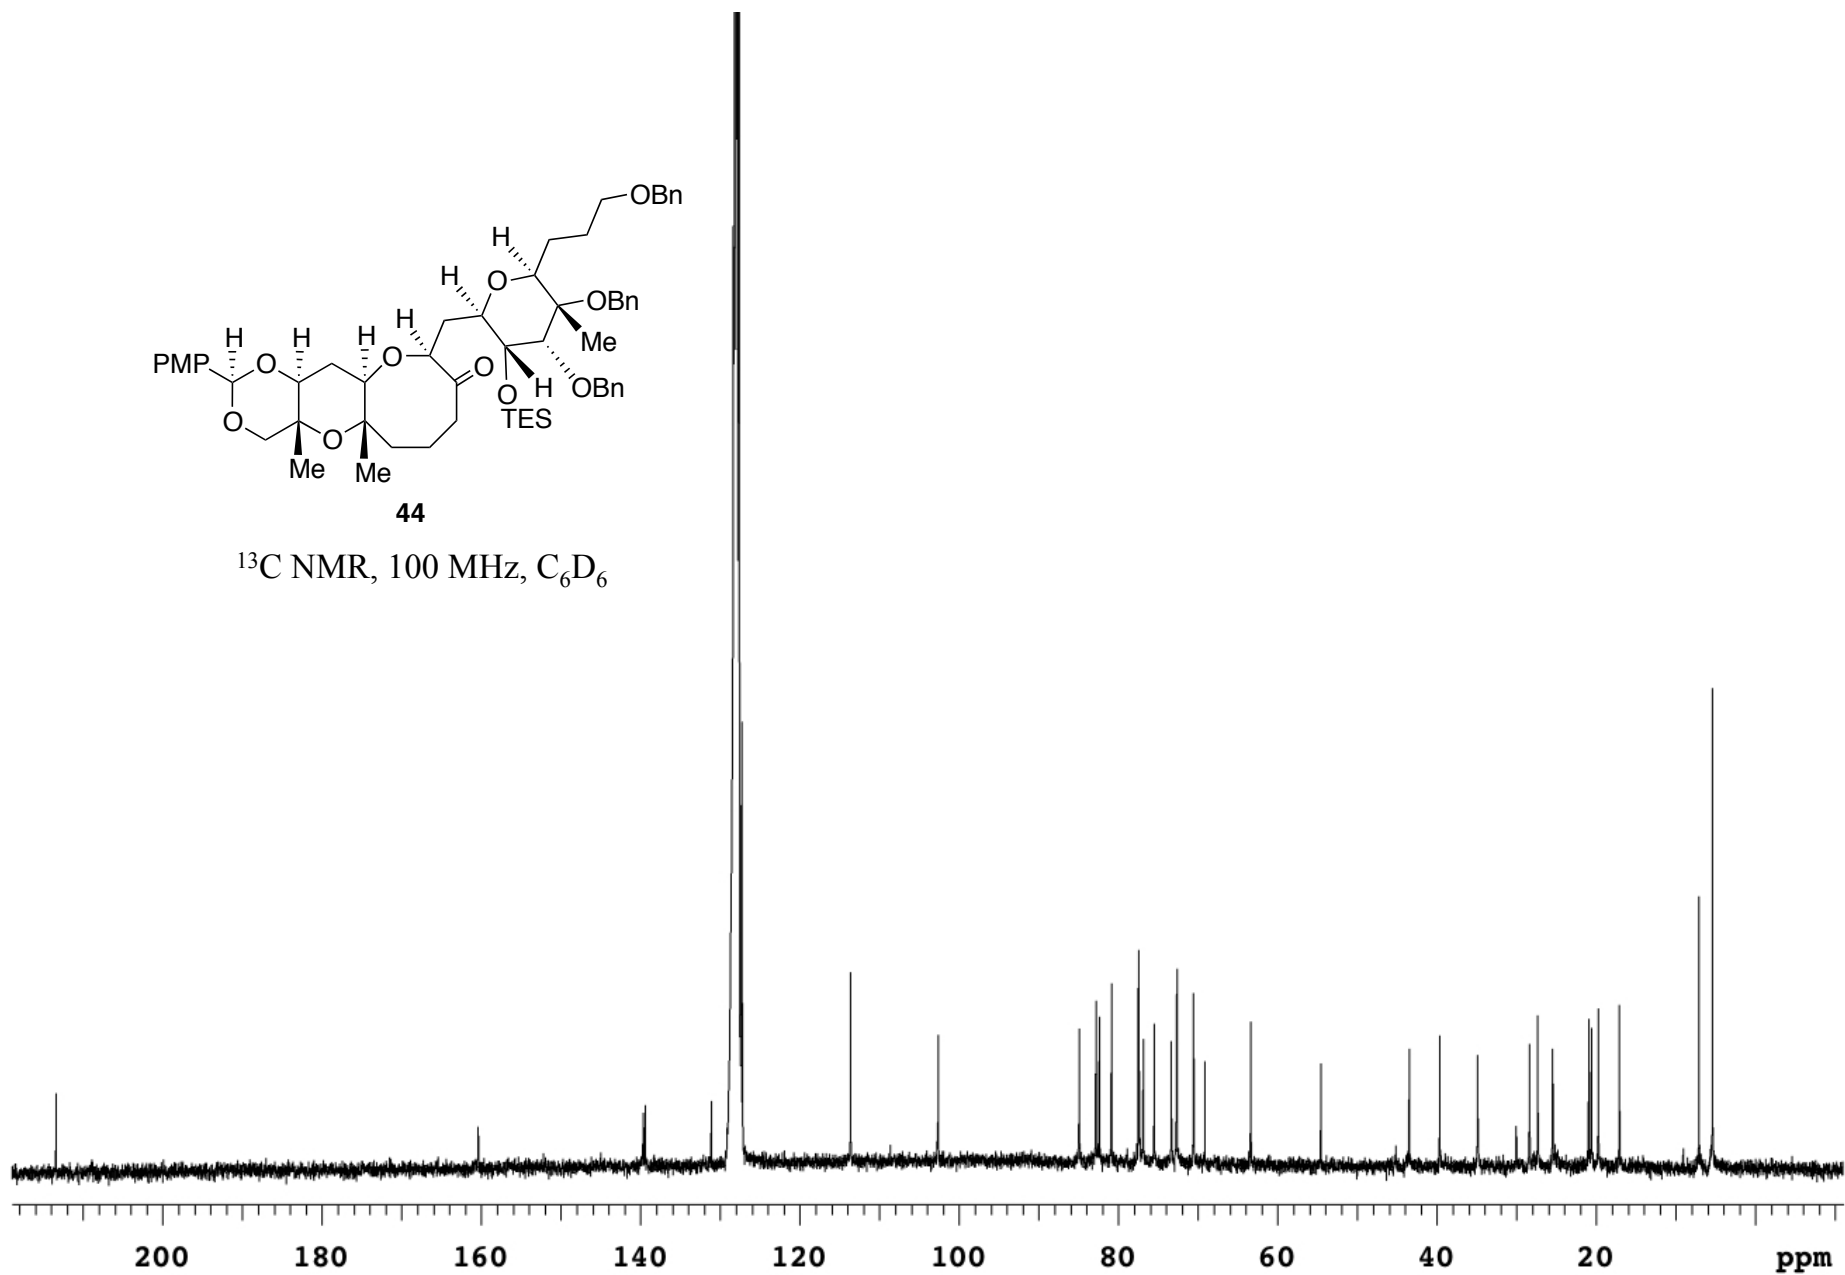



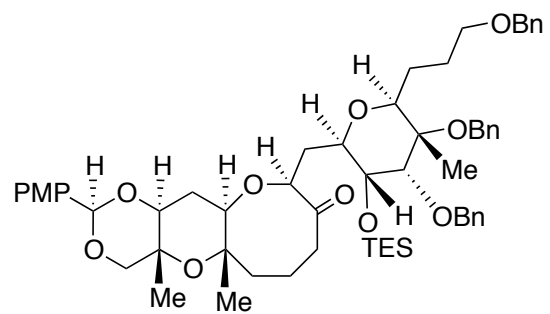

44

nOe1d, 500 MHz, C<sub>6</sub>D<sub>6</sub>

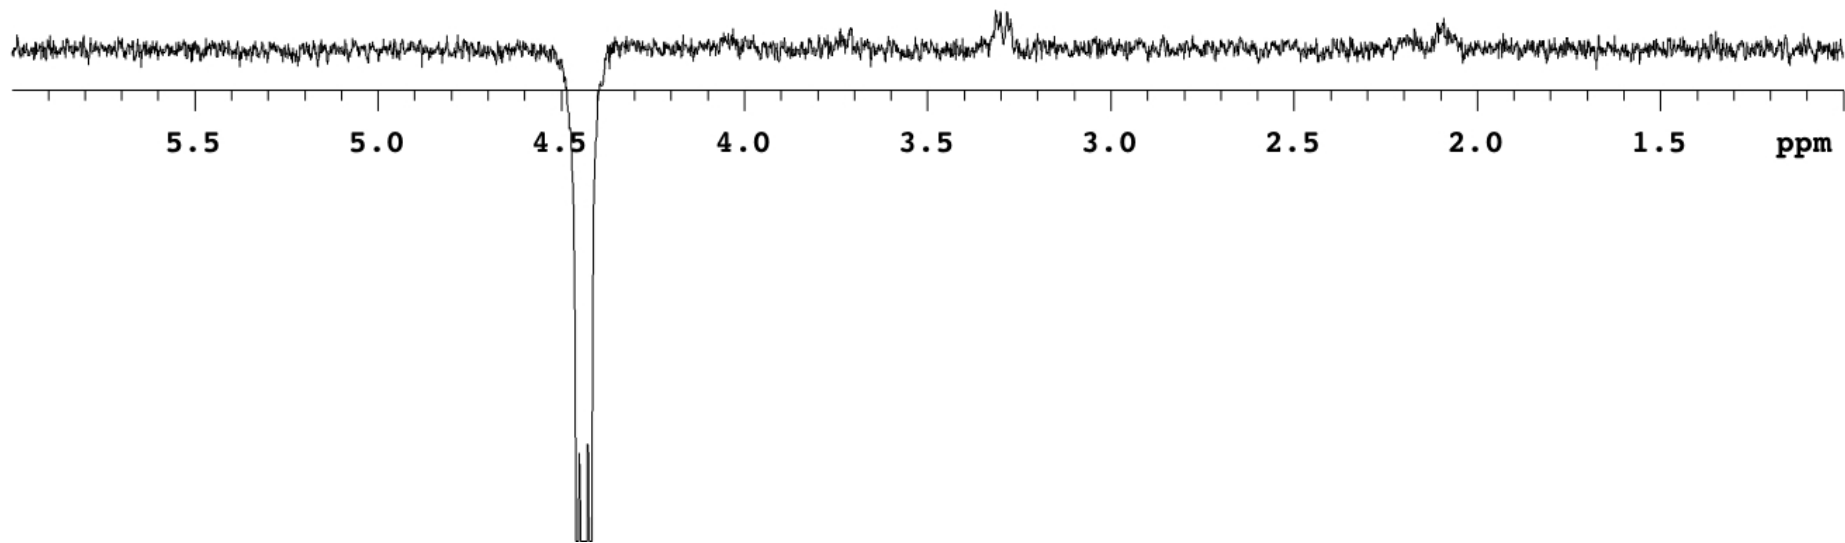

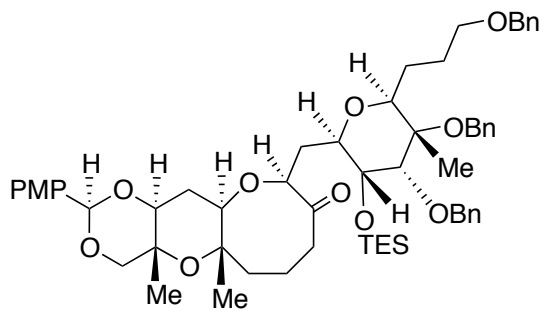

44

nOe1d, 500 MHz, C<sub>6</sub>D<sub>6</sub>

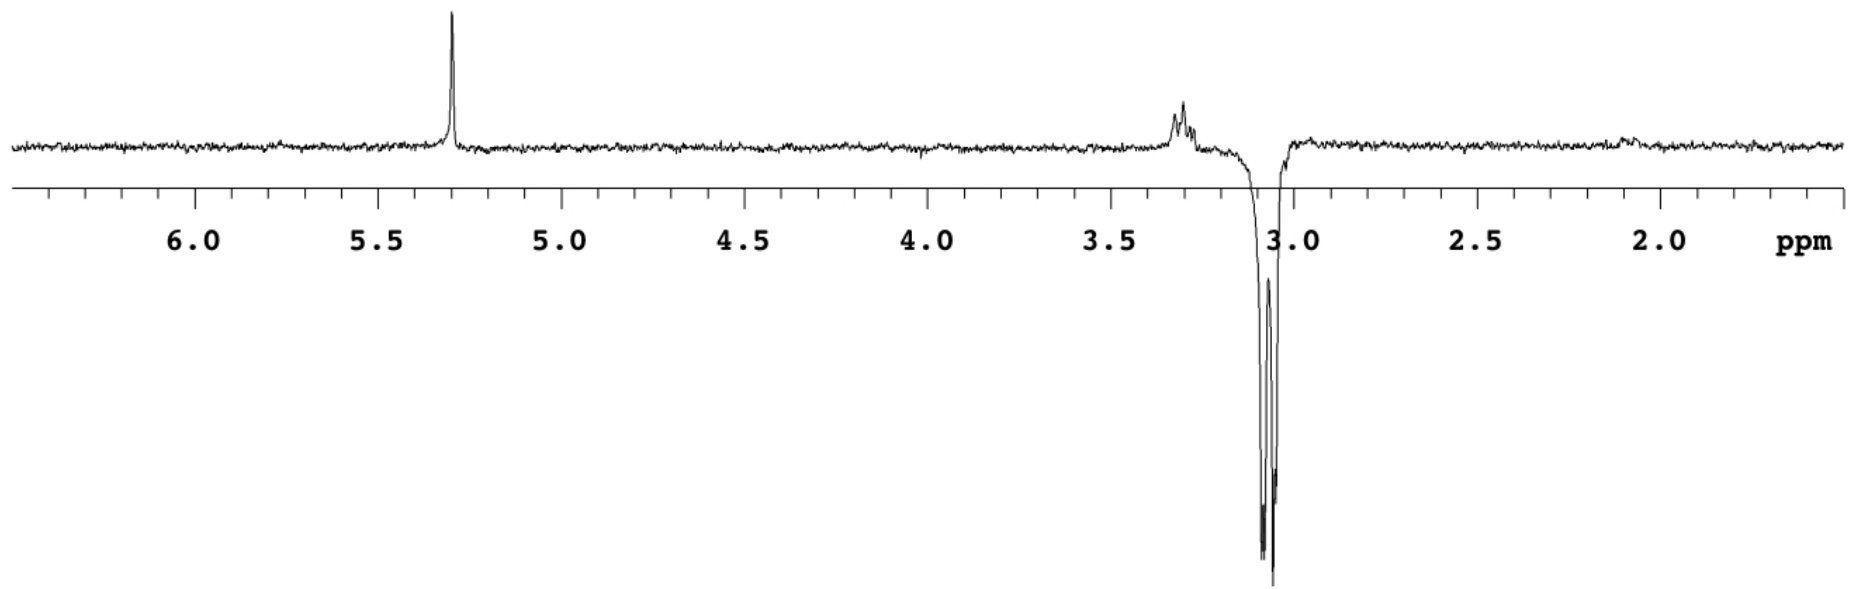

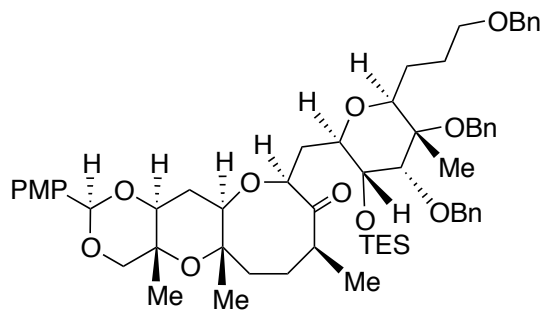

45

$^1\text{H NMR}$ , 400 MHz,  $\text{CD}_2\text{Cl}_2$

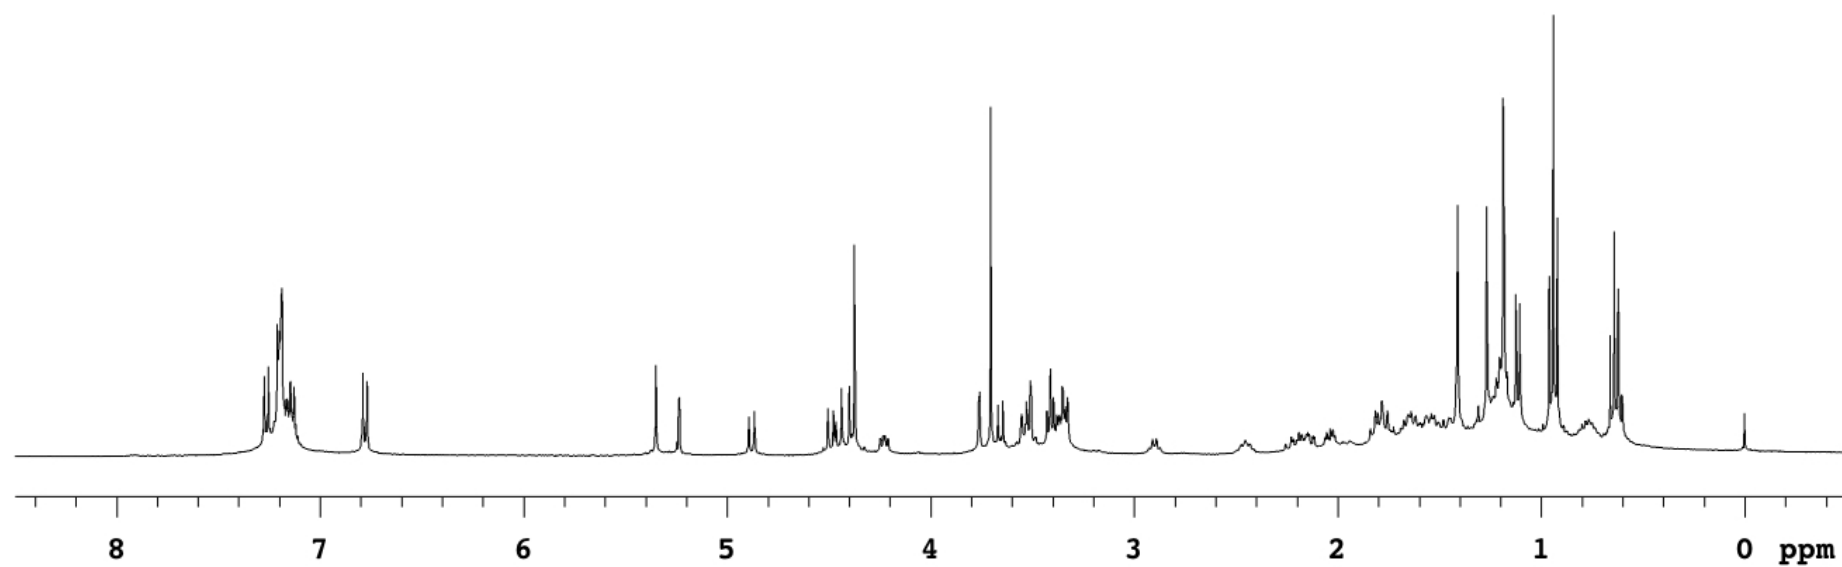

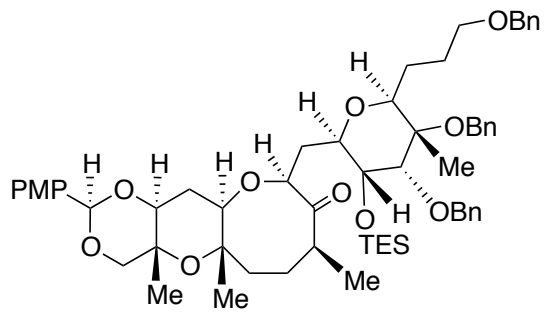

45

$^{13}\text{C}$  NMR, 100 MHz,  $\text{C}_6\text{D}_6$

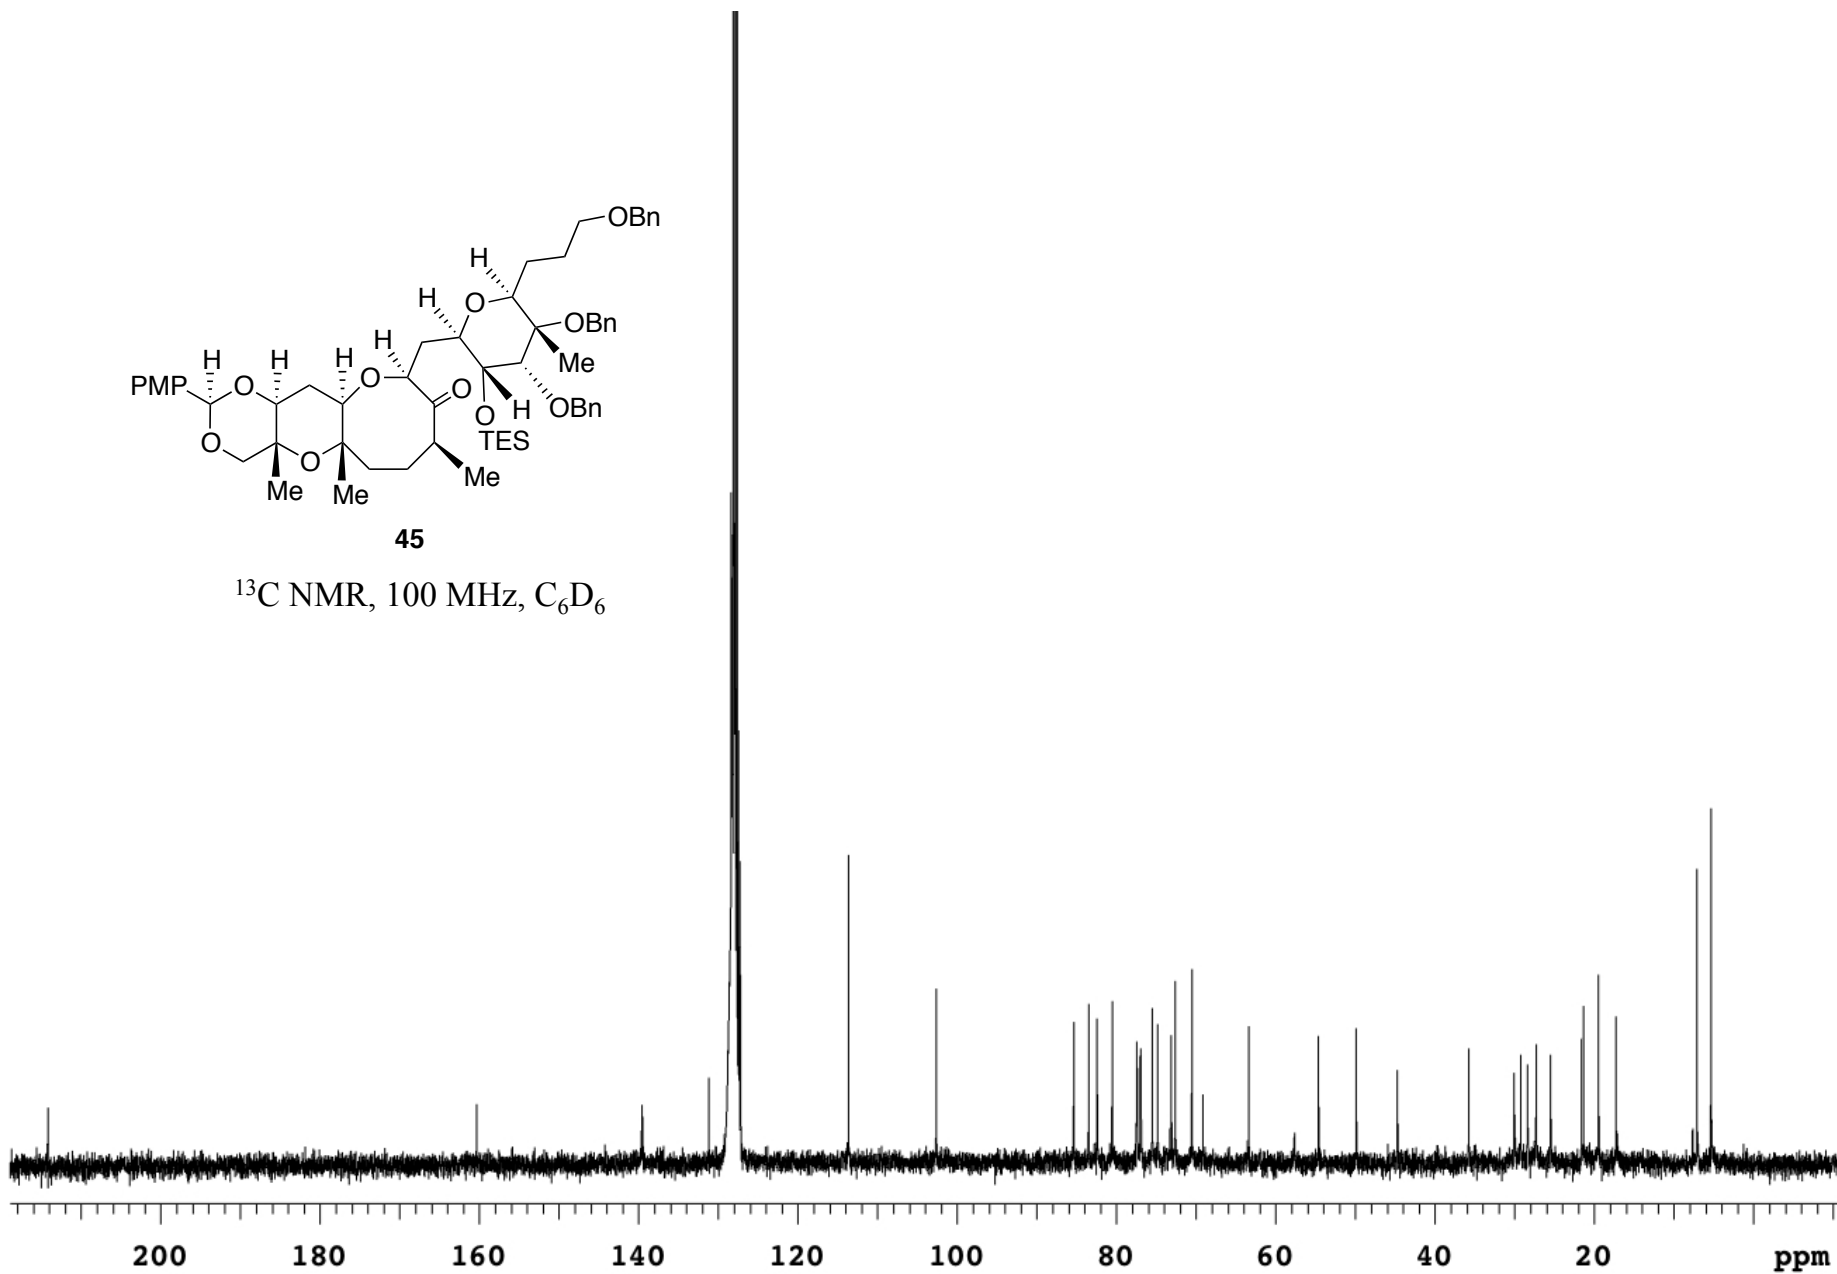

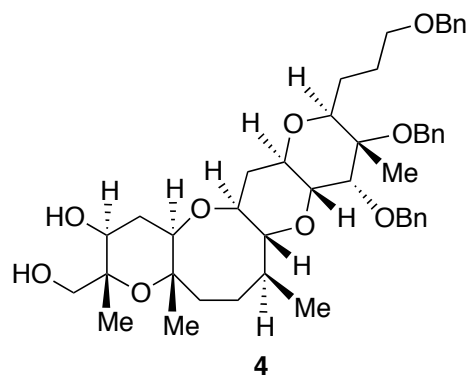

$^1\text{H NMR}$ , 500 MHz,  $\text{CD}_2\text{Cl}_2$

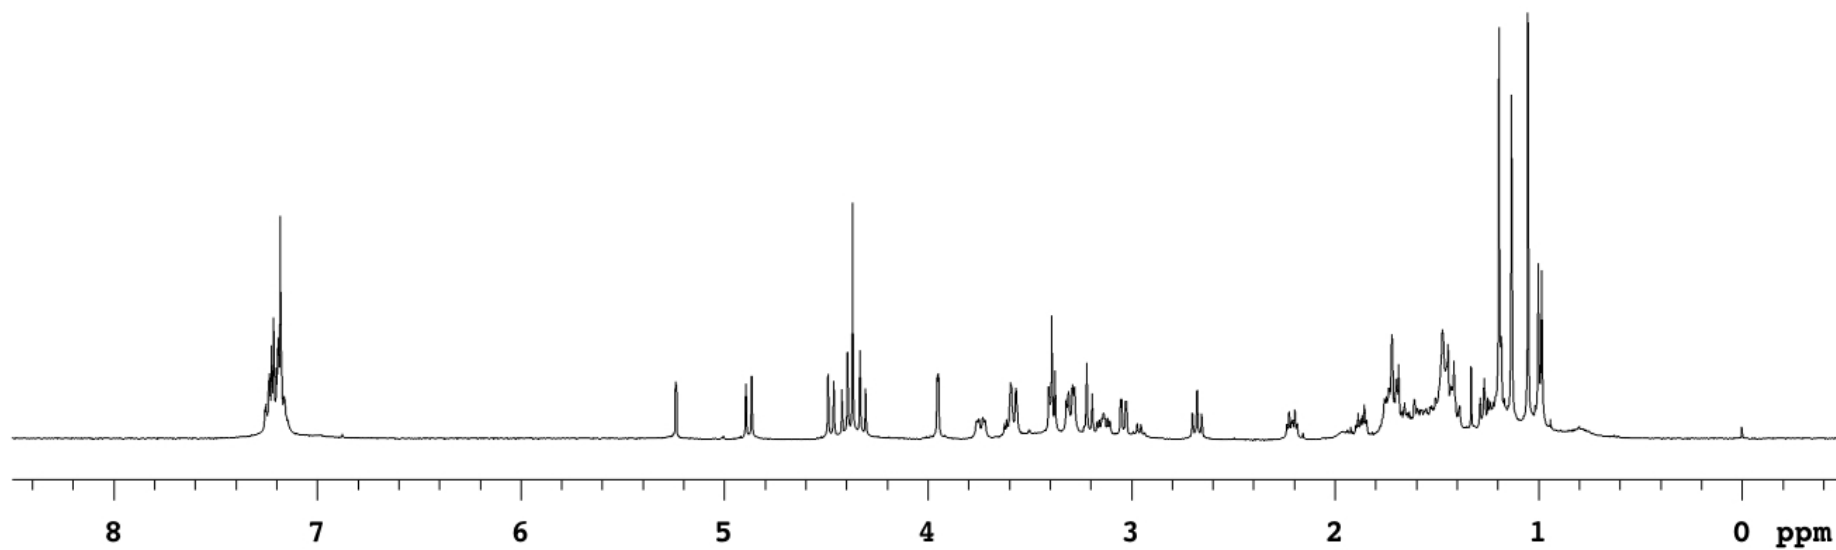



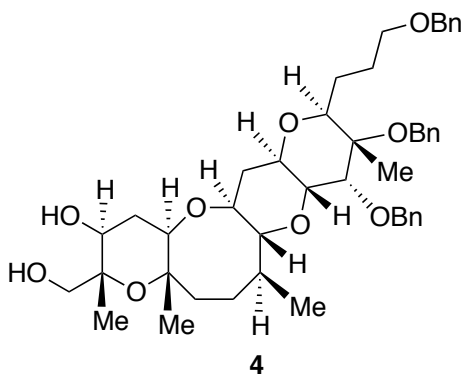

$^{13}\text{C}$  NMR, 100 MHz,  $\text{C}_6\text{D}_6$

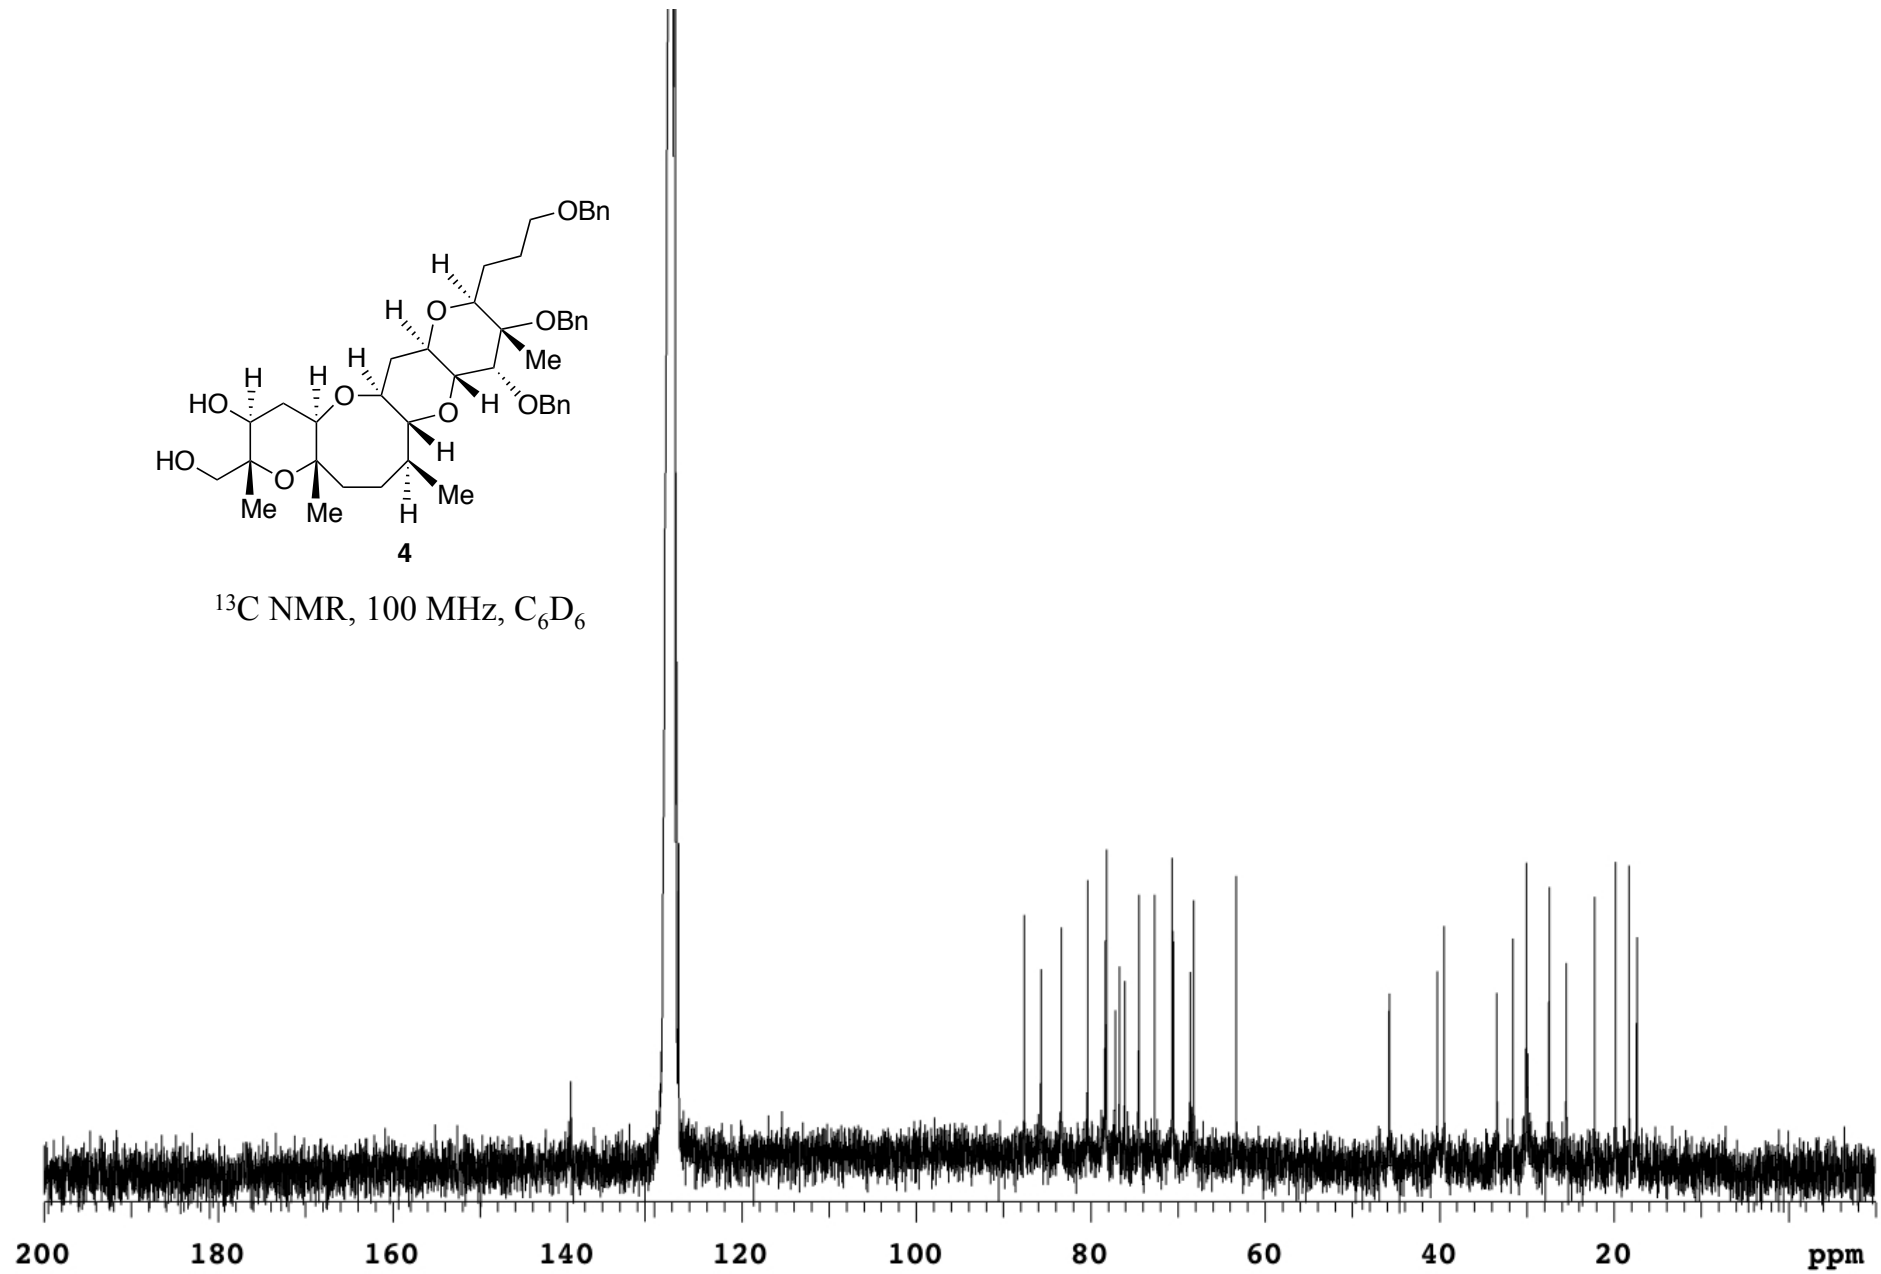

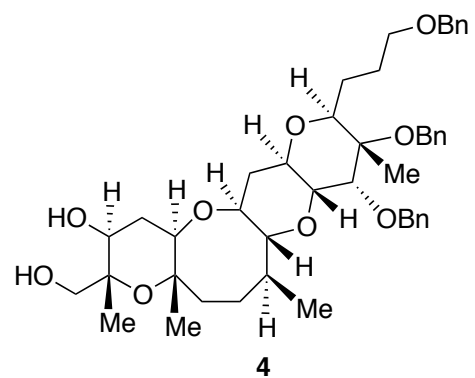

COSY, 500 MHz, CD<sub>2</sub>Cl<sub>2</sub>

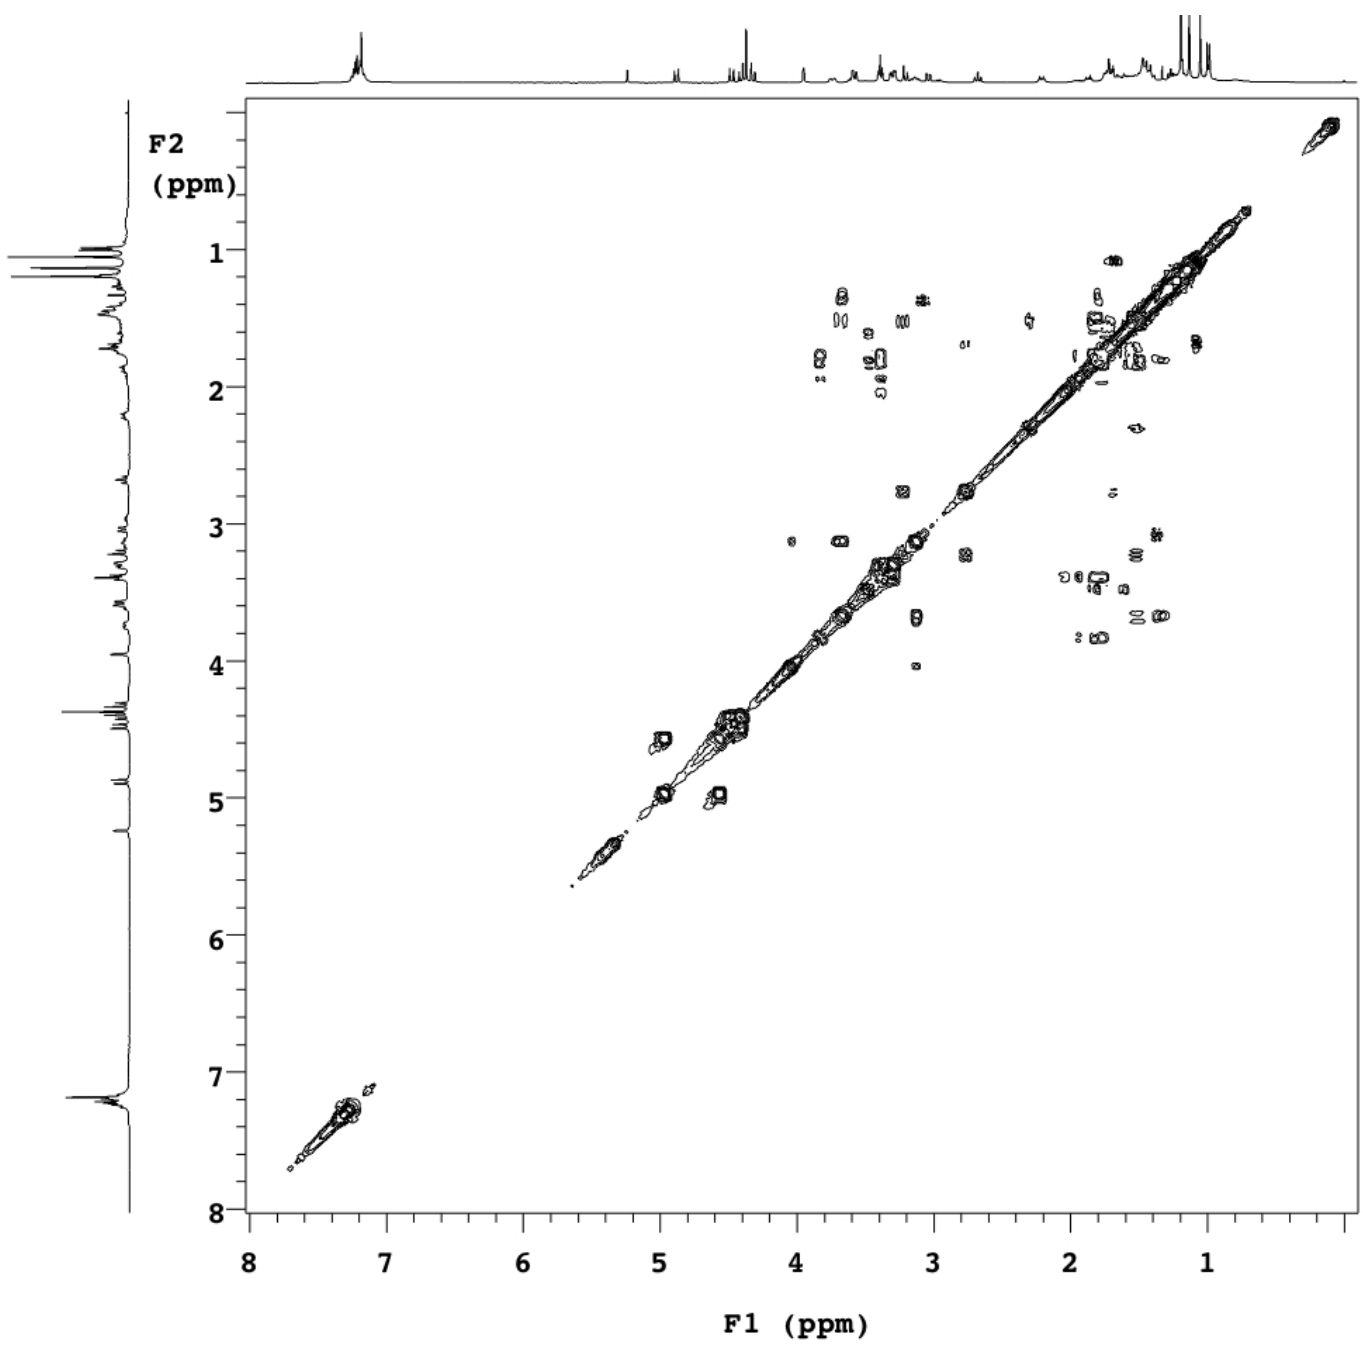



nOe1d, 500 MHz, CD<sub>2</sub>Cl<sub>2</sub>

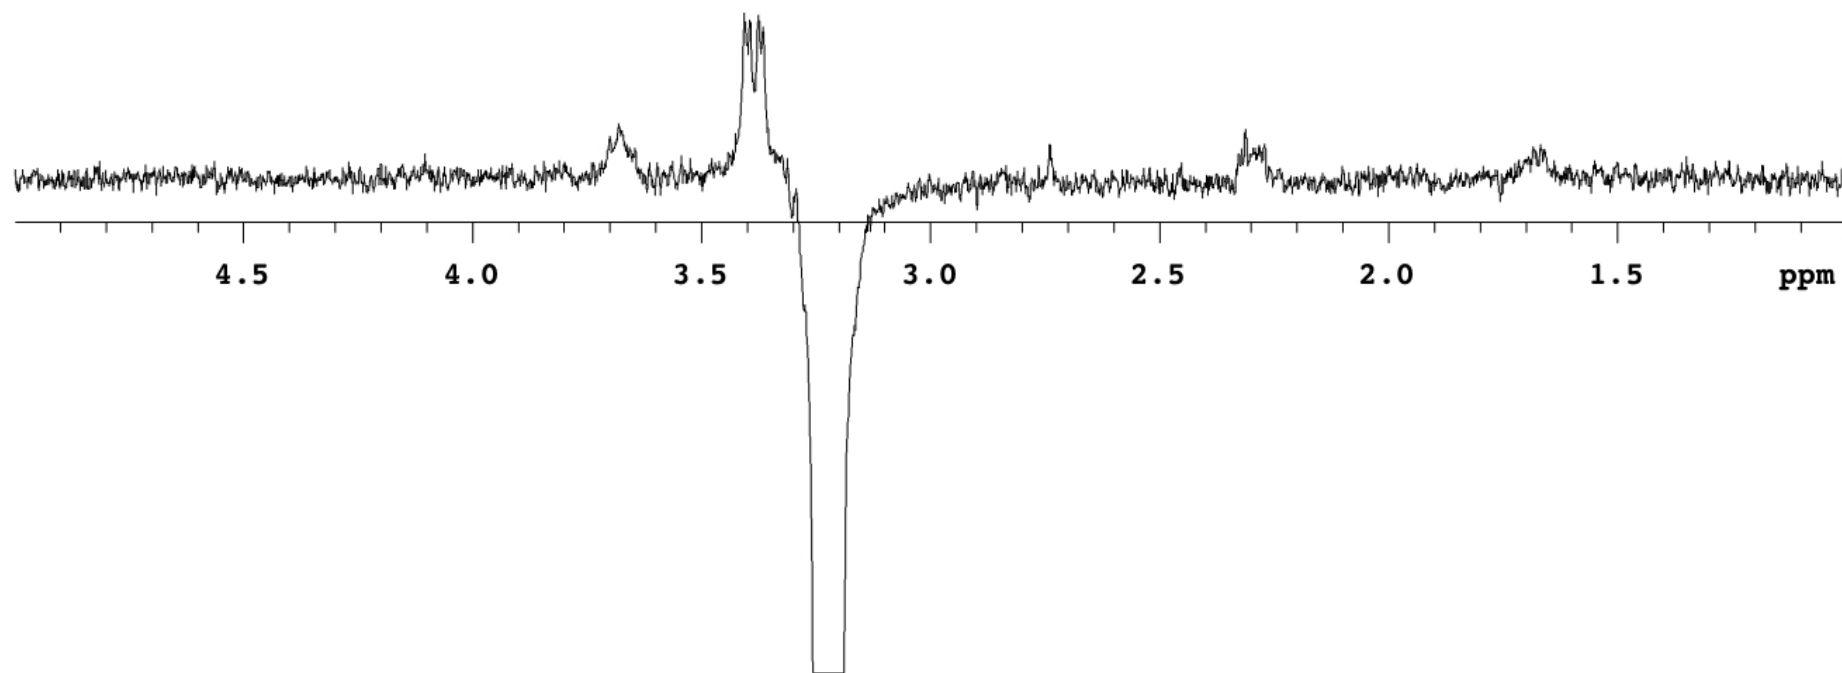

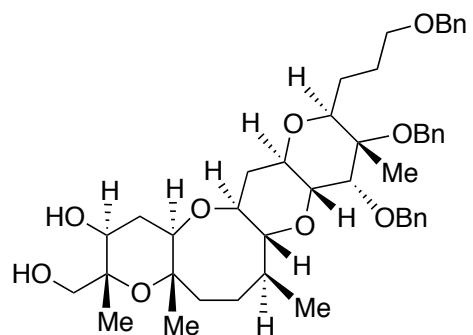

4

nOe1d, 500 MHz, CD<sub>2</sub>Cl<sub>2</sub>

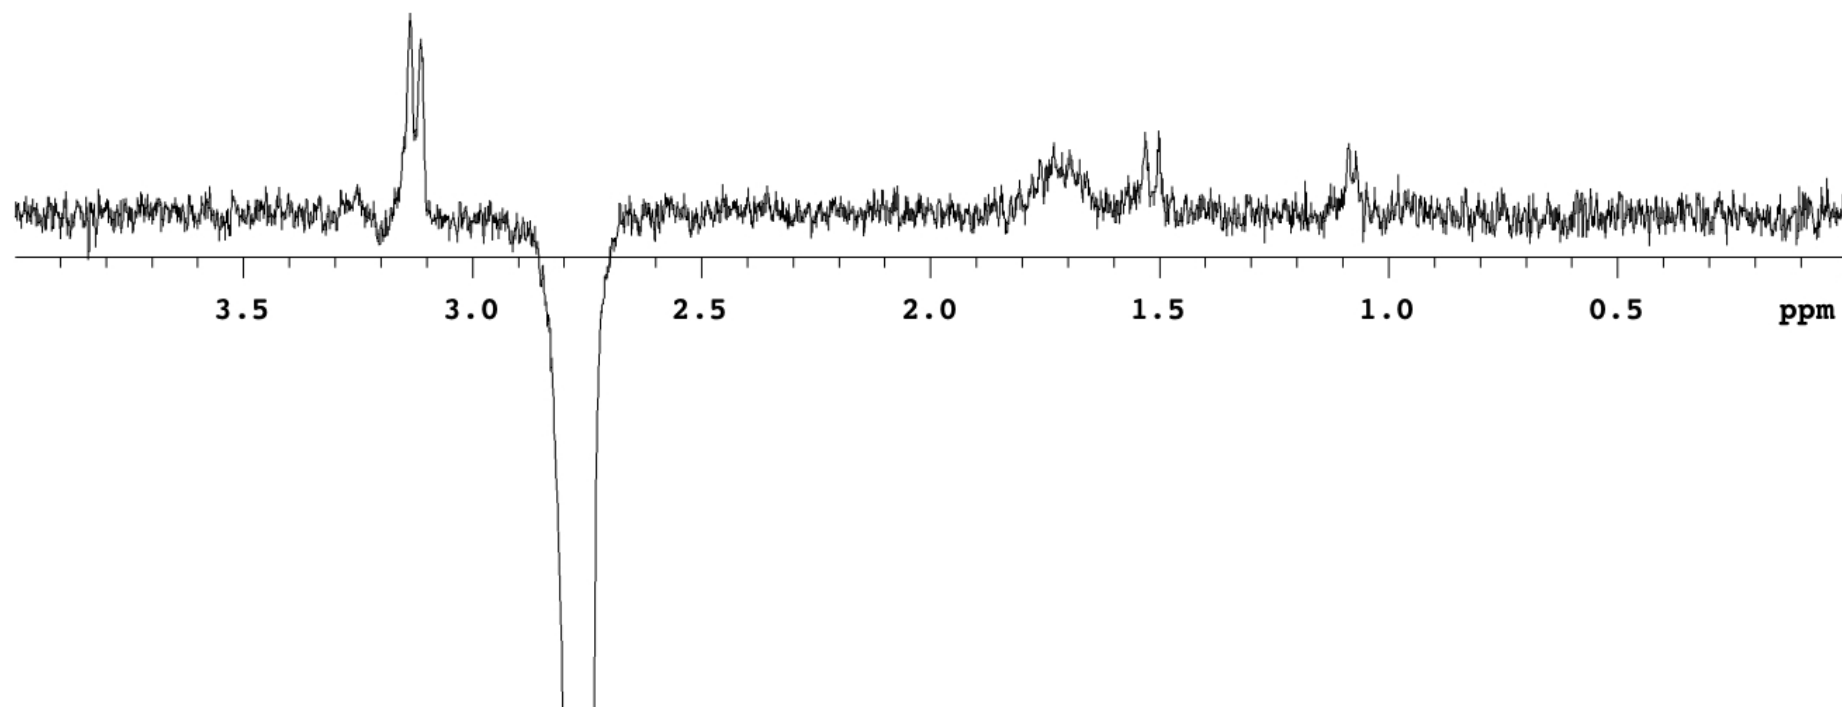

Supplement: NIHMS755564-supplement-2.pdf [file NIHMS755564-supplement-2.pdf]
